# Supplementary material
Source: Elsevier journal article supplement (https://comptes-rendus.academie-sciences.fr/chimie/article/10.1016/j.crci.2010.05.023/file/attach/mmc1.pdf)
Supplement: mmc1 [file mmc1.pdf]

## Anwendungen der Quantenchemie:

1. Dichtefunktionaltheoretische Untersuchungen an  
Phosphorheterocyclen und Übergangsmetallkomplexen

2. Neue 3D-QSPR Methoden

Den Naturwissenschaftlichen Fakultäten  
der Friedrich-Alexander-Universität Erlangen-Nürnberg

zur

Erlangung des Doktorgrades

vorgelegt von

Matthias Hennemann

aus

Bamberg

2003

# Inhaltsverzeichnis

|                                                                                              |            |
|----------------------------------------------------------------------------------------------|------------|
| <b>1. Einleitung</b> .....                                                                   | <b>1</b>   |
| 1.1 Theoretischer Hintergrund .....                                                          | 2          |
| 1.1.1 Die Schrödingergleichung .....                                                         | 2          |
| 1.1.2 Die Born-Oppenheimer-Näherung .....                                                    | 2          |
| 1.1.3 Die ab initio Hartree-Fock-Theorie .....                                               | 4          |
| 1.1.4 Møller-Plesset-Störungstheorie .....                                                   | 6          |
| 1.1.5 Dichtefunktionaltheorie .....                                                          | 7          |
| 1.1.6 Semiempirische MO-Theorie .....                                                        | 11         |
| 2. $\sigma^*$ -Aromatizität siebengliedriger Phosphorheterocyclen .....                      | 14         |
| 2.1 Einleitung .....                                                                         | 14         |
| 2.1.1 Aromatizitätskriterien .....                                                           | 15         |
| 2.1.2 Formen der Aromatizität .....                                                          | 19         |
| 2.2 Rechenmethoden .....                                                                     | 25         |
| 2.3 Ergebnisse .....                                                                         | 25         |
| 2.3.1 1,1-Disubstituierte 1H-Phosphepiniumkationen .....                                     | 26         |
| 2.3.2 1-Monosubstituierte 1H-Phosphepiniumkationen .....                                     | 35         |
| 2.3.3 1-Monosubstituierte 1H-Azepiniumkationen .....                                         | 46         |
| 2.3.4 1-Monosubstituierte Silepinderivate .....                                              | 57         |
| 2.3.5 7-Monosubstituierte 1,3,5-Cycloheptatriene .....                                       | 65         |
| 2.4 Zusammenfassung .....                                                                    | 73         |
| <b>3. Eigenschaften und Reaktivität übergangsmetallgebundener Phosphorheterocyclen</b> ..... | <b>74</b>  |
| <b>3.1 Einleitung</b> .....                                                                  | <b>74</b>  |
| <b>3.2 Cyclodimerisierung von Phosphaalkin an Kobaltkomplexen</b> .....                      | <b>75</b>  |
| <b>3.2.1 Einleitung</b> .....                                                                | <b>75</b>  |
| <b>3.2.2 Rechenmethoden</b> .....                                                            | <b>77</b>  |
| <b>3.2.3 Ergebnisse</b> .....                                                                | <b>77</b>  |
| <b>3.2.4 Zusammenfassung</b> .....                                                           | <b>93</b>  |
| <b>3.3 Tris(2,4-di-tert-butyl-1,3-diphosphet)molybdän</b> .....                              | <b>94</b>  |
| <b>3.3.1 Einleitung</b> .....                                                                | <b>94</b>  |
| <b>3.3.2 Rechenmethoden</b> .....                                                            | <b>95</b>  |
| <b>3.3.3 Ergebnisse</b> .....                                                                | <b>95</b>  |
| <b>3.3.4 Zusammenfassung</b> .....                                                           | <b>102</b> |
| <b>3.4 Eisenkomplexe mit phosphororganischen <math>\pi</math>-Liganden</b> .....             | <b>103</b> |

|                                                             |     |
|-------------------------------------------------------------|-----|
| 3.4.1 Einleitung .....                                      | 103 |
| 3.4.2 Rechenmethoden .....                                  | 105 |
| 3.4.3 Ergebnisse .....                                      | 106 |
| 3.4.4 Zusammenfassung .....                                 | 131 |
| 3.5 Hexaphosphamanganocen .....                             | 133 |
| 3.5.1 Einleitung .....                                      | 133 |
| 3.5.2 Rechenmethoden .....                                  | 133 |
| 3.5.3 Berechnung der Hyperfeinkopplungskonstanten .....     | 134 |
| 3.5.4 Ergebnisse .....                                      | 135 |
| 3.5.5 Zusammenfassung .....                                 | 138 |
| 4. Cyclam-Komplexe .....                                    | 140 |
| 4.1 Einleitung .....                                        | 140 |
| 4.2 Rechenmethoden .....                                    | 142 |
| 4.3 Ergebnisse .....                                        | 143 |
| 4.3.1 Geometrien der wasserfreien Komplexe .....            | 143 |
| 4.3.2 Molekulares elektrostatisches Potential .....         | 150 |
| 4.3.3 Geometrien der partiell hydratisierten Komplexe ..... | 153 |
| 4.3.4 Ionisationspotentiale .....                           | 154 |
| 4.3.5 Reorganisationsenergien .....                         | 157 |
| 4.3.6 Sterische Effekte der Methylgruppen .....             | 158 |
| 4.4 Zusammenfassung .....                                   | 162 |
| 5. QSPR-Modelle zur $pK_{HB}$ -Vorhersage .....             | 163 |
| 5.1 Einleitung .....                                        | 163 |
| 5.2 Rechenmethoden .....                                    | 165 |
| 5.3 Der Datensatz .....                                     | 165 |
| 5.4 Testsätze .....                                         | 170 |
| 5.5 Deskriptoren .....                                      | 170 |
| 5.6 Ergebnisse .....                                        | 173 |
| 5.7 Zusammenfassung .....                                   | 178 |
| 6. Zusammenfassung .....                                    | 179 |
| 7. Literaturverzeichnis .....                               | 186 |

## 1. Einleitung

Verschiedene Begriffe wie Theoretische Chemie, Quantenchemie,<sup>1</sup> Computerchemie<sup>2</sup> und *Molecular Modeling*<sup>3</sup> haben sich im Sprachgebrauch theoretisch orientierter Chemiker etabliert. Die Theoretische Chemie, die in der Regel mit der Quantenchemie gleichgesetzt wird, ist ein Feld der Chemie, bei der mathematische Methoden mit fundamentalen Konzepten der Physik kombiniert werden, um chemische Fragestellungen zu studieren. Die Entwicklung neuer Algorithmen und Computerprogramme zum Lösen der Schrödingergleichung, basierend auf *first principles* oder *ab initio* Methoden, und deren Anwendung auf chemische Fragestellungen, fallen in diesen Bereich. Beim *Molecular Modeling* finden dagegen nicht nur rein quantenmechanische Modelle Anwendung, sondern auch, je nach Art und Größe des Problems, semiempirische oder auch empirische Verfahren, wie Kraftfeldmethoden. Daneben werden Moleküldynamikrechnungen, Monte Carlo Simulationen, Konformationsanalysen und computergestützte Verfahren zur Berechnung der freien Energie, Solvation und zur Simulation von Reaktionen angewendet. *Molecular Modeling* Techniken werden in der industriell chemischen, pharmazeutischen und agrochemischen Forschung breit angewendet. Speziell im Bereich des *drug designs* werden weitere *Molecular Modeling* Methoden für die Identifikation von Leitstrukturen angewendet, wie *Molecular Docking*, *de novo* Liganddesign, quantitative Struktur-Wirkungs-Beziehungen (*quantitative structure activity relationships* QSAR) und quantitative Struktur-Eigenschafts-Beziehungen (*quantitative structure property relationships* QSPR). Im Laufe der Zeit haben sich die Grenzen zwischen der Theoretischen Chemie auf der einen Seite und dem *Molecular Modeling* auf der anderen Seite immer mehr vermischt, was unter anderem auf den enormen Anstieg der Rechenleistung zurückzuführen ist, so dass immer häufiger auch rechenintensive *first principles* Methoden beim *Molecular Modeling* angewendet wurden. Die Computerchemie umfasst nun als Sammelbegriff alle angesprochenen computerbasierten Verfahren.<sup>2</sup>

Diese Arbeit befasst sich mit der Anwendung quantenchemischer Methoden auf verschiedene chemische Fragestellungen. Im ersten Teil werden dabei verschiedene Fragestellungen untersucht, die die Eigenschaften und Reaktionen von Phosphorheterocyclen und Übergangsmetallkomplexen betreffen. Der zweite Teil befasst sich mit der Anwendung quantenchemischer Methoden auf quantitative Struktur-Eigenschafts-Beziehungen.

## 2. Eigenschaften und Reaktivität übergangsmetallgebundener Phosphorheterocyclen

### 2.1 Einleitung<sup>92</sup>

Mehr als ein Jahrhundert drehte sich in der phosphororganischen Chemie alles um trivalente, dreifachkoordinierte  $\lambda^3\sigma^3$ - und pentavalente, vierfach koordinierte  $\lambda^5\sigma^4$ -Konfigurationen. Mit Beginn der sechziger Jahre wurde, maßgeblich beeinflusst durch die Entwicklung der  $^{31}\text{P}$ -NMR-Spektroskopie, die phosphororganische Chemie von Grund auf neu erforscht. Seitdem wurde ein großes Sortiment an  $\sigma^1$ -,  $\sigma^2$ -,  $\sigma^5$ - und  $\sigma^6$ -Verbindungen synthetisiert und charakterisiert. Mit der Entwicklung der Chemie dieser niedrig und hoch koordinierten Verbindungen erschloss sich nach und nach das große Facettenreichtum des Elements Phosphor. Dabei gleicht der Phosphor im hoch koordinierten Zustand dem Silizium, im mittel koordinierten Zustand dem Stickstoff und im niedrig koordinierten Zustand dem Kohlenstoff. Diese Phosphor-Kohlenstoff-Analogie der niedrig koordinierten phosphororganischen Verbindungen beruht auf dem Befund, dass Phosphor und Kohlenstoff ähnliche Elektronenakzeptor- und Elektronendonoreigenschaften aufweisen. So konnten Michl *et al.* zeigen, dass Phosphor zwar eine etwas geringere  $\sigma$ -Elektronegativität besitzt als Kohlenstoff, seine effektive  $\pi$ -Elektronegativität jedoch ähnlich groß oder sogar größer ist.<sup>93</sup> Im Einklang mit diesen Ergebnissen ist die Beobachtung, dass die  $\pi$ -Komponente der Doppelbindung in Phosphaethylen nahezu apolar, die  $\sigma$ -Komponente dagegen hoch polar ( $\text{P}^{\delta+}\text{-C}^{\delta-}$ ) ist.<sup>94</sup> Dies führt zu interessanten Analogien der Reaktivität von niedrig koordinierten Phosphor- und Kohlenstoffderivaten. Allerdings sind Phosphorverbindungen keine bloßen Kopien analoger Kohlenstoffspezies, was in aller erster Linie mit dem freien Elektronenpaar am Phosphor zusammenhängt.

Im Folgenden werden die Cyclodimerisierung von Phosphaalkin in der Koordinationssphäre von Kobaltkomplexen, die intramolekulare Reaktivität von  $\pi$ -koordinierten P-Heterocyclen, wie die P-C-Bindungsbildung in Tris(1,3-diphosphet)molybdän und verschiedene Reaktionsmechanismen bei der Umsetzung reaktiver Eisenkomplexe mit Phosphaalkin, und schließlich die Auswirkungen der Substitution von C-R-Fragmenten durch isolobale Phosphoratome in Hexaphosphamanganocen untersucht.

## 2.2 Cyclodimerisierung von Phosphaalkin an Kobaltkomplexen

### 2.2.1 Einleitung

Phosphaalkine bilden fünf verschiedene Typen von Komplexen (Abbildung 59),<sup>92</sup> wobei jedoch die *side-on* Koordination gegenüber der Koordination am freien Elektronenpaar des Phosphoratoms bevorzugt ist.<sup>95</sup>

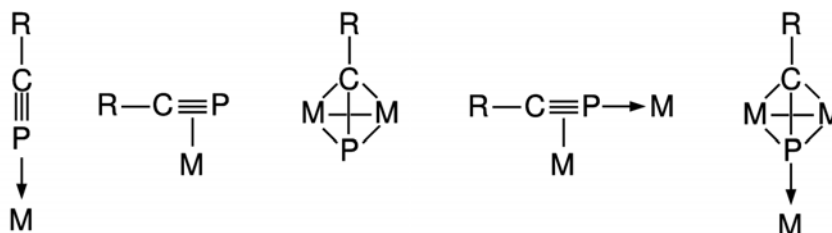

Abbildung 1. Verschiedene Typen von Phosphaalkin-Komplexen.

Aufgrund der Bevorzugung der  $\eta^2$ -Koordination ähnelt die Komplexchemie der Phosphaalkine in vielen Fällen der der Alkine.<sup>92</sup> Ein Beispiel hierfür ist die Cyclodimerisierung von Phosphaalkinen in der Koordinationssphäre von Übergangsmetallkomplexen (Abbildung 60). Diese führt im Allgemeinen zur Bildung der Kopf-Schwanz-1,3-Cycloaddukte,<sup>96</sup> in einigen Fällen wurde jedoch auch das Kopf-Kopf-1,2-Isomer isoliert.<sup>97</sup>

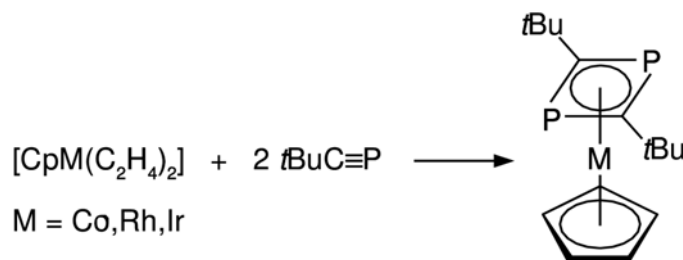

Abbildung 2. Cyclodimerisierung von Phosphaalkinen in der Koordinationssphäre von Übergangsmetallzentren.

DFT-Rechnungen deuten jedoch darauf hin, dass die 1,2-Isomere systematisch stabiler sind als die entsprechenden 1,3-Isomere.<sup>98</sup> Somit liegt die Vermutung nahe, dass es sich bei der experimentell beobachteten Bevorzugung der Kopf-Schwanz-1,3-Cycloaddukte um einen

kinetischen Effekt handelt. Diese Frage soll nun im Folgenden am Beispiel der Cyclodimerisierung von unsubstituiertem Phosphaalkin in der Koordinationssphäre von Cyclopentadienylkobalt untersucht werden. Dabei gibt es drei denkbare Reaktionswege (Abbildung 61). So kann, ausgehend von *side-on*  $\eta^2$ -koordinierten Phosphaalkinen (**13** bzw. **16**), im ersten Reaktionsschritt eine P-C-, eine C-C- oder eine P-P-Bindung gebildet werden. Die erste Reaktion führt dabei zum Kopf-Schwanz-1,3-Isomer **15**, wohingegen die anderen beiden Reaktionen zum Kopf-Kopf-1,2-Isomer **18** führen.

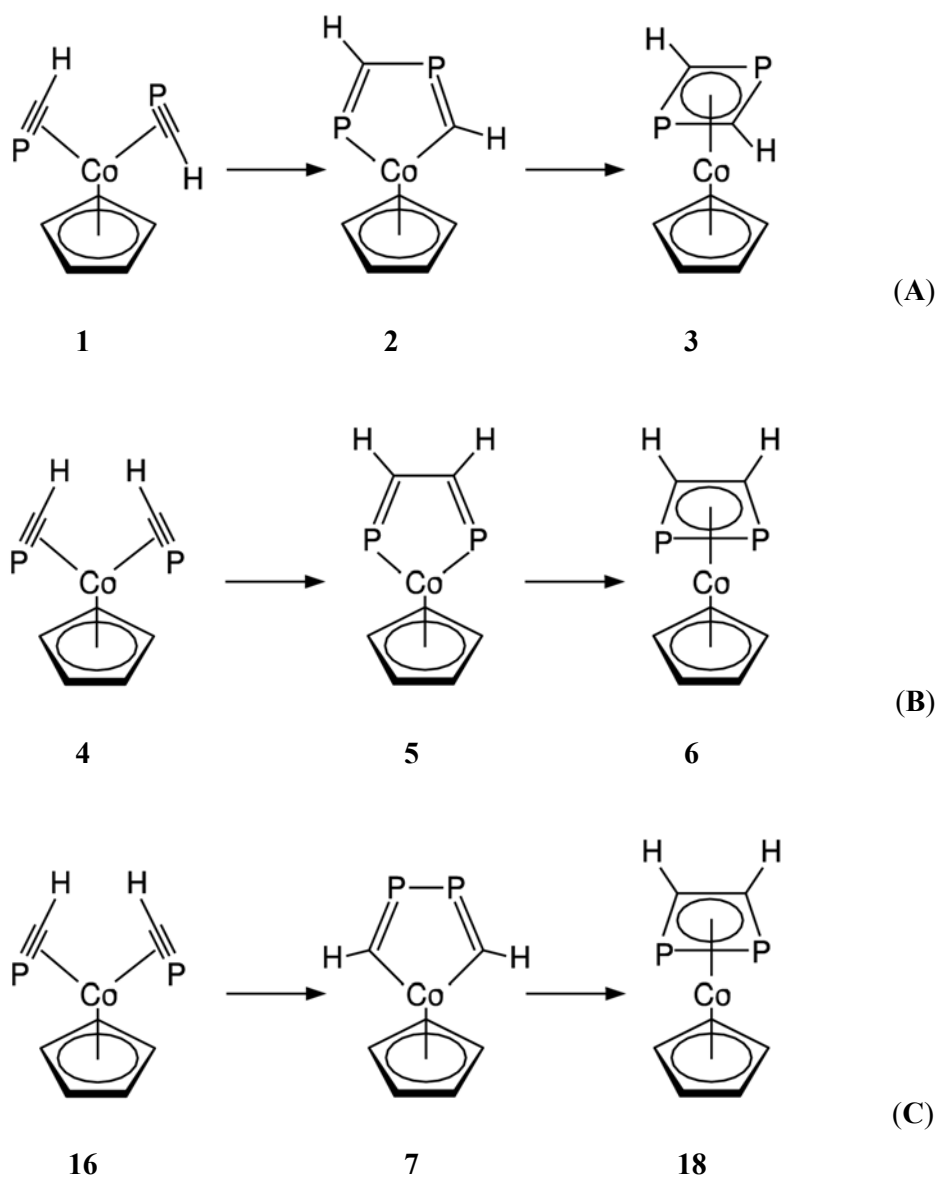

**Abbildung 3.** Mögliche Reaktionswege (A, B und C) für die Cyclodimerisierung von Phosphaalkin in der Koordinationssphäre von Cyclopentadienylkobalt.

### 2.2.2 Rechenmethoden

Alle Geometrien wurden mit dem in Gaussian98<sup>88</sup> implementierten B3LYP<sup>24,22</sup> drei Parameter Hybrid-Dichtefunktional optimiert und mit Frequenzrechnungen als lokale Minima oder Übergangsstrukturen charakterisiert. Da bei den Reaktionen möglicherweise Singulett-Triplett-Übergänge stattfinden, wurden sowohl die Singulett- als auch die Triplett-Zustände aller untersuchten Strukturen berechnet. Für die Triplett-Zustände wurde dabei der *unrestricted* Formalismus verwendet. Da B3LYP die Energieunterschiede zwischen den Singulett- und Triplett-Zuständen der Übergangsmetallkomplexe nur unzureichend wiedergibt, wurden die Strukturen außerdem mit dem B3LYP\*-Funktional von Reiher, Salomon und Hess<sup>25</sup> reoptimiert. Da sich die mit B3LYP\* berechneten Geometrien nur geringfügig von den mit B3LYP berechneten unterscheiden, wurde im Allgemeinen auf eine erneute Frequenzanalyse verzichtet. Als Basissatz wurde der Schäfer-Horn-Ahlrichs *split valence* Basissatz<sup>99</sup> (SHAsv) verwendet. Dieser wurde um jeweils einen Satz *d*-Funktionen mit Exponenten von 0.6 und 0.34 auf C und P und *p*- und *f*-Funktionen mit Exponenten von 0.105 und 1.17 auf Co erweitert (SHAsvp).<sup>100</sup>

### 2.2.3 Ergebnisse

Die mit B3LYP/SHAsvp berechneten Strukturen für den Reaktionsweg **A** sind in Abbildung 62 und 63 dargestellt. Die Strukturen für Reaktionsweg **B** sind in Abbildung 64 und 65 und für Reaktionsweg **C** in Abbildung 66 und 67 dargestellt.

Es fällt auf, dass, im Gegensatz zu der Arbeit von Creve, Nguyen und Vanquickenborne,<sup>98</sup> das Kobalt in den berechneten Zwischenstufen mit Ausnahme von **19t** nicht wie erwartet  $\eta^2$ -gebunden ist und einen planaren Kobalto-diphospha-cyclopentadienylring bildet, sondern eine gewisse Neigung besitzt, Bindungen zu weiteren Atomen im Ring zu knüpfen und somit  $\eta^3$ - oder  $\eta^4$ -gebunden ist. So ist das Kobalt in den Singulett-Zwischenstufen **14s** und **17s** der Reaktionswege **A** und **B** durch eine zusätzliche Co-P (2.612 Å, B3LYP/SHAsvp, Tabelle 25) bzw. Co-C-Wechselwirkung (2.288 Å)  $\eta^3$ -gebunden, während es in den Triplett-Zwischenstufen **14t** (Co-C1 = 2.072 Å; Co-P2 = 2.647 Å) und **17t** (Co-C1 = 2.080 Å; Co-C2 = 2.078 Å)  $\eta^4$ -gebunden ist. Daneben existieren jedoch auch die erwarteten  $\eta^2$ -gebundenen Kobalto-diphospha-cyclopentadienylkomplexe **22t** und **26t**.



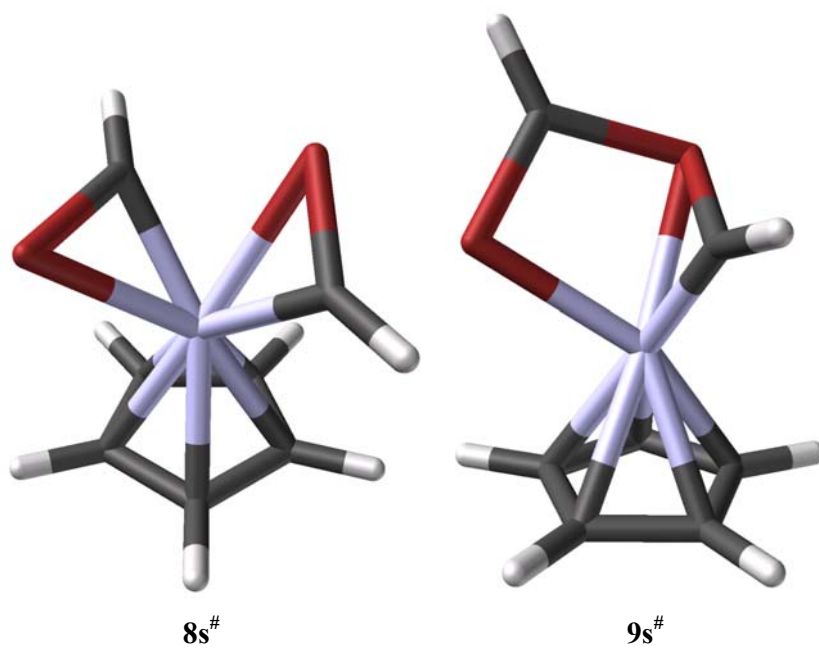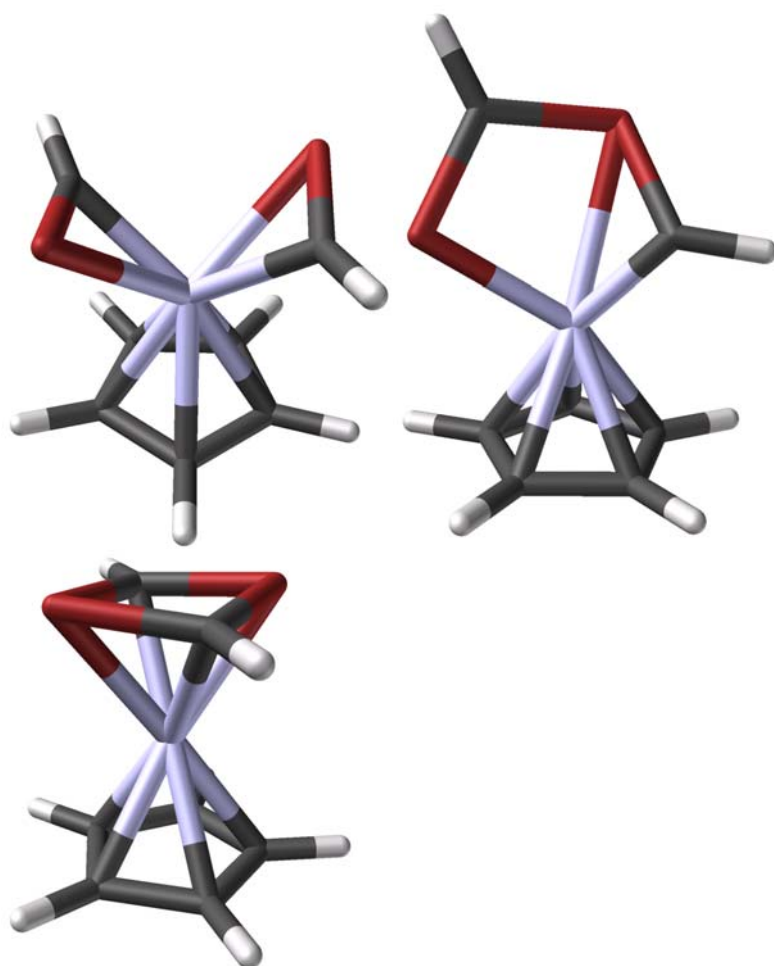

13s

14s

15s

**Abbildung 4.** Berechnete Singulett-Strukturen (Edukt 13s, Zwischenstufe 14s, Produkt 15s und die beiden Übergangsstrukturen 20s<sup>#</sup> und 21s<sup>#</sup>) für den Reaktionsweg A.

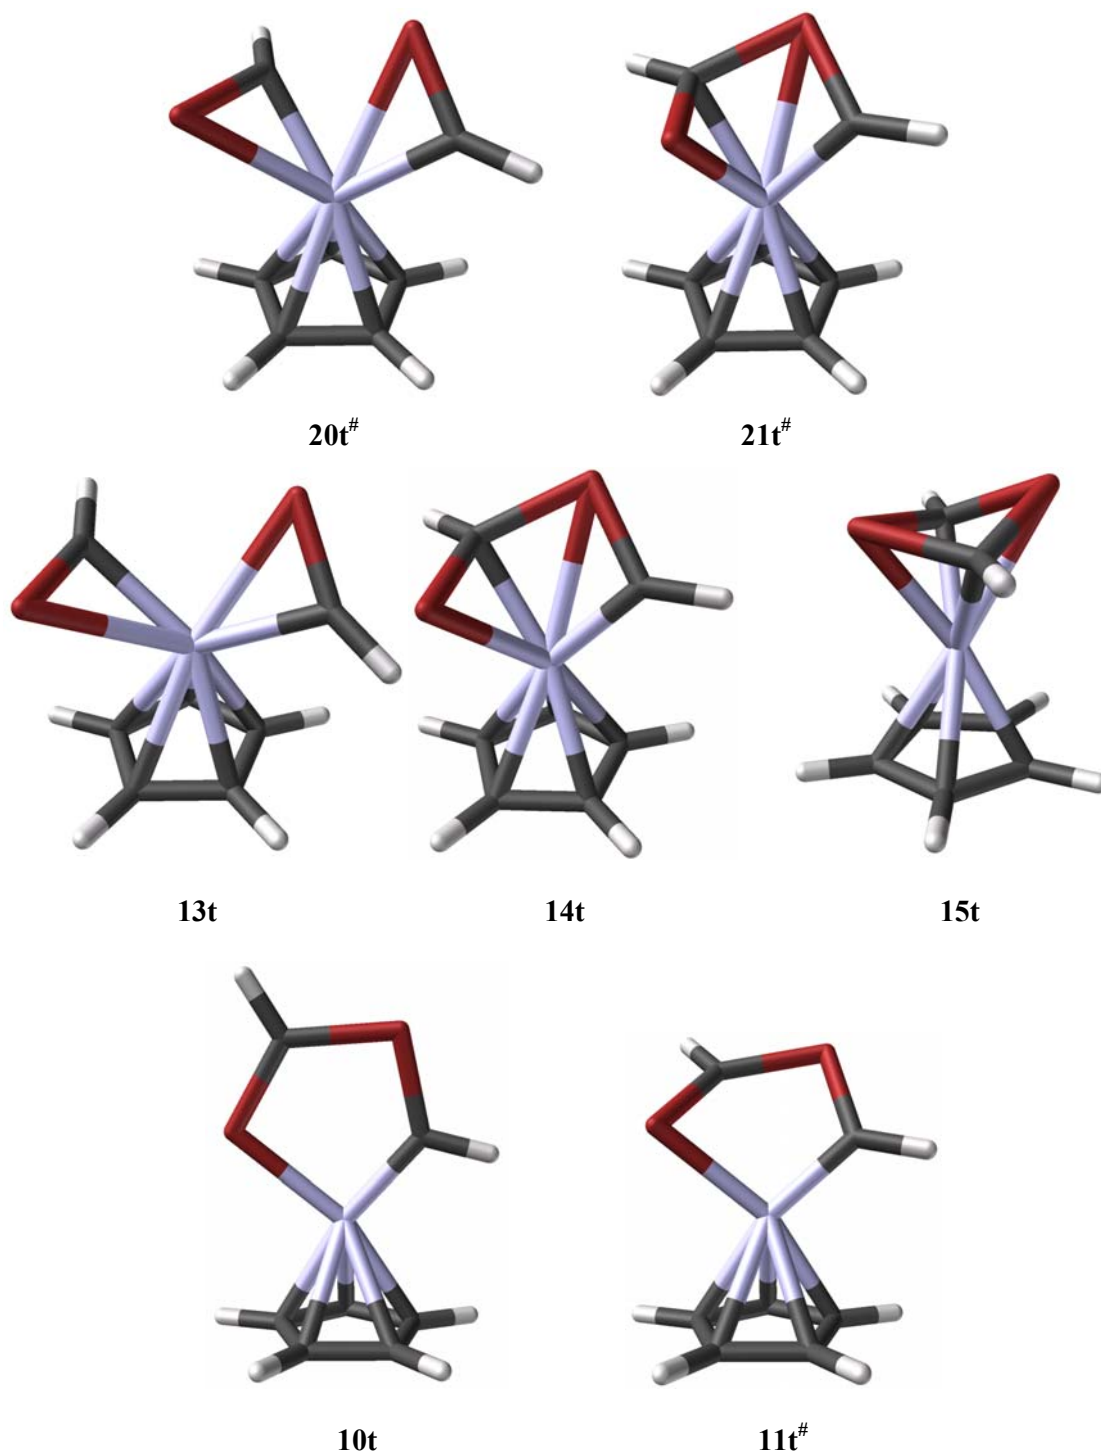

---

*Abbildung 5.* Berechnete Triplett-Strukturen (Edukt **13t**, Zwischenstufe **14t**, Produkt **15t** und die beiden Übergangsstrukturen **20t<sup>#</sup>** und **21t<sup>#</sup>**) für den Reaktionsweg *A*. Neben der  $\square^4$ -gebundenen Zwischenstufe **14t** existiert noch eine weitere  $\square^2$ -gebundene Struktur **22t**, die ursprünglich als mögliche Zwischenstufe in Betracht gezogen wurde und die durch die Übergangsstruktur **23t<sup>#</sup>** mit **14t** verknüpft ist.

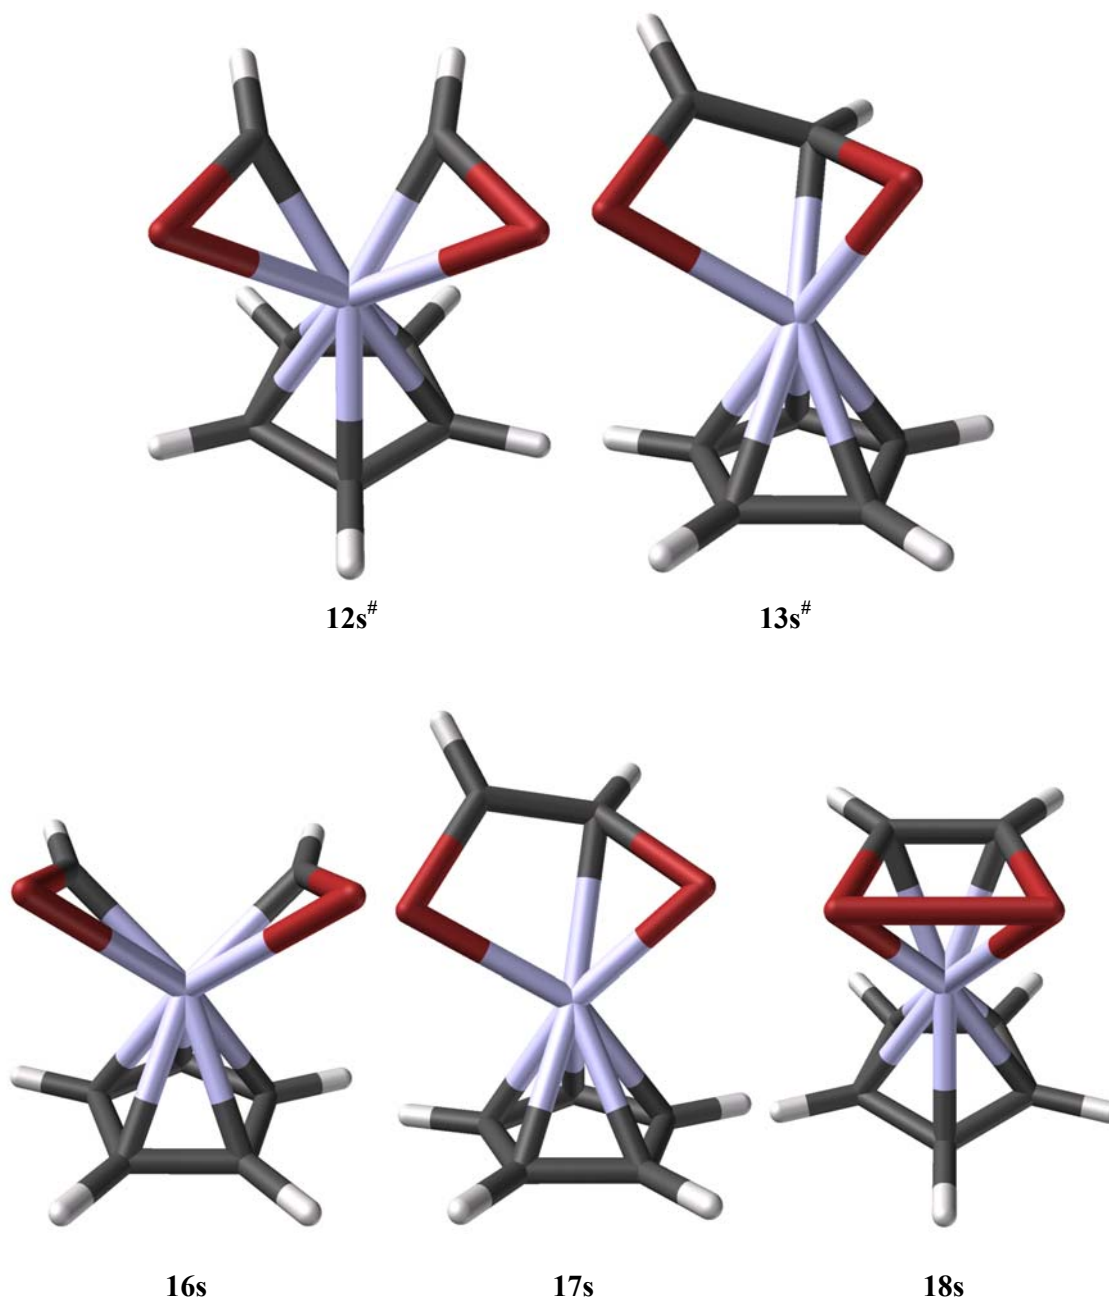

**Abbildung 6.** Berechnete Singulett-Strukturen (Edukt 16s, Zwischenstufe 17s, Produkt 18s und die beiden Übergangstrukturen 24s<sup>#</sup> und 25s<sup>#</sup>) für den Reaktionsweg B.

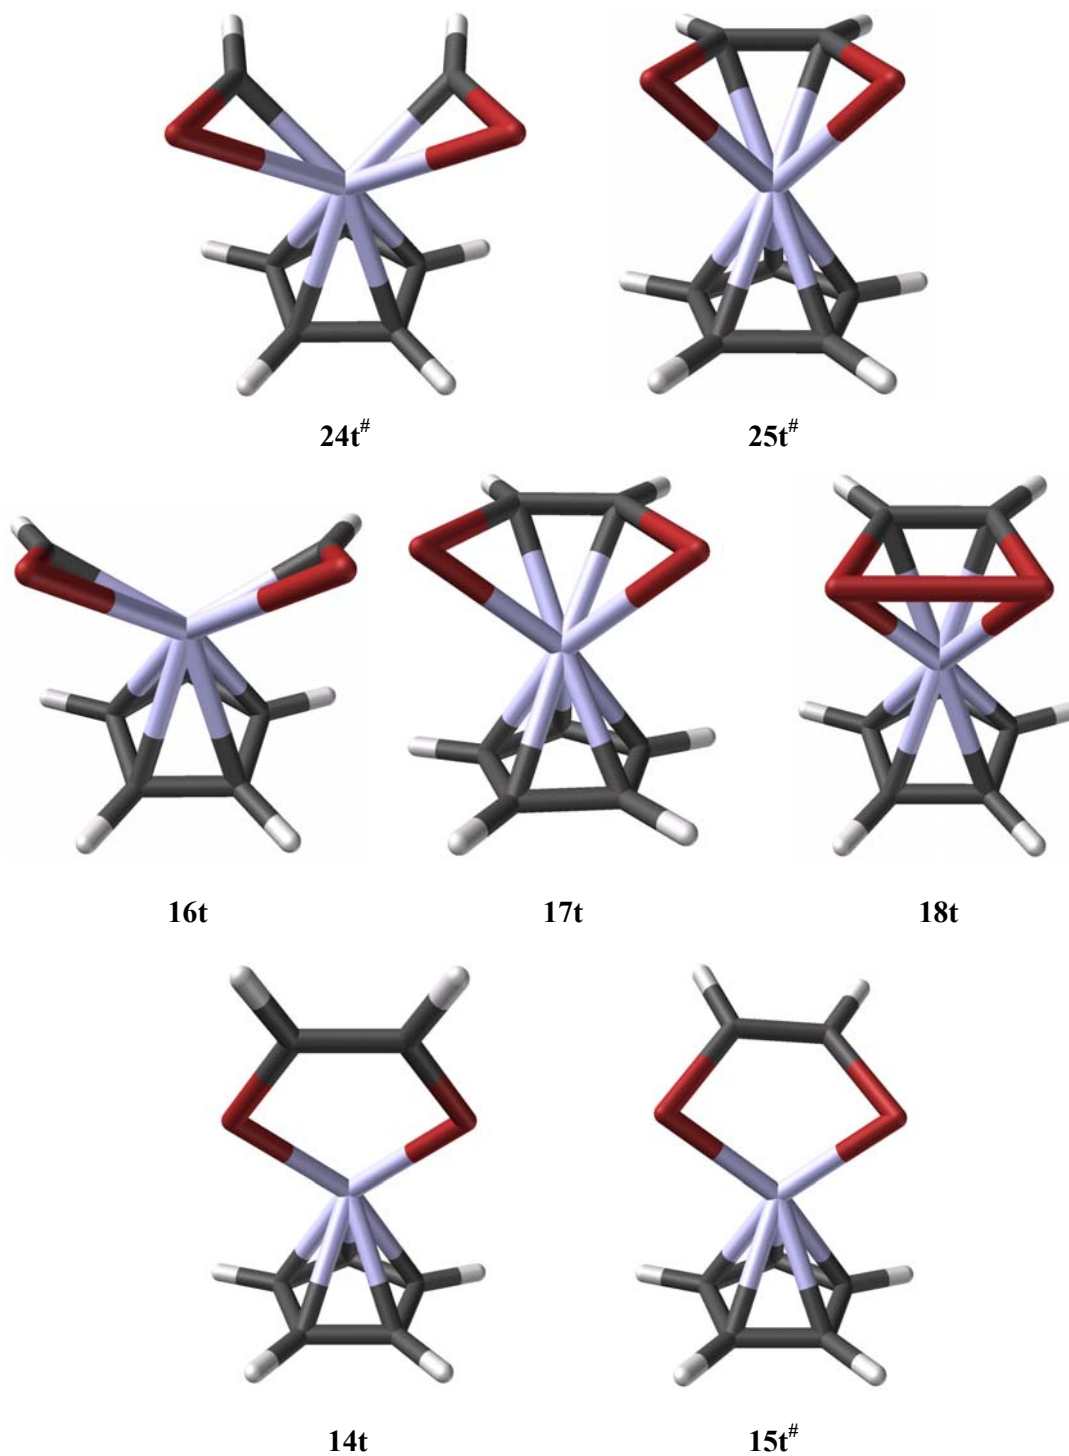

**Abbildung 7.** Berechnete Triplet-Strukturen (Edukt **16t**, Zwischenstufe **17t**, Produkt **18t** und die beiden Übergangsstrukturen **24t<sup>#</sup>** und **25t<sup>#</sup>**) für den Reaktionsweg **B**. Neben der  $\square^4$ -gebundenen Zwischenstufe **17t** existiert noch eine weitere  $\square^2$ -gebundene Struktur **26t**, die ursprünglich als mögliche Zwischenstufe in Betracht gezogen wurde und die durch die Übergangsstruktur **27t<sup>#</sup>** mit **17t** verknüpft ist.

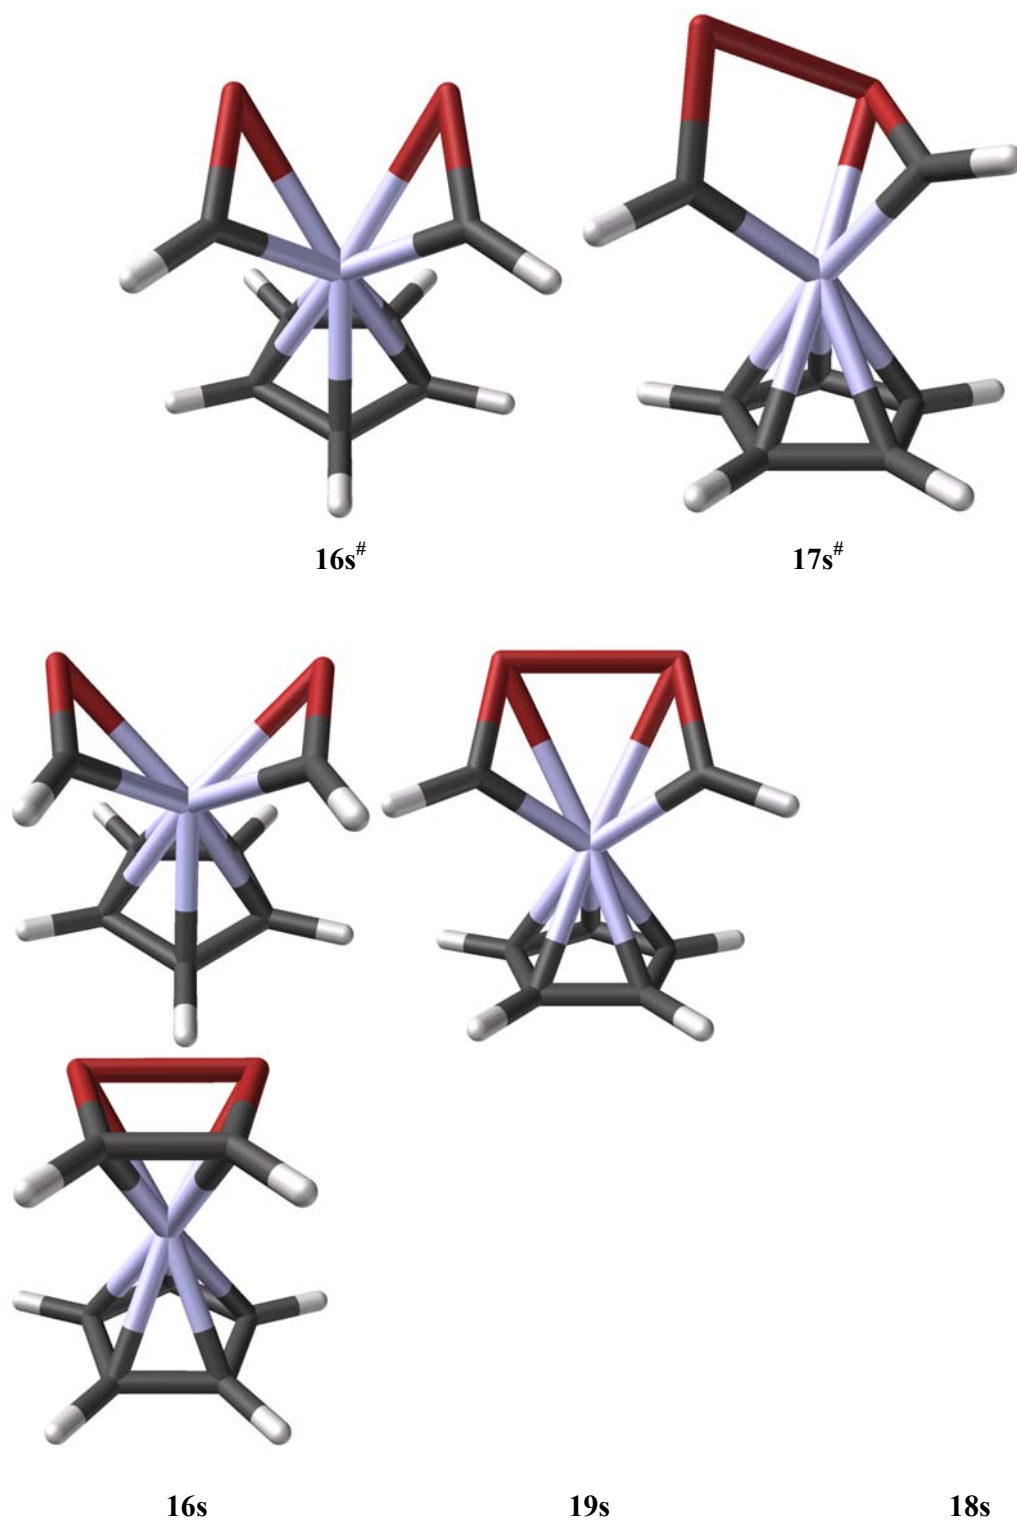

**Abbildung 8.** Berechnete Singulett-Strukturen (Edukt **16s**, Zwischenstufe **19s**, Produkt **18s** und die beiden Übergangsstrukturen **28s<sup>#</sup>** und **29s<sup>#</sup>**) für den Reaktionsweg **C**.



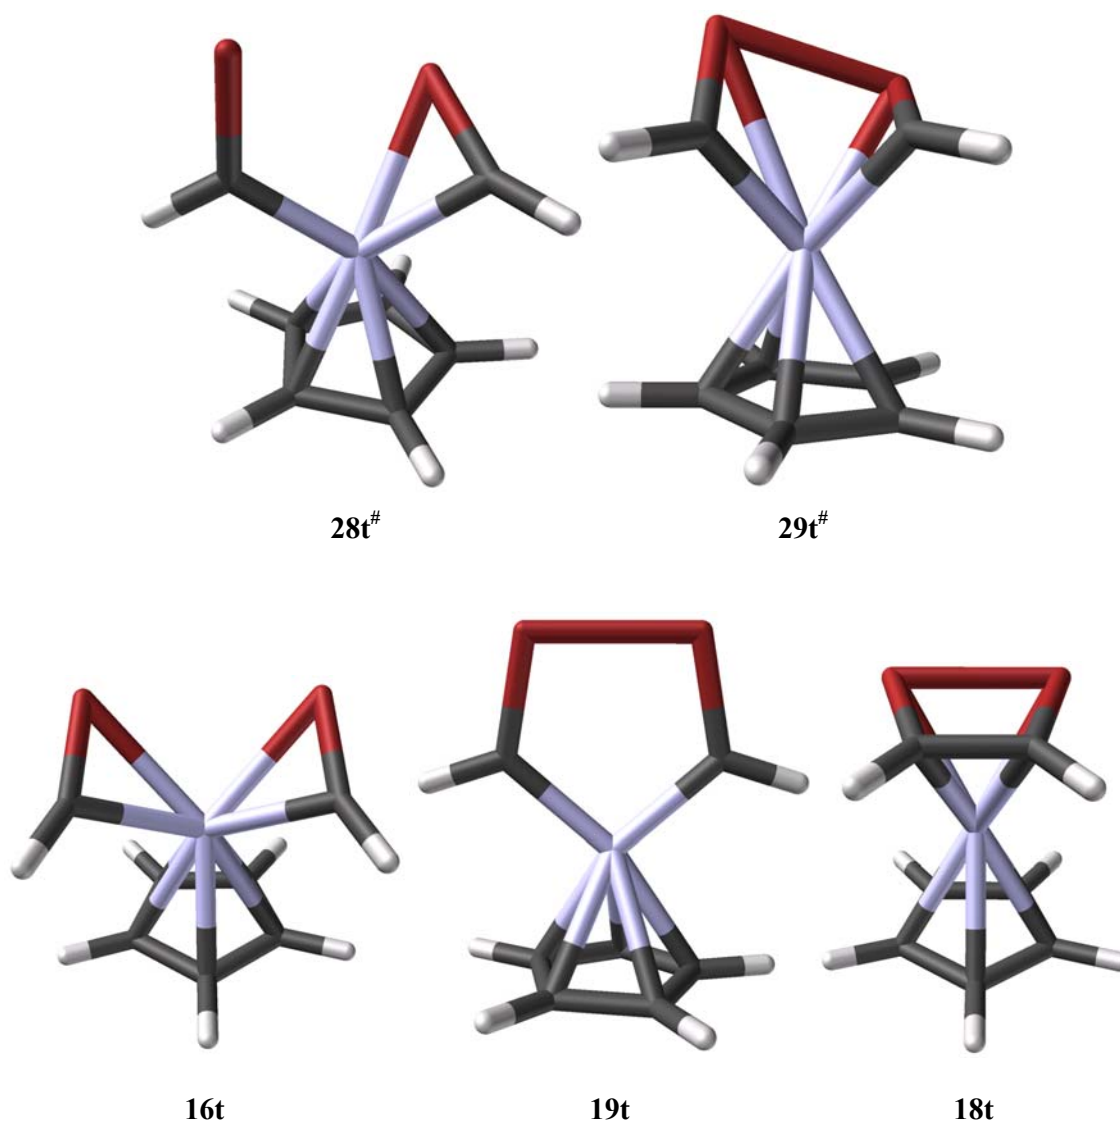

**Abbildung 9.** Berechnete Triplett-Strukturen (Edukt **16t**, Zwischenstufe **19t**, Produkt **18t** und die beiden Übergangstrukturen **28t<sup>#</sup>** und **29t<sup>#</sup>**) für den Reaktionsweg C. In diesem Fall konnte keine  $\square^4$ -gebundene Struktur für die Zwischenstufe gefunden werden, so dass in diesem Fall wahrscheinlich die  $\square^2$ -gebundene Struktur **19t** die Zwischenstufe darstellt.



Die berechneten absoluten und relativen Energien und Nullpunktsschwingungsenergien der untersuchten Strukturen sind in Tabelle 24 aufgelistet und in Abbildung 69 und 70 sind die mit B3LYP/SHAsvp bzw. die mit B3LYP\*/SHAsvp berechneten relativen Energien der untersuchten Strukturen der drei Reaktionen dargestellt. Die relativen Energien der Edukte und der Produkte, bezogen auf **13s**, stimmen dabei mit  $E_{\text{rel}}(\mathbf{16s}) = 0.0$ ,  $E_{\text{rel}}(\mathbf{15s}) = -47.4$  und  $E_{\text{rel}}(\mathbf{18s}) = -60.2 \text{ kcal}\cdot\text{mol}^{-1}$  sehr gut mit den Werten aus der Arbeit von Creve *et al.*<sup>98</sup> (-0.5, -47.8 bzw. -58.6 kcal·mol<sup>-1</sup>) überein.

Die Triplett-Zustände der Edukte und der ersten Übergangsstrukturen weisen durchweg eine deutlich höhere Energie als die entsprechenden Singulett-Zustände auf. Man kann daher annehmen, dass Triplett-Zustände für den ersten Reaktionsschritt keinerlei Rolle spielen. Für den zweiten Reaktionsschritt ergibt sich jedoch ein anderes Bild. So sind mit beiden verwendeten Methoden die Triplett-Zustände der Zwischenstufen und der zweiten Übergangsstrukturen für die Reaktionswege **A** und **B** stabiler als die entsprechenden Singulett-Zustände. Für den Reaktionsweg **A** ergibt sich eine relative Energie zwischen der Triplett- und der Singulett-Zwischenstufe  $\Delta E(\mathbf{14t-14s})$  von  $-3.9 \text{ kcal}\cdot\text{mol}^{-1}$  (B3LYP\*/SHAsvp) bzw.  $-6.5 \text{ kcal}\cdot\text{mol}^{-1}$  (B3LYP/SHAsvp). Beim Reaktionsweg **B** ist der Energieunterschied zwischen der Triplett- und der Singulett-Zwischenstufe  $\Delta E(\mathbf{17t-17s})$  mit  $-12.6 \text{ kcal}\cdot\text{mol}^{-1}$  (B3LYP\*/SHAsvp) bzw.  $-14.1 \text{ kcal}\cdot\text{mol}^{-1}$  (B3LYP/SHAsvp) noch ausgeprägter. Für den Reaktionsweg **C** ergibt die B3LYP/SHAsvp-Rechnung dagegen annähernd gleiche Energien für Singulett und Triplett,  $\Delta E(\mathbf{19t-19s}) = -1.4 \text{ kcal}\cdot\text{mol}^{-1}$ , wohingegen mit B3LYP\*/SHAsvp die Singulett-Zustände energetisch begünstigt sind,  $\Delta E(\mathbf{19t-19s}) = 2.9 \text{ kcal}\cdot\text{mol}^{-1}$ . Generell ergibt sich bei den B3LYP\*-Rechnungen, verglichen mit B3LYP, eine Stabilisierung der Singulett-Zustände relativ zu den Triplett-Zuständen.

Im Folgenden werden die möglichen Reaktionswege anhand der mit B3LYP/SHAsvp berechneten Energien besprochen. Die mit B3LYP\*/SHAsvp erhaltenen Ergebnisse sind zusätzlich in Klammern angegeben. Die Rechnungen deuten darauf hin, dass für die Reaktionswege **A** und **B** nach dem ersten Reaktionsschritt ein Singulett-Triplett-Übergang stattfinden könnte. Die Triplett-Zwischenstufe würde dann über einen Triplett-Übergangszustand und einen weiteren Singulett-Triplett-Übergang zum Singulett-Produkt führen. Die Aktivierungsenergien des zweiten Reaktionsschrittes wären dadurch von 7.0 (6.2) kcal·mol<sup>-1</sup> (**14s**  $\square$  **21s**<sup>#</sup>) auf 1.5 (1.5) kcal·mol<sup>-1</sup> (**14t**  $\square$  **21t**<sup>#</sup>) für den Reaktionsweg **A** bzw. von 3.7 (3.1) kcal·mol<sup>-1</sup> (**17s**  $\square$  **25s**<sup>#</sup>) auf 2.1 (2.8) kcal·mol<sup>-1</sup> (**17t**  $\square$  **25t**<sup>#</sup>) für den Reaktionsweg **B** erniedrigt. Der erste Übergangszustand mit einer Aktivierungsenergie von 9.0 (8.3) kcal·mol<sup>-1</sup> (**16s**  $\square$  **24s**<sup>#</sup>) stellt somit den geschwindigkeitsbestimmenden Schritt für

den Reaktionsweg **B** dar. Beim Reaktionsweg **A** besitzen dagegen beide Singulett-Übergangszustände nahezu dieselbe Aktivierungsenergie (**13s**  $\square$  **20s<sup>#</sup>**, 6.8 (5.8) kcal·mol<sup>-1</sup>), die zudem deutlich niedriger ist als die für den geschwindigkeitsbestimmenden Schritt von **B**. Beim Reaktionsweg **C** ist der zweite Schritt mit einer Aktivierungsenergie von 10.8 (10.0) kcal·mol<sup>-1</sup> (**19s**  $\square$  **29s<sup>#</sup>**) geschwindigkeitsbestimmend. Der erste Schritt besitzt dagegen eine Aktivierungsbarriere von nur 4.6 (3.9) kcal·mol<sup>-1</sup> (**16s**  $\square$  **28s<sup>#</sup>**), führt jedoch zu einer relativ instabilen Zwischenstufe **19s** mit einer relativen Energie zum Edukt von 3.0 (2.7) kcal·mol<sup>-1</sup>. Man kann sich vorstellen, dass **19s** zwar gebildet wird, jedoch wieder zum Edukt rückreagiert, da die Folgereaktion energetisch erschwert ist. Anders ausgedrückt kann man sich vorstellen, dass **19s** im Gleichgewicht mit den Edukten **16s** und **13s** vorliegt. Der kinetisch bevorzugte Reaktionsweg ist somit der Reaktionsweg **A** mit einer Aktivierungsbarriere von  $\sim 7$  kcal·mol<sup>-1</sup>. Das so gebildete Kopf-Schwanz-1,3-Cycloaddukt **15s** ist jedoch um 12.8 (11.9) kcal·mol<sup>-1</sup> weniger stabil als das alternative Kopf-Kopf-1,2-Cycloaddukt **18s**.

Die Rechnungen bestätigen die eingangs aufgestellte Vermutung, dass die Bildung der Kopf-Schwanz-1,3-Cycloaddukte kinetisch, jedoch nicht thermodynamisch, bevorzugt ist. Für diese Betrachtungen spielt es keine Rolle, ob es nun zu einem Singulett-Triplett-Übergang kommt oder nicht, da die geschwindigkeitsbestimmenden Schritte aller drei Reaktionswege über Singulett-Übergangszustände verlaufen. Ein Unterschied wäre jedoch, dass die Rückreaktion des ersten Reaktionsschrittes von **A** und **B** nach einem Singulett-Triplett-Übergang deutlich erschwert wäre.

Die ursprünglich als mögliche Triplett-Zwischenstufen in Betracht gezogenen Strukturen **22t** und **26t** besitzen nach den B3LYP/SHAsvp-Rechnungen eine um -1.0 bzw. -0.8 kcal·mol<sup>-1</sup> niedrigere Energie als die letztendlich als Zwischenstufen identifizierten Strukturen **14t** und **17t**. Bei den B3LYP\*/SHAsvp-Rechnungen sind die  $\eta^2$ -gebundenen Strukturen **22t** und **26t** dagegen um 1.9 bzw. 4.5 kcal·mol<sup>-1</sup> weniger stabil als die  $\eta^4$ -gebundenen Triplett-Zwischenstufen **14t** und **17t**. Sie sind dabei auch um 0.4 bzw. 1.7 kcal·mol<sup>-1</sup> weniger stabil als die Übergangsstrukturen **21t<sup>#</sup>** und **25t<sup>#</sup>**.

In Abbildung 68 sind die berechneten Spindichteverteilungen der Triplett-Zwischenstufen **14t**, **17t** und **19t** und der  $\eta^2$ -gebundenen Strukturen **22t** und **26t** dargestellt.<sup>91</sup> Die Spindichte ist dabei in den  $\eta^4$ -gebundenen Zwischenstufen **14t** und **17t** zu einem nicht unerheblichen Anteil an den Phosphoratomen lokalisiert. So beträgt die Summe der atomaren Mulliken-Spindichten auf den Phosphoratomen in **14t** 1.06 e<sup>-</sup> und in **17t** 1.48 e<sup>-</sup> und die atomare Spindichte auf Kobalt 0.89 (**14t**) bzw. 0.44 e<sup>-</sup> (**17t**) (B3LYP\*/SHAsvp). Demgegenüber ist die

Spindichte in den  $\eta^2$ -gebundenen Strukturen **22t** und **26t** und der ebenfalls  $\eta^2$ -gebundenen Zwischenstufe **19t** überwiegend metallzentriert. Aufgrund dieser Ergebnisse kann man vermuten, dass der kobaltkoordinierte Ligand in **14t** und **17t** in seiner Reaktivität in Bezug auf den Ringschluss dem freien Radikalanion oder der freien Triplett-Form ähnelt.

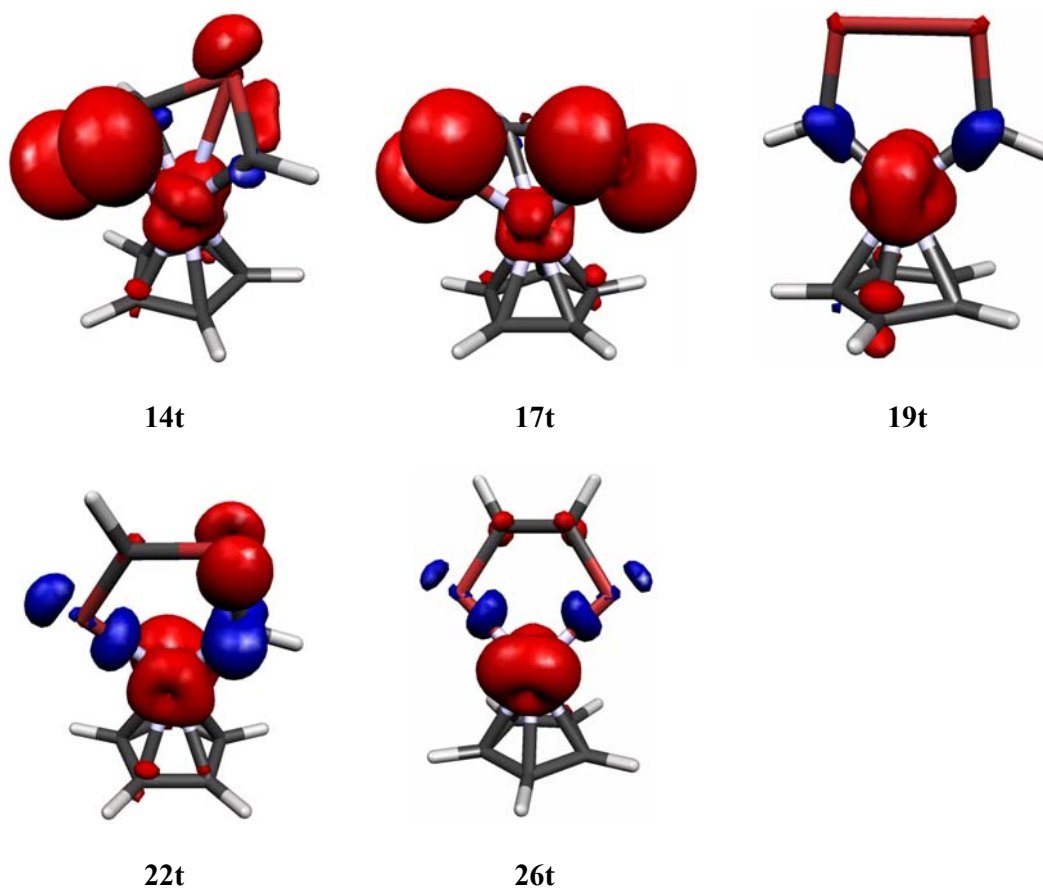

**Abbildung 10.** Berechnete Spindichteverteilung der Triplett-Zwischenstufen **14t**, **17t** und **19t** und der  $\eta^2$ -gebundenen Strukturen **22t** und **26t**. Isosflächen bei einer Spindichte von  $0.005 e^-b^{-3}$  ( $b$  = atomare Einheit Bohr).

**Tabelle 1.** Mit *B3LYP/SHAsvp* und *B3LYP\*/SHAsvp* berechnete absolute Energien  $E$  [Hartree], Nullpunktschwingungsenergien  $ZPE$  [kcal·mol<sup>-1</sup>], relative Energien  $E_{rel}$  [kcal·mol<sup>-1</sup>] und  $ZPE$  korrigierte relative Energien  $E_{rel,ZPE}$  [kcal·mol<sup>-1</sup>].

| Struktur               | <i>B3LYP</i> |       |           |               | <i>B3LYP*</i> |           |
|------------------------|--------------|-------|-----------|---------------|---------------|-----------|
|                        | $E$          | $ZPE$ | $E_{rel}$ | $E_{rel,ZPE}$ | $E$           | $E_{rel}$ |
| <b>13s</b>             | -2335.81049  | 72.6  | 0.0       | 0.0           | -2335.28760   | 0.0       |
| <b>13t</b>             | -2335.79368  | 71.0  | 10.5      | 8.9           | -2335.26490   | 14.2      |
| <b>20s<sup>#</sup></b> | -2335.79966  | 72.5  | 6.8       | 6.7           | -2335.27832   | 5.8       |
| <b>20t<sup>#</sup></b> | -2335.77835  | 70.5  | 20.2      | 18.1          | -2335.26043   | 17.0      |
| <b>14s</b>             | -2335.81088  | 73.5  | -0.2      | 0.7           | -2335.28901   | -0.9      |
| <b>14t</b>             | -2335.82123  | 73.3  | -6.7      | -6.0          | -2335.29517   | -4.8      |
| <b>22t</b>             | -2335.82274  | 72.8  | -7.7      | -7.5          | -2335.29228   | -2.9      |
| <b>23t<sup>#</sup></b> | -2335.81278  | 72.6  | -1.4      | -1.4          | -2335.28635   | 0.8       |
| <b>21s<sup>#</sup></b> | -2335.79959  | 72.8  | 6.8       | 7.0           | -2335.27908   | 5.3       |
| <b>21t<sup>#</sup></b> | -2335.81881  | 73.1  | -5.2      | -4.7          | -2335.29281   | -3.3      |
| <b>15s</b>             | -2335.88602  | 74.9  | -47.4     | -45.1         | -2335.36264   | -47.9     |
| <b>15t</b>             | -2335.84303  | 73.5  | -20.4     | -19.5         | -2335.31544   | -17.5     |
| <b>16s</b>             | -2335.81051  | 72.6  | 0.0       | 0.0           | -2335.28777   | -0.1      |
| <b>16t</b>             | -2335.79429  | 70.9  | 10.2      | 8.5           | -2335.26491   | 14.2      |
| <b>24s<sup>#</sup></b> | -2335.79609  | 72.8  | 9.0       | 9.2           | -2335.27457   | 8.2       |
| <b>24t<sup>#</sup></b> | -2335.79125  | 70.7  | 12.1      | 10.2          | -2335.26150   | 16.4      |
| <b>17s</b>             | -2335.83226  | 74.2  | -13.7     | -12.1         | -2335.31042   | -14.3     |
| <b>17t</b>             | -2335.85484  | 74.6  | -27.8     | -25.8         | -2335.33060   | -27.0     |
| <b>26t</b>             | -2335.85346  | 73.9  | -27.0     | -25.7         | -2335.32342   | -22.5     |
| <b>27t<sup>#</sup></b> | -2335.84097  | 73.4  | -19.1     | -18.3         | -2335.31508   | -17.2     |
| <b>25s<sup>#</sup></b> | -2335.82639  | 74.0  | -10.0     | -8.6          | -2335.30552   | -11.2     |
| <b>25t<sup>#</sup></b> | -2335.85143  | 73.7  | -25.7     | -24.6         | -2335.32614   | -24.2     |
| <b>18s</b>             | -2335.90635  | 75.4  | -60.2     | -57.4         | -2335.38286   | -59.8     |
| <b>18t</b>             | -2335.86628  | 73.5  | -35.0     | -34.1         | -2335.33569   | -30.2     |
| <b>28s<sup>#</sup></b> | -2335.80319  | 72.5  | 4.6       | 4.5           | -2335.28149   | 3.8       |
| <b>28t<sup>#</sup></b> | -2335.78532  | 71.3  | 15.8      | 14.5          | -2335.25938   | 17.7      |
| <b>19s</b>             | -2335.80564  | 73.1  | 3.0       | 3.5           | -2335.28350   | 2.6       |
| <b>19t</b>             | -2335.80793  | 72.7  | 1.6       | 1.7           | -2335.27876   | 5.5       |
| <b>29s<sup>#</sup></b> | -2335.78846  | 72.4  | 13.8      | 13.6          | -2335.26747   | 12.6      |
| <b>29t<sup>#</sup></b> | -2335.78401  | 71.8  | 16.6      | 15.8          | -2335.25893   | 18.0      |

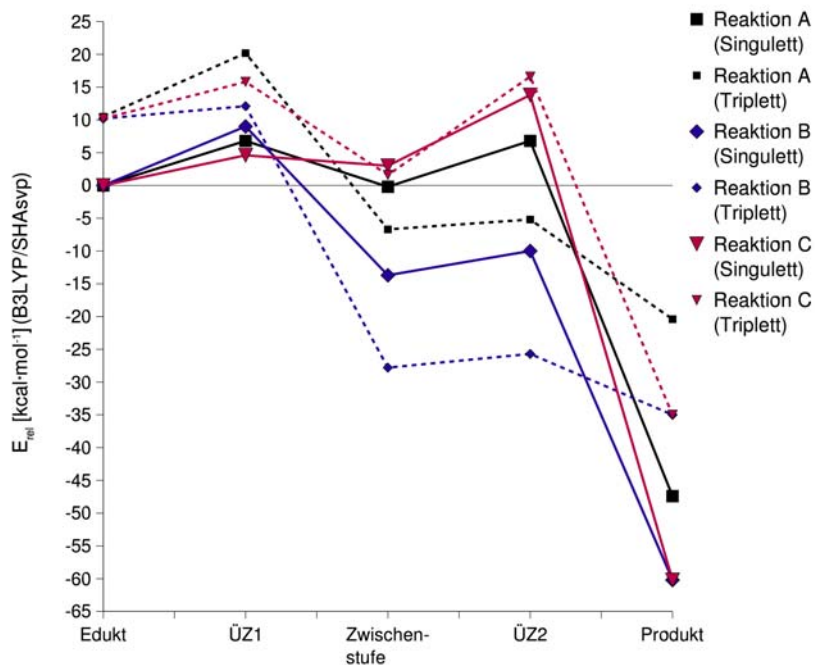

**Abbildung 11.** Mit B3LYP/SHAsvp berechnete relative Energien der Edukte, Produkte, Zwischenstufen und der beiden Übergangsstrukturen (ÜZ1 und ÜZ2) der drei untersuchten Reaktionswege A, B und C.

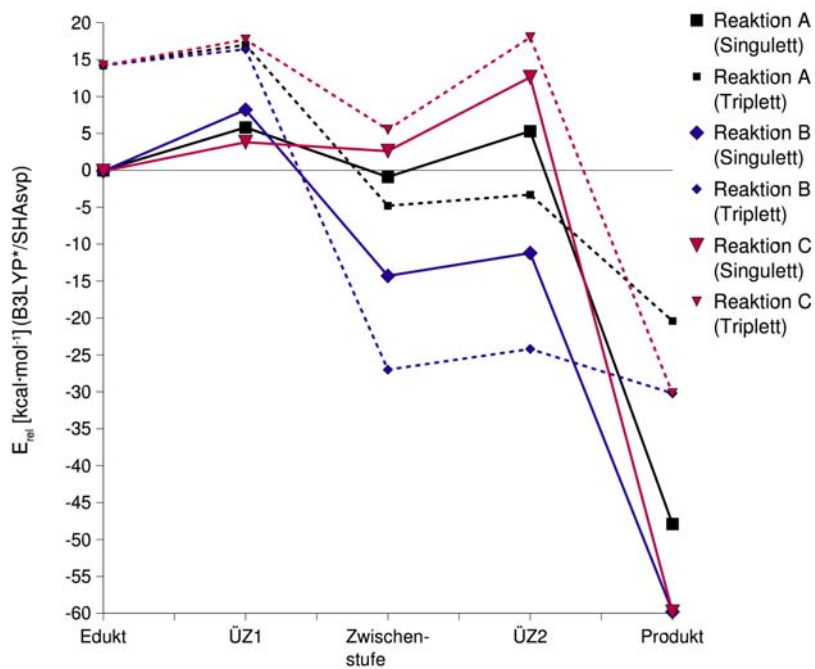

**Abbildung 12.** Mit B3LYP\*/SHAsvp berechnete relative Energien der Edukte, Produkte, Zwischenstufen und der beiden Übergangsstrukturen (ÜZ1 und ÜZ2) der drei untersuchten Reaktionswege A, B und C.

Die wichtigsten berechneten strukturellen Parameter sind in Tabelle 25 (B3LYP/SHAsvp) und 26 (B3LYP\*/SHAsvp) aufgelistet. Im Folgenden werden die B3LYP-Ergebnisse besprochen, die Atome sind dabei nach Abbildung 71 nummeriert.

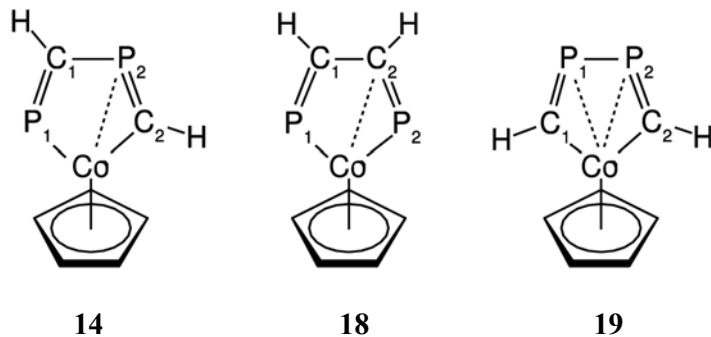

**Abbildung 13.** Nummerierung der Atome in den Zwischenstufen **14**, **18** und **19** der möglichen Reaktionswege **A**, **B** und **C**.

Beim Reaktionsweg **A** wird im ersten Schritt eine C-P-Bindung zwischen den anfangs  $\pi$ -gebundenen Phosphaalkinen gebildet. Der betreffende C1-P2-Abstand verringert sich dabei von 3.064 (**13s**) über 2.211 (**20s<sup>#</sup>**) auf 1.826 Å (**14s**), wohingegen die P1-C1- und P2-C2-Bindungen von 1.609 auf 1.689 bzw. 1.742 Å etwas verlängert werden. Die Co-P1- und Co-C2-Bindungen werden dabei von 2.381 auf 2.266 Å bzw. von 1.983 auf 1.770 Å verkürzt, während die Co-C1- und Co-P2-Abstände von 1.987 auf 2.893 Å bzw. von 2.386 auf 2.612 Å deutlich zunehmen. Die Co-P2-Bindung wird dabei also nicht vollständig gebrochen. Im zweiten Schritt wird schließlich die C2-P1-Bindung gebildet. Dabei verringert sich der C2-P1-Abstand von 3.055 (**14s**) auf 1.811 Å (**15s**), wobei sich alle P-C-Bindungslängen im Liganden auf 1.811 bzw. 1.810 Å nahezu angleichen. Die Co-C- und Co-P-Abstände gleichen sich dabei ebenfalls auf 2.041 bzw. 2.274 Å an. Die energetisch tiefer liegende Triplett-Zwischenstufe **14t** unterscheidet sich hauptsächlich durch die Co-C1-Bindung mit einer Bindungslänge von 2.072 Å von **14s** (Co-C1 2.893 Å), so dass sich hier eine  $\eta^4$ -gebundene Struktur ergibt, mit einem jedoch relativ langen Co-P2-Abstand von 2.647 Å. Bei der Reaktion **14t**  $\square$  **21t<sup>#</sup>**  $\square$  **15t** verringert sich der C2-P1-Abstand von 2.943 über 2.541 auf 1.838 Å. Das energetisch ungünstigere Triplett-Produkt **15t** besitzt im Gegensatz zu **15s** einen deutlich verlängerten Co-P2-Abstand von 2.622 Å, was sich auch auf die P-C-Bindungen auswirkt, die sich mit P1-C-Bindungslängen von 1.838 Å und P2-C-Bindungslängen von 1.844 Å etwas unterscheiden. Die Co-P1-Bindung besitzt jedoch mit 2.276 Å eine ähnliche Bindungslänge wie in **15s** (2.274 Å), während die Co-C-Bindungen mit 1.981 Å sogar etwas

kürzer sind. Die strukturelle Ähnlichkeit zwischen **14t** und **15t** ist auffällig. So ist der Co-P2-Abstand mit 2.647 Å und 2.622 Å in beiden Strukturen nahezu gleich und auch die übrigen Abstände zwischen Co und dem Liganden sind vergleichbar. Die Zwischenstufe **14t** besitzt also bereits eine ähnliche Koordination am Co wie das Triplett-Produkt **15t**. Die beiden Strukturen unterscheiden sich also im Wesentlichen nur durch den C2-P1-Abstand.

Beim alternativen Reaktionsweg **B** wird im ersten Schritt eine C-C-Bindung gebildet. Der C1-C2-Abstand verkürzt sich dabei von 2.807 (**16s**) über 1.971 (**24s<sup>#</sup>**) auf 1.449 Å (**25s**), wohingegen die P1-C1- und P2-C2-Bindungen von 1.610 auf 1.709 bzw. 1.759 Å verlängert werden. Die Co-P1- und Co-P2-Bindungen werden dabei von 2.390 auf 2.259 bzw. 2.101 Å kürzer, während die Co-C1- und Co-C2-Abstände von 1.976 auf 2.664 bzw. 2.288 Å deutlich länger werden. Die Co-C2-Bindung wird dabei also nicht vollständig gebrochen. Im zweiten Schritt wird die P-P-Bindung gebildet, wobei sich der P-P-Abstand von 3.370 (**17s**) auf 2.254 Å (**18s**) verringert. Es entsteht ein symmetrisches Produkt mit P-C-Abständen von 1.819 Å, einem C1-C2-Abstand von 1.419 Å und Co-C- und Co-P-Abständen von 2.031 bzw. 2.303 Å. Die energetisch tiefer liegende Triplett-Zwischenstufe **17t** besitzt eine  $\eta^4$ -gebundene Struktur mit nahezu gleich langen Co-C1- und Co-C2-Abständen von 2.080 bzw. 2.078 Å und Co-P1- und Co-P2-Abständen von 2.249 und 2.248 Å. Sie unterscheidet sich hauptsächlich durch den wesentlich kürzeren Co-C1-Abstand von 2.080 Å von **17s** (Co-C1 2.664 Å). Bei der Reaktion **17t**  $\square$  **25t<sup>#</sup>**  $\square$  **18t** verringert sich der P-P-Abstand von 3.132 über 2.814 auf 2.362 Å. Das, verglichen mit **18s**, energetisch ungünstigere Triplett-Produkt **18t** besitzt im Gegensatz zu **18s** (und auch **17t**) längere Co-C- und Co-P-Abstände von 2.125 bzw. 2.416 Å. Die P-C-Bindungen im Liganden sind mit 1.786 Å etwas kürzer als in **18s**, wohingegen die C-C-Bindung mit 1.436 Å und die P-P-Bindung mit 2.362 Å etwas länger ist.

Beim Reaktionsweg **C**, dessen Edukt und Produkt denen aus **B** entsprechen, wird im ersten Schritt eine P-P-Bindung mit einem Abstand von 2.357 Å gebildet. Die dabei gebildete Singulett-Zwischenstufe **19s** besitzt nur geringfügig verlängerte P-C-Abstände von 1.682 Å. Die Co-C-Abstände werden mit 1.845 Å etwas verkürzt, die Co-P-Abstände mit 2.726 Å jedoch deutlich länger.

**Tabelle 2.** Mit B3LYP/SHAsvp berechnete Bindungslängen bzw. interatomare Abstände [ $\text{\AA}$ ] der untersuchten Minima und Übergangsstrukturen.

| <i>Struktur</i>         | <i>Co-P1</i> | <i>Co-C1</i> | <i>Co-P2</i> | <i>Co-C2</i> | <i>P1-C1</i> | <i>P2-C2</i> | <i>C1-P2</i> | <i>C2-P1</i> |
|-------------------------|--------------|--------------|--------------|--------------|--------------|--------------|--------------|--------------|
| <b>13s</b>              | 2.381        | 1.987        | 2.386        | 1.983        | 1.609        | 1.609        | 3.064        | 3.078        |
| <b>13t</b>              | 2.508        | 2.105        | 2.475        | 2.039        | 1.595        | 1.597        | 3.023        | 3.998        |
| <b>20s<sup>#</sup></b>  | 2.327        | 2.024        | 2.391        | 1.908        | 1.652        | 1.638        | 2.211        | 3.252        |
| <b>20t<sup>#</sup></b>  | 2.542        | 2.089        | 2.617        | 2.044        | 1.655        | 1.625        | 2.228        | 3.739        |
| <b>14s</b>              | 2.266        | 2.893        | 2.612        | 1.770        | 1.689        | 1.742        | 1.826        | 3.055        |
| <b>14t</b>              | 2.303        | 2.072        | 2.647        | 1.849        | 1.755        | 1.712        | 1.849        | 2.943        |
| <b>22t</b>              | 2.327        | 3.110        | 3.228        | 1.911        | 1.702        | 1.707        | 1.822        | 3.038        |
| <b>23t<sup>#</sup></b>  | 2.239        | 2.531        | 2.848        | 1.833        | 1.739        | 1.728        | 1.814        | 3.028        |
| <b>21s<sup>#</sup></b>  | 2.309        | 2.885        | 2.327        | 1.704        | 1.696        | 1.821        | 1.848        | 2.677        |
| <b>21t<sup>#</sup></b>  | 2.278        | 2.043        | 2.603        | 1.851        | 1.777        | 1.738        | 1.838        | 2.541        |
| <b>15s</b>              | 2.274        | 2.041        | 2.274        | 2.041        | 1.810        | 1.811        | 1.810        | 1.811        |
| <b>exp.<sup>a</sup></b> | 2.243        | 2.058        | 2.243        | 2.058        | 1.797        | 1.797        | 1.797        | 1.797        |
| <b>15t</b>              | 2.276        | 1.981        | 2.622        | 1.981        | 1.838        | 1.844        | 1.844        | 1.838        |
| <i>Struktur</i>         | <i>Co-P1</i> | <i>Co-C1</i> | <i>Co-P2</i> | <i>Co-C2</i> | <i>P1-C1</i> | <i>P2-C2</i> | <i>C1-C2</i> | <i>P1-P2</i> |
| <b>16s</b>              | 2.390        | 1.976        | 2.390        | 1.976        | 1.610        | 1.610        | 2.807        | 3.309        |
| <b>16t</b>              | 2.495        | 2.083        | 2.495        | 2.083        | 1.593        | 1.593        | 3.625        | 3.340        |
| <b>24s<sup>#</sup></b>  | 2.353        | 1.979        | 2.353        | 1.979        | 1.642        | 1.642        | 1.971        | 3.594        |
| <b>24t<sup>#</sup></b>  | 2.478        | 2.075        | 2.478        | 2.075        | 1.598        | 1.598        | 2.962        | 3.732        |
| <b>17s</b>              | 2.259        | 2.664        | 2.101        | 2.288        | 1.709        | 1.759        | 1.449        | 3.370        |
| <b>17t</b>              | 2.249        | 2.080        | 2.248        | 2.078        | 1.784        | 1.784        | 1.422        | 3.132        |
| <b>26t</b>              | 2.293        | 3.155        | 2.293        | 3.155        | 1.721        | 1.721        | 1.427        | 3.257        |
| <b>27t<sup>#</sup></b>  | 2.178        | 2.562        | 2.199        | 2.507        | 1.758        | 1.763        | 1.421        | 3.259        |
| <b>25s<sup>#</sup></b>  | 2.350        | 2.656        | 2.029        | 2.057        | 1.712        | 1.811        | 1.452        | 3.069        |
| <b>25t<sup>#</sup></b>  | 2.241        | 2.116        | 2.241        | 2.117        | 1.784        | 1.784        | 1.420        | 2.814        |
| <b>18s</b>              | 2.303        | 2.031        | 2.303        | 2.031        | 1.819        | 1.819        | 1.419        | 2.254        |
| <b>18t</b>              | 2.416        | 2.125        | 2.416        | 2.125        | 1.786        | 1.787        | 1.436        | 2.362        |
| <b>28s<sup>#</sup></b>  | 2.504        | 1.875        | 2.504        | 1.875        | 1.654        | 1.654        | 2.901        | 2.523        |
| <b>28t<sup>#</sup></b>  | 3.119        | 1.919        | 2.392        | 1.976        | 1.670        | 1.625        | 3.145        | 2.786        |
| <b>19s</b>              | 2.726        | 1.845        | 2.726        | 1.845        | 1.682        | 1.682        | 2.857        | 2.357        |
| <b>19t</b>              | 3.138        | 1.923        | 3.139        | 1.926        | 1.685        | 1.685        | 2.912        | 2.317        |
| <b>29s<sup>#</sup></b>  | 3.032        | 1.892        | 2.345        | 1.770        | 1.696        | 1.740        | 2.537        | 2.363        |
| <b>29t<sup>#</sup></b>  | 2.784        | 1.841        | 2.353        | 1.921        | 1.726        | 1.742        | 2.255        | 2.310        |

<sup>a</sup> Experimentelle Bindungslängen für das *t*Bu substituierte Analogon zu **15s**.<sup>101</sup>



*Tabelle 3. Mit B3LYP\*/SHAsvp berechnete Bindungslängen bzw. interatomare Abstände [ $\text{\AA}$ ] der untersuchten Minima und Übergangsstrukturen.*

| <i>Struktur</i>         | <i>Co-P1</i> | <i>Co-C1</i> | <i>Co-P2</i> | <i>Co-C2</i> | <i>P1-C1</i> | <i>P2-C2</i> | <i>C1-P2</i> | <i>C2-P1</i> |
|-------------------------|--------------|--------------|--------------|--------------|--------------|--------------|--------------|--------------|
| <b>13s</b>              | 2.381        | 1.981        | 2.387        | 1.976        | 1.614        | 1.614        | 3.051        | 3.078        |
| <b>13t</b>              | 2.505        | 2.067        | 2.448        | 2.003        | 1.603        | 1.605        | 2.986        | 3.940        |
| <b>20s<sup>#</sup></b>  | 2.329        | 2.016        | 2.382        | 1.903        | 1.654        | 1.642        | 2.223        | 3.246        |
| <b>20t<sup>#</sup></b>  | 3.147        | 1.963        | 2.377        | 1.904        | 1.664        | 1.629        | 2.493        | 3.877        |
| <b>14s</b>              | 2.264        | 2.905        | 2.562        | 1.759        | 1.691        | 1.753        | 1.825        | 3.055        |
| <b>14t</b>              | 2.291        | 2.066        | 2.637        | 1.842        | 1.761        | 1.716        | 1.848        | 2.935        |
| <b>22t</b>              | 2.283        | 3.095        | 3.216        | 1.885        | 1.712        | 1.718        | 1.812        | 2.986        |
| <b>23t<sup>#</sup></b>  | 2.221        | 2.519        | 2.830        | 1.823        | 1.744        | 1.734        | 1.812        | 3.018        |
| <b>21s<sup>#</sup></b>  | 2.306        | 2.893        | 2.327        | 1.706        | 1.700        | 1.822        | 1.850        | 2.672        |
| <b>21t<sup>#</sup></b>  | 2.270        | 2.040        | 2.594        | 1.845        | 1.781        | 1.743        | 1.838        | 2.533        |
| <b>15s</b>              | 2.274        | 2.038        | 2.274        | 2.039        | 1.813        | 1.814        | 1.813        | 1.814        |
| <b>exp.<sup>a</sup></b> | 2.243        | 2.058        | 2.243        | 2.058        | 1.797        | 1.797        | 1.797        | 1.797        |
| <b>15t</b>              | 2.275        | 1.970        | 2.618        | 1.970        | 1.844        | 1.848        | 1.848        | 1.844        |
| <i>Struktur</i>         | <i>Co-P1</i> | <i>Co-C1</i> | <i>Co-P2</i> | <i>Co-C2</i> | <i>P1-C1</i> | <i>P2-C2</i> | <i>C1-C2</i> | <i>P1-P2</i> |
| <b>16s</b>              | 2.391        | 1.967        | 2.391        | 1.967        | 1.615        | 1.615        | 2.811        | 3.278        |
| <b>16t</b>              | 2.468        | 2.052        | 2.468        | 2.052        | 1.600        | 1.600        | 3.560        | 3.329        |
| <b>24s<sup>#</sup></b>  | 2.352        | 1.974        | 2.352        | 1.974        | 1.644        | 1.644        | 1.985        | 3.595        |
| <b>24t<sup>#</sup></b>  | 2.442        | 2.023        | 2.442        | 2.023        | 1.608        | 1.608        | 2.991        | 3.674        |
| <b>17s</b>              | 2.264        | 2.672        | 2.094        | 2.254        | 1.710        | 1.767        | 1.449        | 3.372        |
| <b>17t</b>              | 2.247        | 2.074        | 2.246        | 2.072        | 1.787        | 1.788        | 1.424        | 3.130        |
| <b>26t</b>              | 2.257        | 3.150        | 2.257        | 3.150        | 1.732        | 1.732        | 1.422        | 3.208        |
| <b>27t<sup>#</sup></b>  | 2.179        | 2.527        | 2.179        | 2.527        | 1.765        | 1.765        | 1.420        | 3.263        |
| <b>25s<sup>#</sup></b>  | 2.351        | 2.666        | 2.032        | 2.053        | 1.714        | 1.816        | 1.453        | 3.070        |
| <b>25t<sup>#</sup></b>  | 2.244        | 2.109        | 2.244        | 2.110        | 1.788        | 1.788        | 1.422        | 2.763        |
| <b>18s</b>              | 2.304        | 2.028        | 2.304        | 2.028        | 1.822        | 1.822        | 1.421        | 2.261        |
| <b>18t</b>              | 2.398        | 2.112        | 2.398        | 2.112        | 1.792        | 1.792        | 1.434        | 2.369        |
| <b>28s<sup>#</sup></b>  | 2.512        | 1.866        | 2.512        | 1.866        | 1.662        | 1.662        | 2.887        | 2.491        |
| <b>28t<sup>#</sup></b>  | 3.122        | 1.910        | 2.374        | 1.954        | 1.675        | 1.630        | 3.127        | 2.826        |
| <b>19s</b>              | 2.716        | 1.841        | 2.716        | 1.841        | 1.685        | 1.685        | 2.858        | 2.354        |
| <b>19t</b>              | 3.111        | 1.912        | 3.112        | 1.917        | 1.685        | 1.685        | 2.938        | 2.331        |
| <b>29s<sup>#</sup></b>  | 3.045        | 1.886        | 2.342        | 1.767        | 1.702        | 1.742        | 2.527        | 2.362        |
| <b>29t<sup>#</sup></b>  | 2.768        | 1.835        | 2.352        | 1.910        | 1.728        | 1.747        | 2.254        | 2.310        |

<sup>a</sup> Experimentelle Bindungslängen für das tBu substituierte Analogon zu **15s**.<sup>101</sup>

### 2.2.4 Zusammenfassung

Die DFT-Rechnungen an dem vereinfachten Modellsystem weisen darauf hin, dass die Bildung von Kopf-Schwanz-1,3-Cycloaddukten bei der Cyclodimerisierung von Phosphaalkinen in der Koordinationssphäre von Cyclopentadienyl-Kobalt kinetisch begünstigt ist, jedoch zu den thermodynamisch weniger stabilen Produkten führt. Die Rechnungen weisen zudem darauf hin, dass das Kobalt in den Zwischenstufen nicht wie erwartet  $\eta^2$ -gebunden ist und einen planaren Kobalto-diphospha-cyclopentadienylring bildet, sondern eine gewisse Neigung besitzt, Bindungen zu weiteren Atomen im Ring zu knüpfen, und somit  $\eta^3$ - oder  $\eta^4$ -gebunden ist. Bei der Reaktion kommt es vermutlich zu einem Singulett-Triplett-Übergang, so dass sie intermediär über eine Triplett-Zwischenstufe und einen nachfolgenden Triplett-Übergangszustand verläuft. Dieser Singulett-Triplett-Übergang sollte jedoch keinen Einfluss auf die Produkteverteilung haben, da an den geschwindigkeitsbestimmenden Schritten durchweg Singulett-Übergangszustände beteiligt sind.

Das in dieser Studie verwendete sehr vereinfachte Modellsystem weicht jedoch deutlich von den experimentell untersuchten Systemen ab, bei denen in der Regel das sterisch abgeschirmte *tert*-Butylphosphaacetylen verwendet wird. Nachfolgende Studien sollten daher den elektronischen und den sterischen Einfluss der Reste am Phosphaalkin untersuchen. Ersteres könnte durch Austausch der Wasserstoffatome gegen elektronenschiebende Methylgruppen geschehen. Um den sterischen Einfluss zu untersuchen, wären jedoch aufwendige Rechnungen mit *tert*-Butylgruppen notwendig. Daneben wäre der Einfluss des Übergangsmetalls und der Einfluss, den die übrigen Liganden im Komplex ausüben, zu untersuchen.

## 2.3 Tris(2,4-di-*tert*-butyl-1,3-diphosphet)molybdän

### 2.3.1 Einleitung

Die Kristallstruktur von Tris(2,4-di-*tert*-butyl-1,3-diphosphet)molybdän **18**, welches experimentell durch Kokondensation von Mo mit *tert*-Butylphosphaacetylen in geringen Ausbeuten (<5%) zugänglich ist,<sup>102</sup> und das bei der Reaktion von *fac*-[Mo(CH<sub>3</sub>CN)<sub>3</sub>(CO)<sub>3</sub>] mit *tert*-Butylphosphaacetylen als Nebenprodukt entsteht,<sup>103</sup> weist bei Raumtemperatur einen ungewöhnlich nahen P-C-Kontakt von 215.1 pm zwischen zwei Ringen auf.<sup>102</sup> Bei Temperaturniedrigung kommt es in **30** zu einer vollständig reversiblen, topotaktischen Reaktion zwischen den Liganden des Komplexes im Einkristall, wobei sich der P3-C2-Abstand (zur Nummerierung siehe Abbildung 79, Seite 100) bis auf 198.8 pm verkürzt (Abbildung 72).<sup>103</sup>

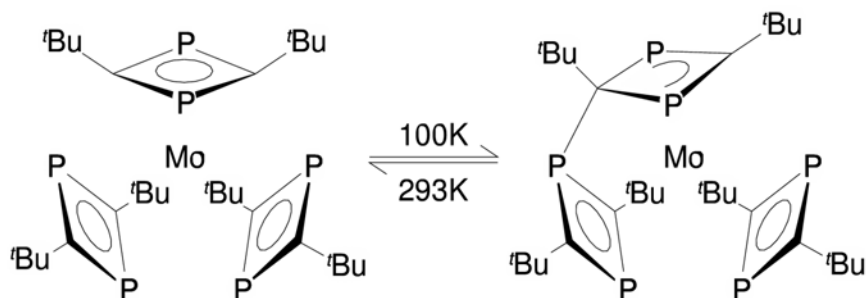

**Abbildung 14.** Schematische Darstellung der topotaktischen Bindungsbildung in **30**.

Aufgrund dieser experimentellen Resultate stellt **30** ein ideales System dar, um die Bindungsverhältnisse beim Angriff eines Phosphoratoms eines übergangsmetallkoordinierten 1,3-Diphosphet-Liganden an ein Kohlenstoffatom eines benachbarten Liganden zu studieren. Hierzu wurden DFT-Rechnungen an den Modellverbindungen Tris(1,3-diphosphet)molybdän **19** und Tris(2,4-dimethyl-1,3-diphosphet)molybdän **20** durchgeführt.

### 2.3.2 Rechenmethoden

Die Rechnungen wurden mit dem in Gaussian98<sup>88</sup> implementierten B3LYP<sup>25,23</sup> drei Parameter Hybrid-Dichtefunktional durchgeführt. Als Basissatz wurde der LanL2DZ-Basissatz verwendet, welcher den *valence double zeta* Basissatz von Dunning und Huzinaga<sup>104</sup> für die erste und zweite Periode und das Los Alamos *effective core potential* (ECP) inklusive zugehöriger *double zeta* Basis<sup>105</sup> für Na-Bi beinhaltet. Dieser Basissatz wurde um einen Satz *d*-Funktionen mit Exponenten von 0.6 und 0.34 auf C und P sowie *p*-Funktionen mit Exponenten von 0.072 auf Mo erweitert (LanL2DZP).<sup>100</sup> Die *nucleus independent chemical shifts* (NICS)<sup>61</sup> wurden mit der *gauge independent atomic orbital* (GIAO)<sup>106</sup> Methode berechnet.

### 2.3.3 Ergebnisse

Für die Modellverbindungen **31** und **32** wurden Pfadrechnungen durchgeführt, wobei der Abstand P3-C2 (gleichbedeutend mit C1-P5) im Bereich von 180 pm bis 260 pm variiert wurde. Die resultierenden Reaktionskoordinaten sind in Abbildung 73 dargestellt.

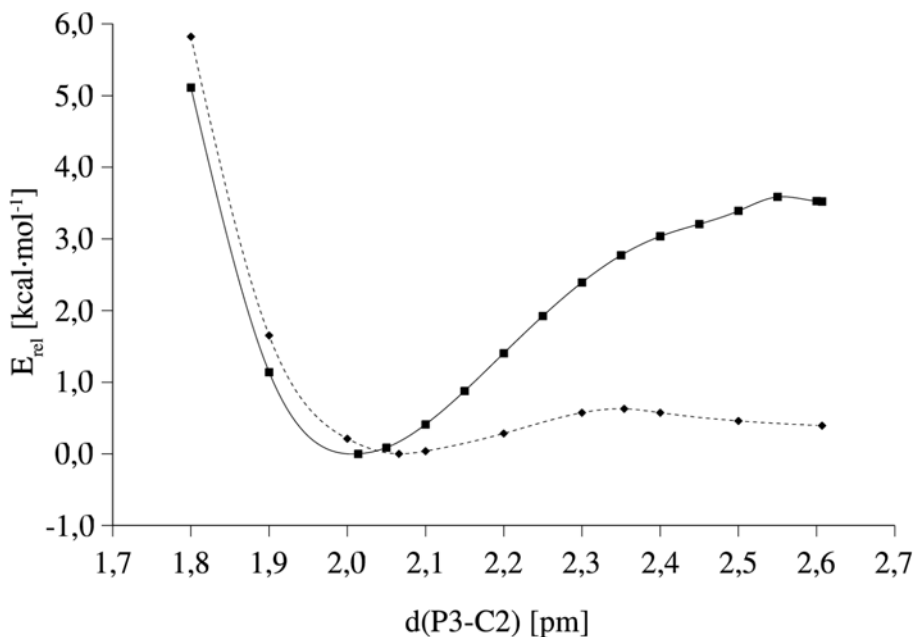

Abbildung 15. Berechnete Reaktionskoordinaten **31a** □ **31b** (gestrichelt) und **32a** □ **32b** (durchgezogen).

Für die Modellverbindung **31** ergeben sich insgesamt drei Minima, zwei gleichwertige  $C_s$ -symmetrische Minima (**31a**, Abbildung 74) mit P3-C2- bzw. P5-C1-Abständen von 206.6 pm und ein um  $0.4 \text{ kcal}\cdot\text{mol}^{-1}$  instabileres  $C_{2v}$ -symmetrisches Minimum (**31b**, Abbildung 74) mit P-C-Abständen von 260.7 pm. Dazwischen liegen zwei gleichwertige Übergangsstrukturen (**31c**, Abbildung 74) mit P3-C2- bzw. P5-C1-Abständen von 235.4 pm und einer relativen Energie zu **31a** von  $0.6 \text{ kcal}\cdot\text{mol}^{-1}$ .

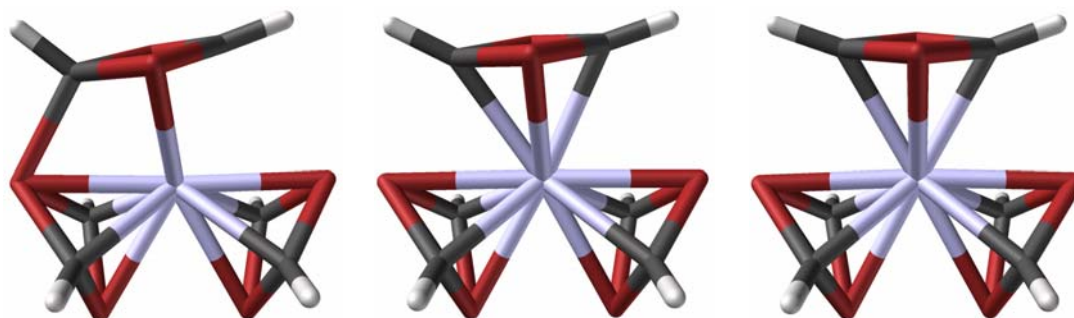

*Abbildung 16. Berechnete Minimumstrukturen 31a (links), 31b (rechts) und Übergangsstruktur 31c<sup>#</sup> (Mitte) von 31.*

Für **32** ergeben sich dagegen nur zwei gleichwertige  $C_s$ -symmetrische Minimumstrukturen mit P3-C2- bzw. P5-C1-Abständen von 201.4 pm (**32a**, Abbildung 75) und eine um  $3.5 \text{ kcal}\cdot\text{mol}^{-1}$  instabilere  $C_{2v}$ -symmetrische Übergangsstruktur mit P-C-Abständen von 260.7 pm (**32b**, Abbildung 75). Die Methylsubstituenten führen somit zu einer Stabilisierung der  $C_s$ -symmetrischen Strukturen relativ zur  $C_{2v}$ -symmetrischen Struktur um etwa  $3 \text{ kcal}\cdot\text{mol}^{-1}$ .

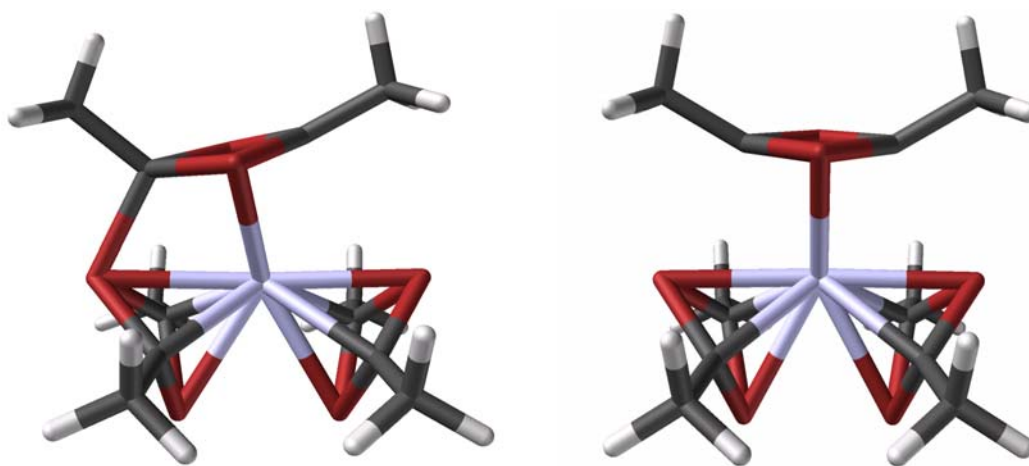

*Abbildung 17. Berechnete Minimumstruktur 32a (links) und Übergangsstruktur 32b (rechts) von 32.*

Um den Einfluss der Methylgruppen näher zu ermitteln, wurde die relative Stabilität der  $C_s$  und  $C_{2v}$ -symmetrischen Strukturen der tetramethylierten Modellverbindung **21** (Abbildung 76) und der dimethylierten Modellverbindung **22** (Abbildung 77) berechnet. Hierbei zeigt sich, dass die  $C_{2v}$ -symmetrische Struktur **33b** analog zu **31b** ein Minimum darstellt, mit einer relativen Energie zu **33a** von  $0.7 \text{ kcal}\cdot\text{mol}^{-1}$ . **34b** ist demgegenüber analog zu **32b** eine Übergangsstruktur, mit einer relativen Energie zu **34a** von  $2.9 \text{ kcal}\cdot\text{mol}^{-1}$ . Es zeigt sich somit, dass für die relative Stabilität der  $C_s$ - und der  $C_{2v}$ -symmetrischen Strukturen die Substitution am P2C2P3C3-Ring entscheidend ist und die Substituenten an den anderen beiden Ringen nur einen geringen Einfluss haben.

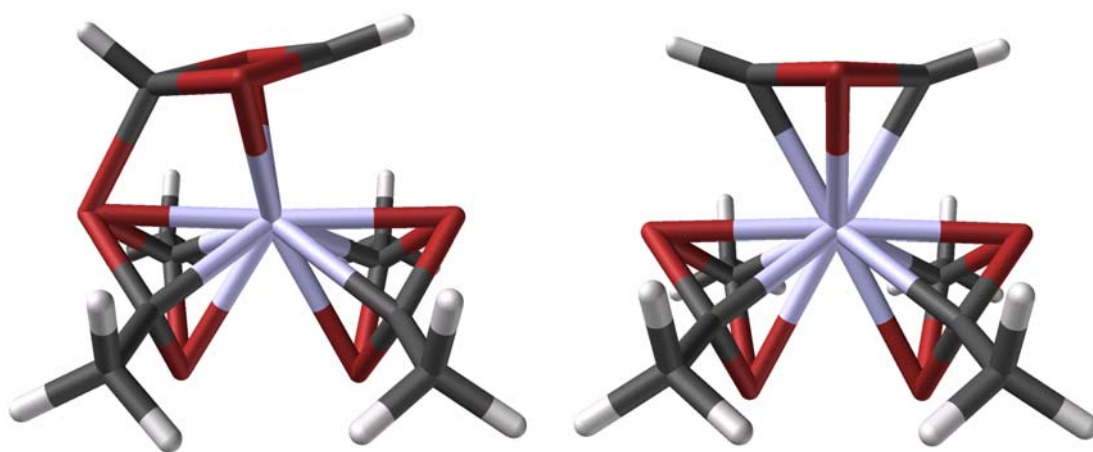

Abbildung 18. Berechnete Minimumstrukturen **33a** (links) und **33b** (rechts) von **33**.

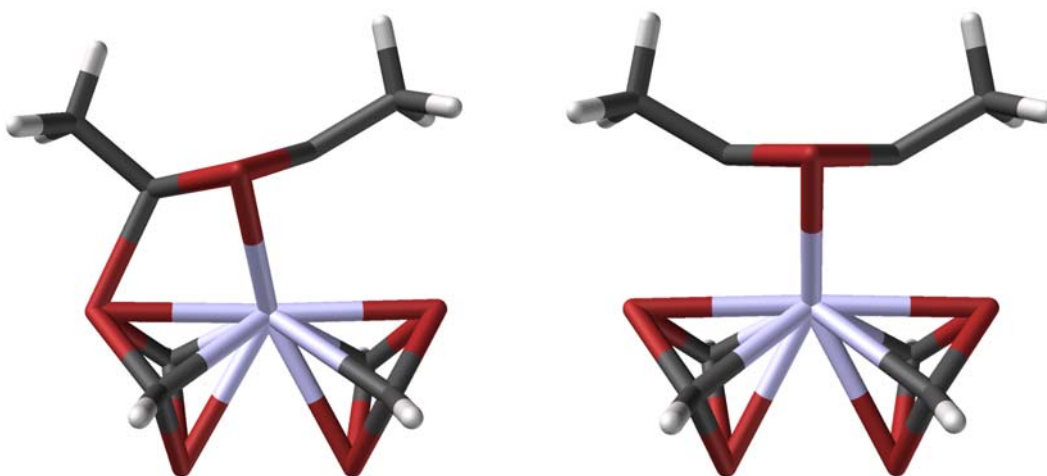

Abbildung 19. Berechnete Minimumstruktur **34a** (links) und Übergangsstruktur **34b** (rechts) von **34**.

In Tabelle 27 sind die wichtigsten Bindungslängen für **31** und **32** den experimentellen Bindungslängen von **30** bei 100 K und 293 K gegenübergestellt. Für das  $C_s$ -symmetrische **32a** ergibt sich eine überraschend gute Übereinstimmung mit der bei 100 K experimentell ermittelten Molekülstruktur. Vor allem die kritischen Abstände C2-P3 und Mo1-C2 werden gut wiedergegeben. Größere Unterschiede ergeben sich allerdings für die nichtbindenden Zwischenringabstände C1-P5 (306.0 vs. 275.9 pm) und P4-P6 (263.0 vs. 278.0 pm). Dies ist vermutlich durch die Vereinfachung der Substituenten (Methyl statt *tert*-Butyl) bedingt und schränkt den Wert der Modellierung nicht signifikant ein.

**Tabelle 4.** Experimentelle Bindungslängen von **30** bei 293 K und 100 K und berechnete Bindungslängen<sup>a</sup> von **31** und **32** (in pm).

|        | <b>30a (100 K)</b> | <b>30b (293 K)</b> | <b>31a (<math>C_s</math>)</b> | <b>31b (<math>C_{2v}</math>)</b> | <b>32a (<math>C_s</math>)</b> | <b>32b (<math>C_{2v}</math>)</b> |
|--------|--------------------|--------------------|-------------------------------|----------------------------------|-------------------------------|----------------------------------|
| Mo1-C2 | 256.69(19)         | 254.2(3)           | 246.7                         | 238.8                            | 256.9                         | 245.8                            |
| C2-P3  | 198.8(2)           | 215.1(4)           | 206.6                         | 260.7                            | 201.4                         | 260.7                            |
| C1-P5  | 275.9(13)          | 251.0(21)          | 290.4                         | 260.7                            | 306.0                         | 260.7                            |
| P4-P6  | 278.0(4)           | 282.2(7)           | 261.8                         | 250.1                            | 263.0                         | 252.3                            |
| C2-P1  | 189.3(2)           | 186.4(3)           | 191.4                         | 183.8                            | 192.7                         | 184.5                            |
| C2-P2  | 189.1(2)           | 186.5(3)           | 191.4                         | 183.8                            | 192.7                         | 184.5                            |
| C1-P1  | 179.3(3)           | 181.5(3)           | 180.6                         | 183.8                            | 180.3                         | 184.5                            |
| C1-P2  | 179.2(2)           | 180.9(3)           | 180.6                         | 183.8                            | 180.3                         | 184.5                            |
| P3-C3  | 181.5(2)           | 180.1(3)           | 185.6                         | 181.8                            | 186.6                         | 182.3                            |
| P3-C4  | 182.3(2)           | 180.9(3)           | 185.6                         | 181.8                            | 186.6                         | 182.3                            |
| P5-C5  | 178.3(2)           | 178.8(3)           | 184.2                         | 184.4                            | 185.4                         | 185.1                            |
| P5-C6  | 178.6(2)           | 178.8(3)           | 184.2                         | 184.4                            | 185.4                         | 185.1                            |
| C2-C21 | 157.6(3)           | 156.2(4)           | -                             | -                                | 154.2                         | 152.3                            |
| C1-C11 | 154.0(3)           | 154.7(4)           | -                             | -                                | 151.2                         | 152.3                            |

<sup>a</sup> B3LYP/LanL2DZP

Zur weiteren Analyse der Bindungssituation wurden Wiberg-Bindungsordnungen<sup>107</sup> berechnet. Diese sind zusammen mit den entsprechenden Bindungslängen in Tabelle 28 aufgelistet. Beim Übergang von der  $C_{2v}$ -symmetrischen Übergangsstruktur **32b** zum  $C_s$ -symmetrischen Minimum **32a** verkürzt sich der P3-C2-Abstand von 260.7 auf 201.4 pm, was mit einer etwas gedehnten P-C-Einfachbindung gut vereinbar ist. Die Wiberg-Bindungsordnung erhöht sich dementsprechend von 0.25 auf 0.69. Die P3-C2-

Bindungsbildung geht mit einer Aufweitung des P5-C1-Abstandes einher (260.7 vs. 306.0 pm), wobei die Bindungsordnung von 0.25 auf 0.1 abnimmt. Die Mo1-C2-Bindung wird beim Übergang **32b**  $\square$  **32a** deutlich stärker beeinflusst als die Mo1-P3-Bindung. Der Mo1-C2-Abstand vergrößert sich um 11.1 pm von 245.8 auf 256.9 pm, wohingegen der Mo1-P3-Abstand nur um 4 pm von 258.7 auf 262.7 pm größer wird. Die Mo-C2-Bindungsordnung sinkt dabei von 0.37 auf 0.19 und die Mo-P3-Bindungsordnung weniger stark von 0.32 auf 0.27. Die P3-C2-Bindungsbildung führt zudem zu einer Lokalisierung der  $\pi$ -Wechselwirkung im P1C1P2C2-Ring, wobei die C2-P1- und C2-P2-Abstände deutlich zunehmen (192.7 vs. 184.5 pm) und die C1-P1- und C1-P2-Abstände abnehmen (180.3 vs. 184.5 pm). Entsprechend nimmt die C2-P1- und C2-P2-Bindungsordnung ab (0.86 vs. 0.98) und die C1-P1- und C1-P2-Bindungsordnung zu (1.10 vs. 0.98). Die anderen beiden Ringe bleiben dagegen von der interannularen Wechselwirkung P3-C2 im Wesentlichen unbeeinflusst, bis auf eine Vergrößerung der P3-C3- und P3-C4-Abstände von 182.3 auf 186.6 pm, wobei die Bindungsordnung von 1.01 auf 0.90 absinkt.

Diese Beobachtungen lassen sich qualitativ wie folgt interpretieren: Beim nukleophilen Angriff von P3 an C2 geht C2 in ein  $sp^3$ -hybridisiertes Zentrum über, es verliert seine Beteiligung am delokalisierten  $\pi$ -System des Rings und die Mo1-C2-Bindung wird gelöst. Trotz des Wegfalls der Mo1-C2-Bindung in **32a** bleibt die Summe der von den Liganden eingebrachten  $\pi$ -Elektronen konstant, da das 1,3-Diphosphaallyl-Teilsystem P1C1P2 als formales Anion aufzufassen ist. Die Aromatizität des C3P3C4P4-Ringes bleibt dagegen erhalten. P3 bildet somit formal ein pyramidales Phosphoniumzentrum, wobei sich durch die noch teilweise vorhandene Koordination ans Mo eine regenschirmartige Bindungsstruktur<sup>108</sup> am P3 ergibt.

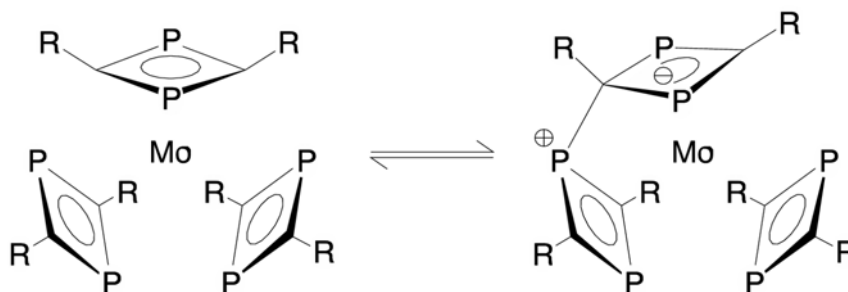

**Abbildung 20.** Schematische Darstellung der topotaktischen Bindungsbildung in **30**.



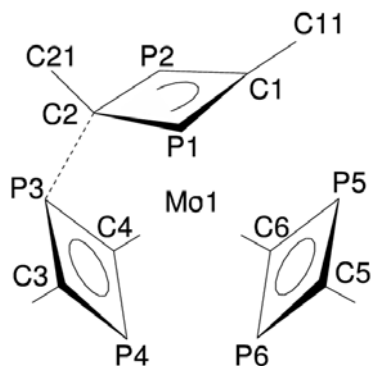

Abbildung 21. Nummerierung der Atome in 30, 31 und 32.

Tabelle 5. Berechnete Wiberg-Bindungsordnungen (BO) und Bindungslängen<sup>a</sup> (*d* in pm) von 31 und 32.

|                 | 31a (C <sub>s</sub> ) |          | 31b (C <sub>2v</sub> ) |          | 32a (C <sub>s</sub> ) |          | 32b (C <sub>2v</sub> ) |          |
|-----------------|-----------------------|----------|------------------------|----------|-----------------------|----------|------------------------|----------|
|                 | BO                    | <i>d</i> | BO                     | <i>d</i> | BO                    | <i>d</i> | BO                     | <i>d</i> |
| Mo1-C1          | 0.37                  | 240.9    | 0.42                   | 238.8    | 0.31                  | 251.0    | 0.37                   | 245.8    |
| Mo1-P1 / Mo1-P2 | 0.52                  | 254.8    | 0.51                   | 255.5    | 0.50                  | 257.2    | 0.51                   | 256.0    |
| Mo1-C2          | 0.26                  | 246.7    | 0.42                   | 238.8    | 0.19                  | 256.9    | 0.37                   | 245.8    |
| Mo1-P3          | 0.24                  | 263.2    | 0.30                   | 261.7    | 0.27                  | 262.7    | 0.32                   | 258.7    |
| Mo1-C3 / Mo1-C4 | 0.61                  | 219.4    | 0.53                   | 224.4    | 0.61                  | 219.8    | 0.52                   | 225.1    |
| Mo1-P4          | 0.28                  | 267.5    | 0.30                   | 269.1    | 0.29                  | 267.2    | 0.30                   | 268.9    |
| Mo1-P5          | 0.39                  | 258.0    | 0.30                   | 261.7    | 0.44                  | 254.6    | 0.32                   | 258.7    |
| Mo1-C5 / Mo1-C6 | 0.50                  | 226.4    | 0.53                   | 224.4    | 0.48                  | 227.3    | 0.52                   | 225.1    |
| Mo1-P6          | 0.35                  | 264.8    | 0.30                   | 269.1    | 0.35                  | 266.0    | 0.30                   | 268.9    |
| C1-P1 / C1-P2   | 1.10                  | 180.6    | 1.01                   | 183.8    | 1.10                  | 180.3    | 0.98                   | 184.5    |
| C2-P1 / C2-P2   | 0.89                  | 191.4    | 1.01                   | 183.8    | 0.86                  | 192.7    | 0.98                   | 184.5    |
| P3-C3 / P3-C4   | 0.95                  | 185.6    | 1.05                   | 181.8    | 0.90                  | 186.6    | 1.01                   | 182.3    |
| P4-C3 / P4-C4   | 1.01                  | 184.2    | 0.98                   | 184.4    | 0.97                  | 185.4    | 0.95                   | 185.1    |
| P5-C5 / P5-C6   | 1.06                  | 181.5    | 1.05                   | 181.8    | 1.03                  | 182.1    | 1.01                   | 182.3    |
| P6-C5 / P6-C6   | 1.00                  | 183.3    | 0.98                   | 184.4    | 0.97                  | 183.8    | 0.95                   | 185.1    |
| C2-P3           | 0.65                  | 206.6    | 0.24                   | 260.7    | 0.69                  | 201.4    | 0.25                   | 260.7    |
| C1-P5           | 0.13                  | 290.4    | 0.24                   | 260.7    | 0.10                  | 306.0    | 0.25                   | 260.7    |
| P4-P6           | 0.44                  | 261.8    | 0.54                   | 250.1    | 0.45                  | 263.0    | 0.54                   | 252.3    |
| C1-C11          | -                     | -        | -                      | -        | 1.07                  | 154.2    | 1.06                   | 152.3    |
| C2-C21          | -                     | -        | -                      | -        | 1.03                  | 151.2    | 1.06                   | 152.3    |

<sup>a</sup> B3LYP/LanL2DZP

Deckungsgleiche Befunde liefern die *nucleus independent chemical shifts* (NICS)<sup>61</sup> (Abbildung 80, Tabelle 29), die die cyclische Delokalisation der  $\pi$ -Ligandelektroden bzw. die Aromatizität der Liganden beschreiben. Diese wurden an den Mittelpunkten (geometrisches Mittel der vier Ringatome) der drei Ringe (NICS(0)) und an Punkten, die von diesen um 0.5, 1, 1.5 und 2 Å vom Mo weg verschoben wurden, berechnet. Die Aromatizität des 1,3-Diphosphetenylringes C1P1C2P2 sinkt danach deutlich ab, wohingegen sie für den C3P3C4P4-Ring geringfügig ansteigt.

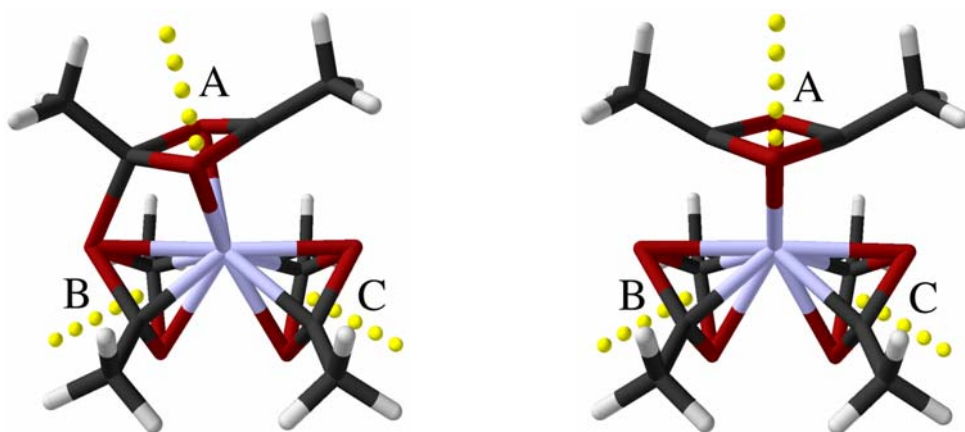

**Abbildung 22.** Berechnete Minimumstruktur **32a** (links) und Übergangsstruktur **32b** (rechts) von **32**. Die Punkte, an denen NICS-Werte berechnet wurden, sind als gelbe Kugeln dargestellt.

**Tabelle 6.** Berechnete NICS-Werte für die drei Ringe P1C1P2C2 (A), P3C3P4C4 (B) und P5C5P6C6 (C) in **32a** und **32b** (siehe Abbildung 80). Zum Vergleich sind die berechneten NICS-Werte für Benzol und 2,4-Dimethyl-1,3-diphosphet mit angegeben.

|                                 | B3LYP/    | NICS(0) | NICS(0.5) | NICS(1) | NICS(1.5) | NICS(2) |
|---------------------------------|-----------|---------|-----------|---------|-----------|---------|
| <b>32a A</b>                    | LanL2DZP  | -12.9   | -12.3     | -4.5    | 0.1       | 1.1     |
| <b>32a B</b>                    | LanL2DZP  | -22.3   | -21.1     | -10.2   | -2.8      | -0.1    |
| <b>32a C</b>                    | LanL2DZP  | -22.9   | -20.0     | -9.7    | -2.6      | -0.1    |
| <b>32b A</b>                    | LanL2DZP  | -17.5   | -16.8     | -6.8    | 0.5       | 1.2     |
| <b>32b B</b>                    | LanL2DZP  | -23.4   | -20.5     | -9.1    | -2.0      | 0.3     |
| <b>32b C</b>                    | LanL2DZP  | -23.4   | -20.5     | -9.1    | -2.0      | 0.3     |
| Benzol                          | LanL2DZP  | -8.3    | -9.9      | -10.2   | -7.7      | -5.1    |
|                                 | 6-311+G** | -8.0    | -9.8      | -10.2   | -7.6      | -4.9    |
| 2,4-Dimethyl-<br>1,3-diphosphet | LanL2DZP  | 27.7    | 24.5      | 17.0    | 9.9       | 5.5     |
|                                 | 6-311+G** | 26.9    | 23.9      | 16.3    | 9.2       | 4.8     |

Die mittels *natural population analysis* (NPA)<sup>109</sup> berechneten Atomladungen sind in Tabelle 30 angegeben. P3 ist nach der NPA in **32a** um 0.1 positiver als in **32b**, während C2 um -0.15 negativer wird. Das deutet auf einen partiellen Ladungstransfer von P3 auf C2 hin. Der Parameter folgt also der formalen Betrachtung eines nukleophilen Angriffs von P3 auf C2, wobei P3 formal in ein Phosphonium umgewandelt wird.

**Tabelle 7.** Mittels *natural population analysis* ermittelte Atomladungen in **31** und **32**.

|         | <b>31a (C<sub>s</sub>)</b> | <b>31b (C<sub>2v</sub>)</b> | <b>Δ (31a-31b)</b> | <b>32a (C<sub>s</sub>)</b> | <b>32b (C<sub>2v</sub>)</b> | <b>Δ (32a-32b)</b> |
|---------|----------------------------|-----------------------------|--------------------|----------------------------|-----------------------------|--------------------|
| Mo1     | -0.526                     | -0.558                      | 0.032              | -0.485                     | -0.554                      | 0.069              |
| C1      | -0.894                     | -0.892                      | -0.002             | -0.683                     | -0.684                      | 0.001              |
| P1 / P2 | 0.681                      | 0.684                       | -0.003             | 0.673                      | 0.681                       | -0.008             |
| C2      | -1.026                     | -0.892                      | -0.134             | -0.833                     | -0.684                      | -0.149             |
| P3      | 0.951                      | 0.874                       | 0.077              | 0.985                      | 0.887                       | 0.097              |
| C3 / C4 | -0.920                     | -0.939                      | 0.019              | -0.706                     | -0.727                      | 0.021              |
| P4      | 0.734                      | 0.736                       | -0.002             | 0.744                      | 0.758                       | -0.014             |
| P5      | 0.832                      | 0.874                       | -0.042             | 0.821                      | 0.887                       | -0.067             |
| C5 / C6 | -0.945                     | -0.939                      | -0.006             | -0.730                     | -0.727                      | -0.003             |
| P6      | 0.777                      | 0.736                       | 0.041              | 0.794                      | 0.758                       | 0.036              |

### 2.3.4 Zusammenfassung

Alle theoretisch für **32a** bestimmten Parameter harmonieren bestens mit der im Festkörper bei 100 K ermittelten Struktur. **30a** scheint demnach das thermodynamische Minimum für den Komplex **30** zu sein. Die Einflüsse der *t*-Butyl-Substituenten und des Molekülgitters sind demnach zweitrangig. Die Gitterkräfte sorgen dessen ungeachtet für die Synchronisation der intramolekularen Reaktion im Einkristall, die deshalb topotaktisch ablaufen kann. 1,3-Diphosphetliganden weisen also neben ihren *a priori* nukleophilen auch elektrophile Eigenschaften auf - sie sind ambiphil. Beim nukleophilen Angriff von P3 an C2 geht C2 dabei in ein sp<sup>3</sup>-hybridisiertes Zentrum über, es verliert seine Beteiligung am delokalisierten π-System des Rings. Die Mo1-C2-Bindung wird gelöst und es wird formal ein 1,3-Diphosphaallyl-Anion P1C1P2 gebildet. Die Aromatizität des C3P3C4P4-Ringes bleibt dagegen erhalten. P3 bildet somit formal ein pyramidales Phosphoniumzentrum.

## 2.4 Eisenkomplexe mit phosphororganischen $\pi$ -Liganden

### 2.4.1 Einleitung

Bei der Reaktion von  $(\eta^6\text{-Toluol})(\eta^4\text{-1-methylnaphthalin})\text{eisen}$  mit *tert*-Butylphosphaacetylen im Molverhältnis 1:2 bis 1:5 bei 0 bis 20°C entstehen neben dem Cyclodimer von *tert*-Butylphosphaacetylen, das in **36** (orange) als Ligand gebunden ist, die Komplexe **37** (oliv), **38** (grün) und **39** (grün) mit 1,3-Diphospholyl und 1,2,4-Triphospholyl-Liganden, für deren Bildung P-C-Dreifachbindungen in *tert*-Butylphosphaacetylen gebrochen werden müssen (Abbildung 81).<sup>110,111</sup> Für den Aufbau der Verbindung **38** sind dabei fünf Moleküle Phosphaalkin notwendig, die von einem Molekül **35** zu den beiden fünfgliedrigen Ringen umgesetzt werden. Bei den Verbindungen **37** und **39** ist dagegen das Verhältnis der beiden Bausteine des Phosphaalkins ungleich eins, so dass man davon ausgehen muss, dass ein Austausch von Gruppen zwischen den Vorstufen der isolierten Komplexe stattfindet. Die Verbindungen **38** und **39** sind dabei auch auf anderem Wege zugänglich, wie J. F. Nixon *et al.* gezeigt haben.<sup>112</sup> Die Arbeitsgruppen von F. G. A. Cloke und J. F. Nixon konnten später zeigen, dass ein Austausch von P-Atomen und/oder CR-Fragmenten eine häufige Reaktion beim Aufbau koordinierter P-Heterocyclen durch Reaktion von Metalldämpfen mit *tert*-Butylphosphaacetylen ist,<sup>113</sup> wobei jedoch stets nur geringe Ausbeuten an Sandwichkomplexen entstehen. P. Binger und G. Glaser haben den Komplex **38** bei der Umsetzung von Bis(cyclooctatetraen)eisen mit Phosphaalkinen in mehr als 50% Ausbeute erhalten und diesen Reaktionstyp somit aus der Situation einer Nebenreaktion herausgeführt.<sup>114</sup>

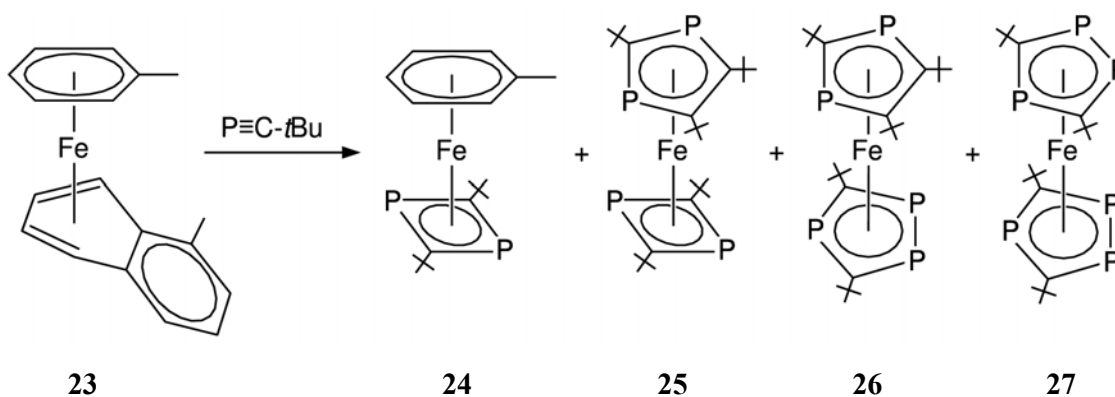

Abbildung 23. Reaktion von  $(\eta^6\text{-Toluol})(\eta^4\text{-1-methylnaphthalin})\text{eisen}$  mit *tert*-Butylphosphaacetylen.

Verwendet man bei der Reaktion von **35** mit *tert*-Butylphosphaacetylen sehr hohe Überschüsse an Phosphaalkin, entstehen neben **36** bis **39** noch mindestens zehn weitere eisenhaltige Verbindungen, von denen die Komplexe **40** (dunkelbraun, paramagnetisch), **41** (olivbraun, paramagnetisch) und **42** (rot, diamagnetisch) in kleinen Mengen isoliert wurden (Abbildung 82).<sup>115,110</sup> **40** und **41** sind thermisch stabile 16 Valenz-Elektronen- (VE) -Komplexe, die sich darin deutlich von anderen 16 VE-Komplexen des Eisens unterscheiden. In der Verbindung **41** bildet ein polycyclisches Heptamer von *tert*-Butylphosphaacetylen den Liganden. Dabei ist ein als 1,3-Diphosphaallyl gebundener 1,3-Diphosphetring über eine C-P-Sigmabindung mit einem (PC-*t*Bu)<sub>5</sub>-Käfig verknüpft. Diese Bindungssituation entspricht also der für den Ring P1C1P2C2 von **32a** (Abbildung 79, Seite 100). Das Eisen bindet den Käfigteil einerseits als 2-Phosphaallyl, andererseits durch Koordination mit dem freien Elektronenpaar an einem Phosphor (Abbildung 82).

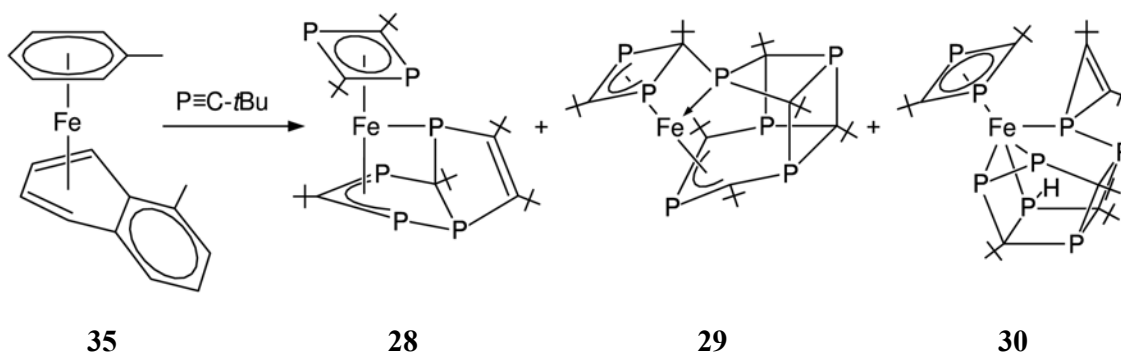

**Abbildung 24.** Reaktion von (Toluol)(1-methylnaphthalin)eisen mit *tert*-Butylphosphaacetylen im Überschuss.

Aus der Literatur ist bekannt, dass es eine starke Präferenz zur Bildung von koordinierten Cyclodimeren und Cyclotrimeren bei der Reaktion von reaktiven Metallkomplexen mit Phosphaalkinen und Alkinen gibt. So bilden sich z. B. bei der Reaktion von (Toluol)bis(ethen)eisen mit einem Gemisch aus *tert*-Butylphosphaacetylen und terminalen Alkinen oder Acetylen (1,3-Diphosphinin)(1,3-diphosphet)eisen-Derivate in guter Ausbeute.<sup>116</sup> Da andere Metalle mit *tert*-Butylphosphaacetylen durchaus das Cyclotrimer 2,4,6-Tri-*tert*-Butyl-1,3,5-triphosphinin bilden,<sup>117</sup> (2,4,6-Tri-*tert*-butyl-1,3,5-triphosphinin)-(1,5-cyclooctadien)eisen dagegen eine thermolabile Substanz ist, erscheint es als wahrscheinlich, dass der Cyclotrimer-Cyclodimer-Komplex **43** zwar gebildet wird, aber anschließend entweder zum Pentaphosphaferrocen **38** umgelagert wird, oder, bei Überschuss

an Phosphaalkin, zur polycyclischen Käfigverbindung **41** weiterreagiert (Abbildung 83). Diese beiden Reaktionswege sollen im Folgenden mittels DFT näher untersucht werden.

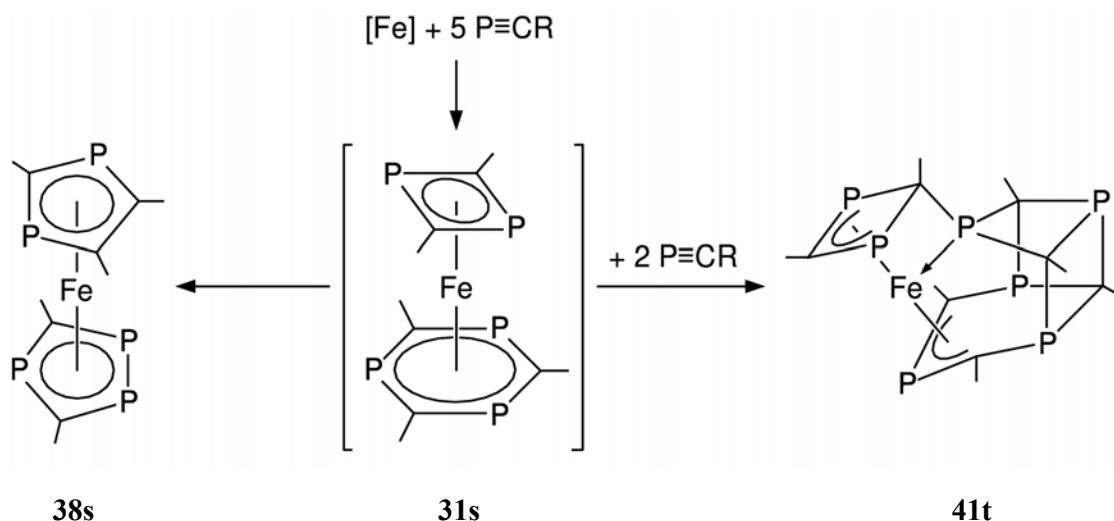

**Abbildung 25.** Schematische Darstellung der Bildung von Pentaphosphaferrocen **38s** und, bei Überschuss an Phosphaalkin, der polycyclischen Käfigverbindung **41t** über die vermutete Zwischenstufe **31s**.

## 2.4.2 Rechenmethoden

Alle Geometrien wurden mit dem in Gaussian98<sup>88</sup> implementierten B3LYP<sup>24,22</sup> drei Parameter Hybrid-Dichtefunktional optimiert und mit Frequenzrechnungen als lokale Minima oder Übergangsstrukturen charakterisiert. Da bei den Reaktionen möglicherweise Singulett-Triplett-Übergänge stattfinden, wurden sowohl die Singulett- als auch die Triplett-Zustände berechnet. Für die Triplett-Zustände wurde dabei der *unrestricted* Formalismus verwendet. Da B3LYP die Energieunterschiede zwischen den Singulett- und Triplett-Zuständen der Übergangsmetallkomplexe nur unzureichend wiedergibt, wurden die Strukturen außerdem mit dem B3LYP\*-Funktional von Reiher, Salomon und Hess<sup>25</sup> reoptimiert. Da sich die mit B3LYP\* berechneten Geometrien häufig nur geringfügig von den mit B3LYP berechneten unterscheiden, wurde in den meisten Fällen auf eine erneute Frequenzanalyse verzichtet. Als Basissatz wurde der Schäfer-Horn-Ahlich's *split valence* Basissatz<sup>99</sup> (SHAsv) verwendet. Dieser wurde um jeweils einen Satz *d*-Funktionen mit Exponenten von 0.6 und 0.34 auf C und P und *p*- und *f*-Funktionen mit Exponenten von 0.098 und 1.05 auf Fe erweitert (SHAsvp).<sup>100</sup>

### 2.4.3 Ergebnisse

Zunächst soll, ausgehend vom vermuteten Primärprodukt **43**, die Bildung der polycyclischen Käfigverbindung **41** untersucht werden. Bei dieser Reaktion werden zwei Moleküle Phosphaalkin addiert und insgesamt sechs P-C-Bindungen gebildet: drei beim Aufbau des (PC-*t*Bu)<sub>5</sub>-Käfigs zwischen dem 1,3-Diphosphet- und dem 1,3,5-Triphosphininring und zwei bei der Bildung des neuen Diphosphetringes und schließlich die P-C-Bindung zwischen diesem Diphosphetring und dem (PC-*t*Bu)<sub>5</sub>-Käfig. Als Ansatzpunkt für den vermuteten Reaktionsweg wurde der intramolekulare Angriff eines Phosphoratoms des 1,3-Diphosphetringes an ein Kohlenstoffatom des benachbarten 1,3,5-Triphosphininringes untersucht. Ein derartiges Reaktionsmuster wurde bereits für den Molybdänkomplex **30** gefunden (Abbildung 78, Seite 99). Die mit B3LYP/SHAsvp berechneten Singulett- und Triplett-Strukturen des vermuteten ersten Reaktionsschrittes sind in Abbildung 84 dargestellt. In Tabelle 31 und 32 sind die mit B3LYP/SHAsvp bzw. mit B3LYP\*/SHAsvp berechneten interatomaren Abstände angegeben. Die absoluten und relativen Energien aller untersuchten Verbindungen sind in Tabelle 40 aufgelistet und in Abbildung 94 und 95 graphisch aufgetragen. Im Folgenden werden, soweit nicht anders angegeben, die mit B3LYP/SHAsvp berechneten Ergebnisse beschrieben.

Im Gegensatz zum Singulett-Zustand des Eduktes, für den nur eine einzige Struktur **43s** gefunden wurde, wurden für den Triplett-Zustand insgesamt drei Strukturen gefunden. Dabei ist die Triplett-Struktur **43t** mit einer relativen Energie zu **43s** von 23.2 kcal·mol<sup>-1</sup> der Singulett-Struktur **43s** am ähnlichsten. Sie unterscheidet sich hauptsächlich durch eine wesentlich größere Fe-P5-Bindungslänge von 2.673 Å zwischen Eisen und einem Phosphoratom des 1,3-Diphosphetringes von **43s** (2.345 Å). Die beiden anderen Triplett-Strukturen, **44t** und **45t**, besitzen eine relative Energie von 10.7 bzw. 14.9 kcal·mol<sup>-1</sup>. Bei ihnen ist der Triphosphininring im Gegensatz zu **43t**  $\eta^4$ -gebunden, so dass sich hier deutlich größere Fe-C1-, 3.344 Å in **44t** und 3.110 Å in **45t**, und Fe-P3-Abstände, 3.375 Å in **44t** und 3.267 Å in **45t**, ergeben als in **43s**, mit 2.156 bzw. 2.399 Å. Die Struktur **44t** zeichnet sich zudem durch einen kurzen P2-P5-Abstand von 2.547 Å aus. Die P-C-Abstände innerhalb des Triphosphininringes, die in **43s** mit Werten zwischen 1.763 und 1.767 Å sehr ähnlich sind, weisen in **43t** mit Werten zwischen 1.763 und 1.782 Å eine etwas größere Alternanz auf. Noch größer sind die Unterschiede in **45t**, mit P-C-Bindungslängen zwischen 1.692 Å für die formale P3-C1-Doppelbindung und 1.829 bzw. 1.839 Å für die beiden formalen Einfachbindungen P1-C1 und P3-C3. Eine deutliche Alternanz, mit Bindungslängen von

1.834 und 1.840 Å für P4-C4 und P5-C5 bzw. 1.802 und 1.780 Å für P4-C5 und P5-C4, weisen hier auch die P-C-Bindungslängen des Diphosphetringes auf. Für **44t** und **45t** wurden keine entsprechenden Singulett-Strukturen gefunden, stattdessen führten die Optimierungen zu **43s**.

Als Produkt der intramolekularen P-C-Bindungsbildung, die den vermuteten ersten Reaktionsschritt darstellt, ergeben sich anders als erwartet keine  $\eta^4\eta^5$ -gebundenen, sondern  $\eta^4\eta^3$ -gebundene Strukturen. Hierbei ist das Eisen, analog zum Mo in **32a** (Abbildung 79, Seite 100),  $\eta^4$  an den 1,3-Diphosphetring gebunden, in dem eines der Phosphoratome eine positive Formalladung besitzt. Der 1,3,5-Triphosphininring ist dagegen als 1,3-Diphosphaallyl  $\eta^3$  an das Eisen gebunden. Das Eisen besitzt somit in beiden Strukturen formal 16VE. Daher überrascht es nicht, dass **47t** mit 13.9 kcal·mol<sup>-1</sup> eine wesentlich niedrigere relative Energie besitzt als **47s** mit 39.5 kcal·mol<sup>-1</sup>. **47t** ist dabei über die Übergangsstruktur **46t**<sup>#</sup> ( $E_{\text{rel}} = 19.0$  kcal·mol<sup>-1</sup>) mit **45t** verknüpft, wohingegen **47s** über **46s**<sup>#</sup> ( $E_{\text{rel}} = 44.5$  kcal·mol<sup>-1</sup>) mit **43s** verknüpft ist. Bei der Reaktion von **45t** über **46t**<sup>#</sup> zu **47t** verringert sich der P3-C4-Abstand von 3.191 über 2.422 auf 1.975 Å. Der Fe-C3-Abstand steigt dabei von 2.106 über 2.306 auf 2.696 Å deutlich stärker an als der Fe-P4-Abstand (2.357 □ 2.398 □ 2.502 Å). Die P2-C3- und P3-C3-Bindungen werden von 1.819 bzw. 1.838 Å in **45t** auf 1.914 bzw. 1.878 Å in **47t** deutlich länger. Die P4-C4- und P4-C5-Bindungen des ursprünglichen Diphosphetringes werden mit 1.866 und 1.869 Å in **47t** ebenfalls etwas länger, wenn auch nicht in demselben Umfang.

Ein sehr ähnliches Bild liefern die mit B3LYP\*/SHAsvp erhaltenen Ergebnisse, wobei im Vergleich zu den B3LYP/SHAsvp-Ergebnissen die Triplett-Zustände gegenüber den Singulett-Zuständen systematisch um einige kcal·mol<sup>-1</sup> destabilisiert sind. Die mit B3LYP\*/SHAsvp berechneten relativen Energien der Triplett-Übergangsstruktur **46t**<sup>#</sup> und der resultierenden Triplett-Zwischenstufe **47t** sind mit 23.3 und 18.8 kcal·mol<sup>-1</sup> ebenfalls wesentlich niedriger als die der entsprechenden Singulett-Strukturen **46s**<sup>#</sup> und **47s** mit 44.9 und 41.3 kcal·mol<sup>-1</sup>. Sowohl die B3LYP- als auch die B3LYP\*-Ergebnisse deuten also darauf hin, dass im ersten Reaktionsschritt, wie in Abbildung 85 gezeigt, über die Triplett-Zwischenstufe **45t** und die Übergangsstruktur **46t**<sup>#</sup> die Zwischenstufe **47t** gebildet wird.



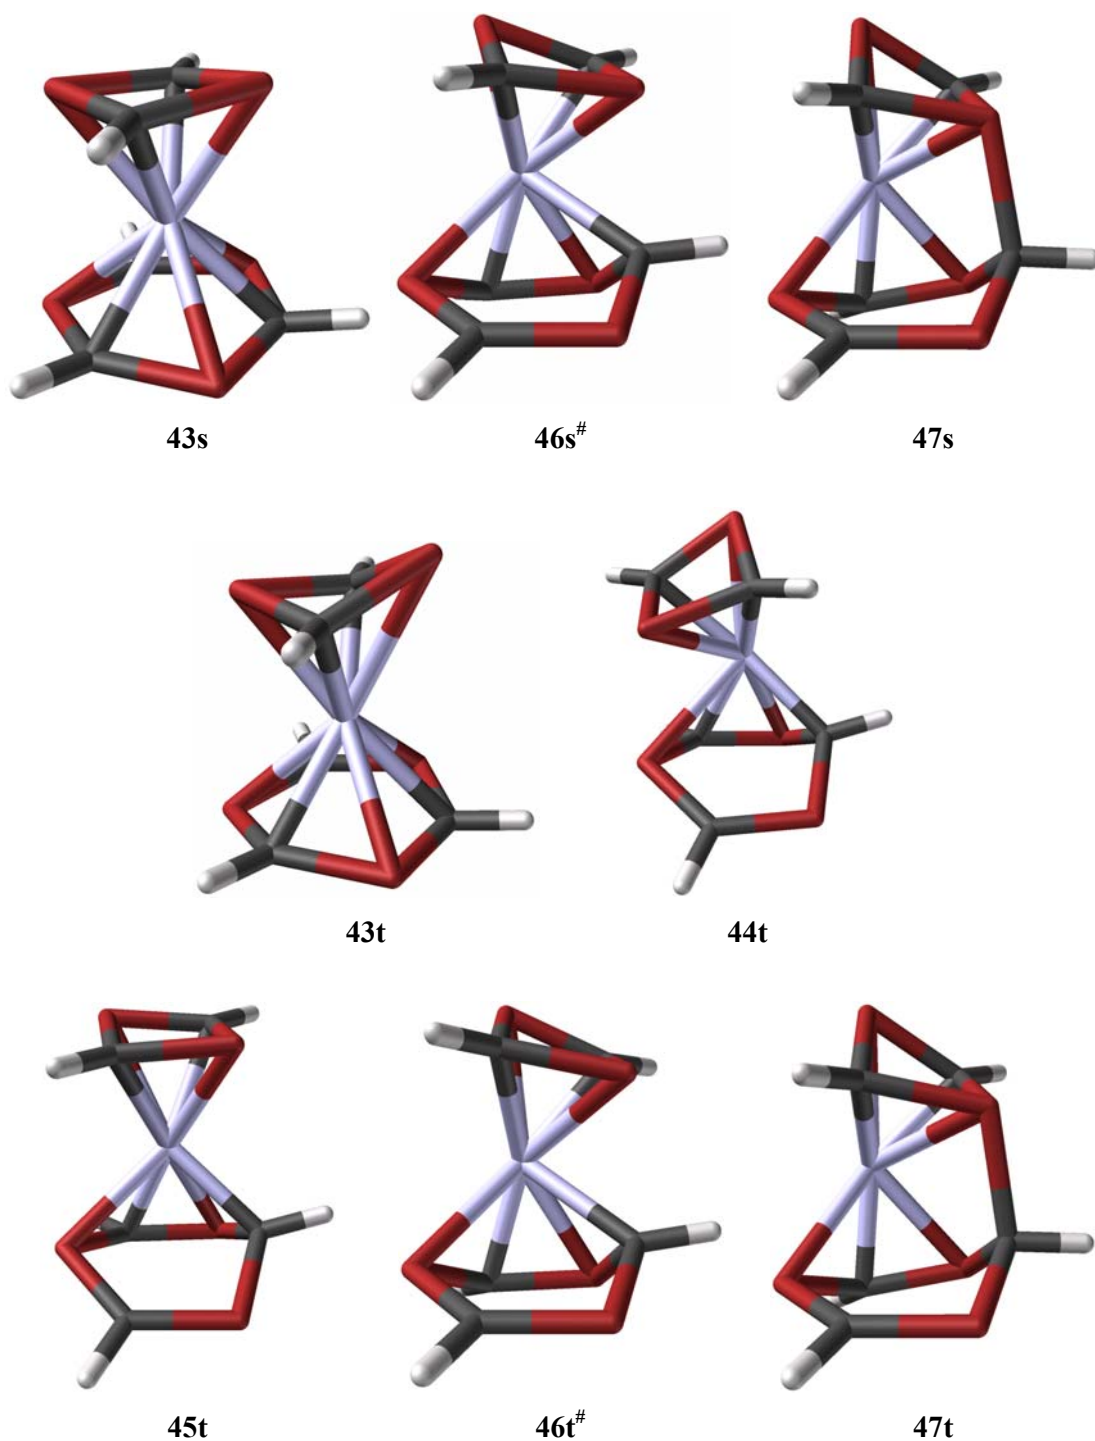

**Abbildung 26.** Berechnete Singulett- und Triplet-Strukturen des Eduktes, **43s** und **43t**, und der möglichen Zwischenstufe, **47s** und **47t**. Neben **43t** wurden noch weitere Triplet-Strukturen, **44t** und **45t**, gefunden. Die Zwischenstufen **47s** und **47t** sind dabei über die Übergangszustände **46s<sup>#</sup>** und **46t<sup>#</sup>** mit **43s** bzw. **45t** verknüpft.

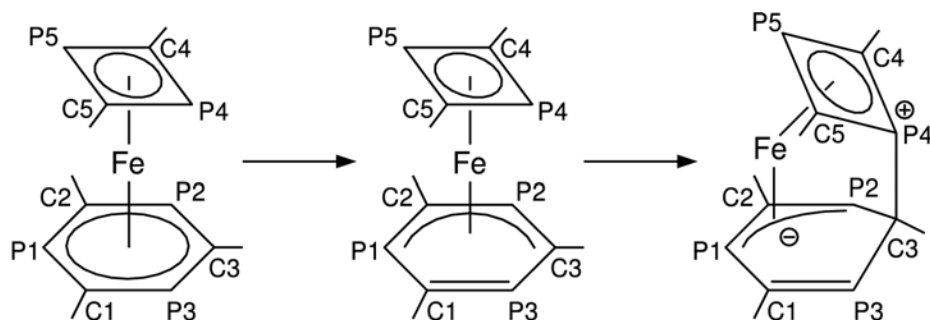

**Abbildung 27.** Schematische Darstellung der vermuteten ersten Reaktionsschritte. Ausgehend vom Edukt **43s** wird die Triplet-Zwischenstufe **45t** und nach anschließender P-C-Bindungsbildung **47t** gebildet.

**Tabelle 8.** Mit B3LYP/SHAsvp berechnete interatomare Abstände [ $\text{\AA}$ ].

|       | <b>43s</b> | <b>43t</b> | <b>32t</b> | <b>33t</b> | <b>34s<sup>#</sup></b> | <b>46t<sup>#</sup></b> | <b>35s</b> | <b>47t</b> |
|-------|------------|------------|------------|------------|------------------------|------------------------|------------|------------|
| Fe-C1 | 2.156      | 2.189      | 3.344      | 3.110      | 3.171                  | 3.231                  | 3.291      | 3.321      |
| Fe-P1 | 2.428      | 2.414      | 2.673      | 2.442      | 2.443                  | 2.439                  | 2.456      | 2.433      |
| Fe-C2 | 2.156      | 2.255      | 2.081      | 2.107      | 2.015                  | 2.074                  | 2.013      | 2.062      |
| Fe-P2 | 2.399      | 2.414      | 2.294      | 2.341      | 2.299                  | 2.344                  | 2.352      | 2.411      |
| Fe-C3 | 2.181      | 2.189      | 2.083      | 2.106      | 2.307                  | 2.306                  | 2.696      | 2.696      |
| Fe-P3 | 2.399      | 2.578      | 3.375      | 3.267      | 3.457                  | 3.509                  | 3.748      | 3.789      |
| Fe-C4 | 2.089      | 2.052      | 2.110      | 2.176      | 2.032                  | 2.117                  | 2.010      | 2.051      |
| Fe-P4 | 2.306      | 2.353      | 2.382      | 2.357      | 2.369                  | 2.398                  | 2.399      | 2.502      |
| Fe-C5 | 2.089      | 2.053      | 2.037      | 2.118      | 2.033                  | 2.054                  | 1.940      | 2.000      |
| Fe-P5 | 2.345      | 2.673      | 2.444      | 2.395      | 2.276                  | 2.368                  | 2.349      | 2.394      |
| C1-P1 | 1.765      | 1.782      | 1.828      | 1.828      | 1.825                  | 1.831                  | 1.832      | 1.832      |
| P1-C2 | 1.765      | 1.764      | 1.835      | 1.799      | 1.783                  | 1.798                  | 1.781      | 1.793      |
| C2-P2 | 1.767      | 1.764      | 1.778      | 1.782      | 1.790                  | 1.782                  | 1.775      | 1.768      |
| P2-C3 | 1.763      | 1.782      | 1.821      | 1.819      | 1.845                  | 1.858                  | 1.895      | 1.914      |
| C3-P3 | 1.763      | 1.763      | 1.833      | 1.838      | 1.846                  | 1.850                  | 1.876      | 1.878      |
| P3-C1 | 1.767      | 1.763      | 1.687      | 1.692      | 1.698                  | 1.688                  | 1.695      | 1.690      |
| C4-P4 | 1.805      | 1.830      | 1.783      | 1.834      | 1.820                  | 1.844                  | 1.848      | 1.866      |
| P4-C5 | 1.805      | 1.830      | 1.823      | 1.802      | 1.814                  | 1.817                  | 1.869      | 1.869      |
| C5-P5 | 1.806      | 1.839      | 1.838      | 1.840      | 1.803                  | 1.831                  | 1.811      | 1.817      |
| P5-C4 | 1.806      | 1.839      | 1.849      | 1.780      | 1.814                  | 1.783                  | 1.806      | 1.793      |
| P4-C3 | 3.432      | 3.666      | 4.104      | 3.191      | 2.332                  | 2.422                  | 1.973      | 1.975      |
| P2-P5 | 3.337      | 4.230      | 2.547      | 3.939      | 4.021                  | 4.327                  | 4.324      | 4.423      |

*Tabelle 9. Mit B3LYP\*/SHAsvp berechnete interatomare Abstände [ $\text{\AA}$ ].*

|       | <b>43s</b> | <b>43t</b> | <b>44t</b> | <b>45t</b> | <b>46s<sup>#</sup></b> | <b>46t<sup>#</sup></b> | <b>47s</b> | <b>47t</b> |
|-------|------------|------------|------------|------------|------------------------|------------------------|------------|------------|
| Fe-C1 | 2.151      | 2.181      | 3.340      | 3.090      | 3.166                  | 3.231                  | 3.281      | 3.325      |
| Fe-P1 | 2.433      | 2.402      | 2.658      | 2.427      | 2.431                  | 2.428                  | 2.451      | 2.424      |
| Fe-C2 | 2.151      | 2.240      | 2.071      | 2.092      | 2.002                  | 2.063                  | 2.002      | 2.052      |
| Fe-P2 | 2.398      | 2.402      | 2.286      | 2.332      | 2.297                  | 2.336                  | 2.343      | 2.400      |
| Fe-C3 | 2.180      | 2.181      | 2.074      | 2.091      | 2.342                  | 2.304                  | 2.693      | 2.695      |
| Fe-P3 | 2.398      | 2.586      | 3.376      | 3.249      | 3.473                  | 3.514                  | 3.740      | 3.793      |
| Fe-C4 | 2.086      | 2.045      | 2.113      | 2.158      | 2.022                  | 2.105                  | 2.005      | 2.041      |
| Fe-P4 | 2.306      | 2.344      | 2.371      | 2.353      | 2.365                  | 2.396                  | 2.385      | 2.497      |
| Fe-C5 | 2.086      | 2.045      | 2.034      | 2.112      | 2.014                  | 2.047                  | 1.932      | 1.993      |
| Fe-P5 | 2.347      | 2.673      | 2.438      | 2.381      | 2.278                  | 2.359                  | 2.344      | 2.383      |
| C1-P1 | 1.767      | 1.785      | 1.829      | 1.828      | 1.826                  | 1.832                  | 1.832      | 1.833      |
| P1-C2 | 1.767      | 1.766      | 1.834      | 1.804      | 1.789                  | 1.802                  | 1.785      | 1.796      |
| C2-P2 | 1.771      | 1.766      | 1.783      | 1.785      | 1.792                  | 1.785                  | 1.781      | 1.772      |
| P2-C3 | 1.766      | 1.785      | 1.827      | 1.823      | 1.853                  | 1.864                  | 1.895      | 1.915      |
| C3-P3 | 1.766      | 1.765      | 1.835      | 1.838      | 1.849                  | 1.851                  | 1.876      | 1.878      |
| P3-C1 | 1.771      | 1.765      | 1.690      | 1.696      | 1.702                  | 1.691                  | 1.699      | 1.693      |
| C4-P4 | 1.810      | 1.834      | 1.787      | 1.832      | 1.823                  | 1.845                  | 1.846      | 1.867      |
| P4-C5 | 1.810      | 1.834      | 1.828      | 1.806      | 1.820                  | 1.820                  | 1.870      | 1.868      |
| C5-P5 | 1.808      | 1.841      | 1.837      | 1.839      | 1.809                  | 1.835                  | 1.816      | 1.821      |
| P5-C4 | 1.808      | 1.841      | 1.849      | 1.787      | 1.819                  | 1.787                  | 1.811      | 1.799      |
| P4-C3 | 3.424      | 3.646      | 4.072      | 3.144      | 2.282                  | 2.401                  | 1.980      | 1.978      |
| P2-P5 | 3.340      | 4.209      | 2.563      | 3.896      | 4.017                  | 4.296                  | 4.300      | 4.390      |

Als nächster Reaktionsschritt kommt entweder die Bildung einer weiteren P-C-Bindung zwischen den Ringen, wobei sich die Koordination des Eisens weiter verringern würde, oder die Addition eines Phosphaalkinmoleküls an **47t** in Betracht. Letzteres scheint der wahrscheinlichere Reaktionsweg für die Triplett-Zwischenstufe **47t** zu sein. Die dadurch gebildete Zwischenstufe **48** sollte 18VE besitzen und somit als Singulett vorliegen.

Aus den Rechnungen ergibt sich jedoch, dass die Triplett-Struktur **48t** (Abbildung 86) eine niedrigere relative Energie besitzt als die Singulett-Struktur **48s** (Abbildung 87). So ist **48t** nach den B3LYP-Rechnungen um  $5.3 \text{ kcal}\cdot\text{mol}^{-1}$  (B3LYP\*  $1.7 \text{ kcal}\cdot\text{mol}^{-1}$ ) stabiler als **48s**. Eine Erklärung hierfür bietet der Fe-P4-Abstand, der in **48s** mit  $2.478 \text{ \AA}$  wesentlich kürzer ist

als in **48t** mit 2.829 Å. Der P4-C4-P5-C5-Ring ist demnach in **48s** wie in **47t** (Abbildung 85)  $\eta^4$ -koordiniert, während er in **48t** als 2-Phosphaallyl  $\eta^3$ -koordiniert ist (Abbildung 88). **48s** ist somit als 18VE-Komplex und **48t** als 16VE-Komplex aufzufassen.

Der Übergang von der  $\eta^4$ - zur  $\eta^3$ -Koordination bedeutet einen Schritt in Richtung des Produktes, in dem der P4-C4-P5-C5-Ring nur noch  $\eta^1$  an P5 koordiniert ist. Der nächste Schritt könnte nun die Bildung einer Bindung zwischen C4 und P2 sein, wodurch sich die Koordination am Vierring weiter auf  $\eta^2$  erniedrigen würde. Aus den Rechnungen ergibt sich eine Aktivierungsbarriere für diese Reaktion, **48t**  $\square$  **50t<sup>#</sup>**  $\square$  **51t** (Abbildung 86), von 5.8 kcal·mol<sup>-1</sup> (B3LYP\* 6.6 kcal·mol<sup>-1</sup>). Der P2-C4-Abstand sinkt dabei von 3.127 über 2.340 auf 1.916 Å, der Fe-P2-Abstand steigt dagegen von 2.671 über 2.735 auf 3.326 Å und der Fe-C4-Abstand von 2.172 über 2.446 auf 3.288 Å an. Die P1-C2-Bindung wird von 1.799 auf 1.777 Å und die P5-C5-Bindung von 1.818 auf 1.784 Å etwas kürzer, während die P2-C2-Bindungslänge von 1.739 auf 1.842 Å und die P5-C4-Bindung von 1.789 auf 1.902 Å deutlich länger werden. Die Fe-C1- und Fe-P3-Abstände verkürzen sich von 3.555 auf 3.019 Å bzw. von 4.185 auf 3.771 Å. In der sich anschließenden Umlagerung von **51t** über **52t<sup>#</sup>** zu **53t** (Abbildung 86) sinken die Fe-C1- und Fe-P3-Abstände weiter auf 2.258 bzw. 2.598 Å. Der C1-P3-Abstand steigt dabei von 1.693 auf 1.744 Å an, während der P1-C1-Abstand von 1.829 auf 1.801 Å etwas kürzer wird. Die berechnete Aktivierungsenergie für diese Umlagerung ist mit 0.1 kcal·mol<sup>-1</sup> verschwindend gering.

Zu den weiter oben beschriebenen Strukturen **48t** und **53t** existieren noch weitere Konformationsisomere, die sich durch Rotation des  $\pi$ -gebundenen Phosphaalkins ergeben. So ist **49t** ein Konformationsisomer von **48t**, das mit einer relativen Energie von 5.5 kcal·mol<sup>-1</sup> (B3LYP\* 7.8) um 1.8 kcal·mol<sup>-1</sup> (B3LYP\* 2.0) weniger stabil ist als **48t**. Dagegen sind **54t** und **55t**, die beiden untersuchten Konformationsisomere von **53t**, mit relativen Energien von -11.4 kcal·mol<sup>-1</sup> (B3LYP\* -8.2) und -12.1 kcal·mol<sup>-1</sup> (B3LYP\* -9.0) um 1.8 kcal·mol<sup>-1</sup> (B3LYP\* 1.5) bzw. 2.5 kcal·mol<sup>-1</sup> (B3LYP\* 2.3) stabiler als **53t**.

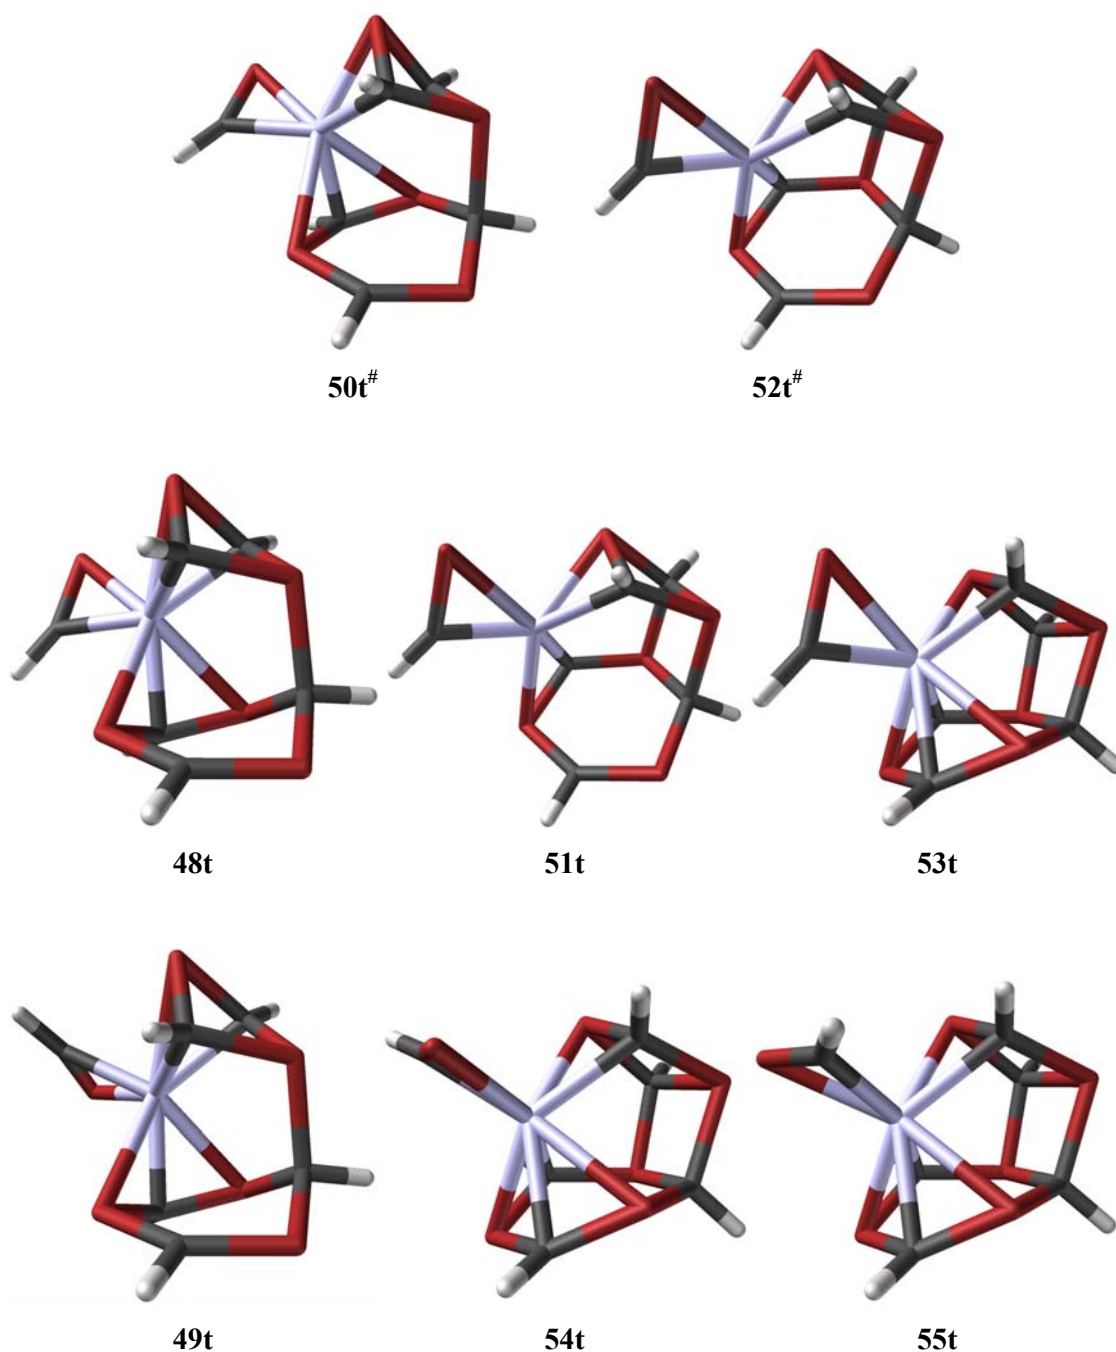

**Abbildung 28.** Berechnete Triplett-Strukturen der möglichen Zwischenstufen **48t**, **51t** und **53t** und der Übergangsstrukturen **50t<sup>#</sup>** und **52t<sup>#</sup>**. Neben diesen Strukturen existieren noch weitere Konformationen, wie z. B. **49t**, ein Konformationsisomer der Struktur **48t**, sowie **54t** und **55t**, die beide Konformationsisomere der Struktur **53t** sind.

Die mit B3LYP/SHAsvp berechneten Singulett-Strukturen der betrachteten Reaktionen sind in Abbildung 87 dargestellt. Es wurde dabei kein zu **51t** analoges Singulett-Minimum gefunden. Die berechneten relativen Energien der Übergangsstruktur **52s<sup>#</sup>** und der Zwischenstufe **53s** sind wesentlich größer als die der entsprechenden Triplett-Strukturen. So besitzt **52s<sup>#</sup>** eine relative Energie zu **43s** von  $33.5 \text{ kcal}\cdot\text{mol}^{-1}$  (B3LYP) bzw.  $31.7 \text{ kcal}\cdot\text{mol}^{-1}$  (B3LYP\*) und **53s** von  $1.6 \text{ kcal}\cdot\text{mol}^{-1}$  (B3LYP) bzw.  $0.3 \text{ kcal}\cdot\text{mol}^{-1}$  (B3LYP\*). Die Aktivierungsenergie der Reaktion **48s**  $\square$  **52s<sup>#</sup>**  $\square$  **53s** beträgt  $24.5 \text{ kcal}\cdot\text{mol}^{-1}$  (B3LYP) bzw.  $24.2 \text{ kcal}\cdot\text{mol}^{-1}$  (B3LYP\*). Anhand dieser Rechnungen kann somit als ausgeschlossen gelten, dass die Reaktion über die Singulett-Übergangsstruktur **52s<sup>#</sup>** verläuft.

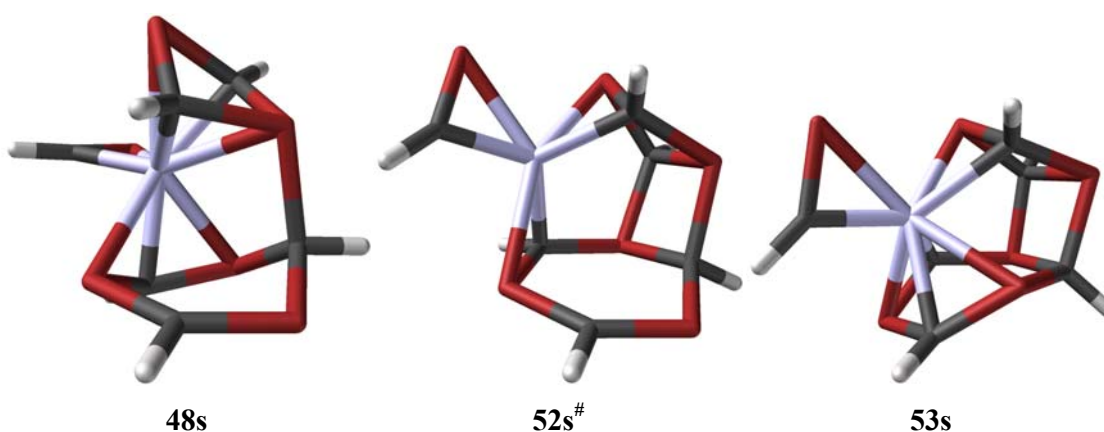

**Abbildung 29.** Berechnete Singulett-Strukturen der möglichen Zwischenstufen **48s** und **53s** und der Übergangsstruktur **52s<sup>#</sup>**.

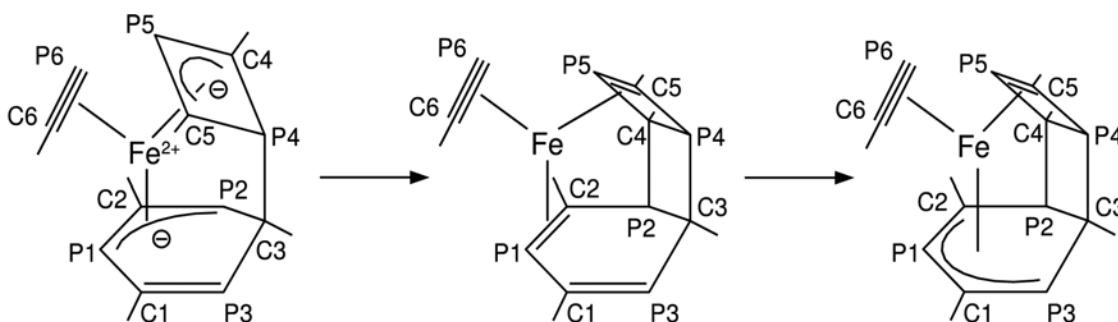

**Abbildung 30.** Schematische Darstellung der vermuteten Reaktionsschritte. Nach Addition eines Phosphaalkins an **47t** unter Bildung von **48t** (links) wird erneut eine P-C-Bindung gebildet. Die so gebildete Zwischenstufe **51t** (Mitte) lagert sich anschließend zu **53t** (rechts) um.

**Tabelle 10.** Mit B3LYP/SHAsvp berechnete interatomare Abstände [ $\text{\AA}$ ].

|       | <b>36s</b> | <b>48t</b> | <b>37t</b> | <b>38t<sup>#</sup></b> | <b>39t</b> | <b>40s<sup>#</sup></b> | <b>52t<sup>#</sup></b> | <b>41s</b> | <b>53t</b> | <b>42t</b> | <b>43t</b> |
|-------|------------|------------|------------|------------------------|------------|------------------------|------------------------|------------|------------|------------|------------|
| Fe-C1 | 3.385      | 3.555      | 3.533      | 3.526                  | 3.019      | 3.355                  | 2.740                  | 2.186      | 2.258      | 2.225      | 2.215      |
| Fe-P1 | 2.457      | 2.509      | 2.553      | 2.460                  | 2.421      | 2.399                  | 2.401                  | 2.345      | 2.425      | 2.401      | 2.412      |
| Fe-C2 | 2.087      | 2.162      | 2.149      | 2.050                  | 2.080      | 1.948                  | 2.106                  | 2.071      | 2.214      | 2.195      | 2.204      |
| Fe-P2 | 2.396      | 2.671      | 2.534      | 2.735                  | 3.326      | 3.000                  | 3.301                  | 3.291      | 3.257      | 3.259      | 3.252      |
| Fe-C3 | 2.749      | 3.125      | 3.038      | 3.455                  | 3.568      | 3.523                  | 3.431                  | 3.208      | 3.151      | 3.141      | 3.100      |
| Fe-P3 | 3.859      | 4.158      | 4.089      | 4.259                  | 3.771      | 4.116                  | 3.413                  | 2.407      | 2.598      | 2.527      | 2.500      |
| Fe-C4 | 2.034      | 2.172      | 2.150      | 2.446                  | 3.288      | 2.975                  | 3.287                  | 3.362      | 3.305      | 3.315      | 3.312      |
| Fe-P4 | 2.478      | 2.829      | 2.790      | 3.200                  | 3.505      | 3.329                  | 3.501                  | 3.599      | 3.504      | 3.523      | 3.479      |
| Fe-C5 | 2.033      | 2.104      | 2.141      | 2.169                  | 2.163      | 2.010                  | 2.189                  | 2.271      | 2.236      | 2.265      | 2.236      |
| Fe-P5 | 2.397      | 2.384      | 2.418      | 2.311                  | 2.397      | 2.362                  | 2.390                  | 2.422      | 2.421      | 2.430      | 2.436      |
| Fe-C6 | 1.995      | 2.045      | 2.065      | 2.029                  | 1.989      | 1.880                  | 2.002                  | 1.896      | 2.020      | 1.999      | 2.000      |
| Fe-P6 | 2.451      | 2.462      | 2.443      | 2.442                  | 2.384      | 2.312                  | 2.389                  | 2.306      | 2.420      | 2.411      | 2.387      |
| C1-P1 | 1.843      | 1.819      | 1.825      | 1.808                  | 1.829      | 1.821                  | 1.829                  | 1.777      | 1.801      | 1.800      | 1.801      |
| P1-C2 | 1.770      | 1.799      | 1.787      | 1.798                  | 1.777      | 1.796                  | 1.774                  | 1.777      | 1.762      | 1.769      | 1.766      |
| C2-P2 | 1.764      | 1.739      | 1.752      | 1.775                  | 1.842      | 1.833                  | 1.844                  | 1.850      | 1.845      | 1.846      | 1.849      |
| P2-C3 | 1.884      | 1.895      | 1.905      | 1.886                  | 1.896      | 1.893                  | 1.897                  | 1.890      | 1.896      | 1.895      | 1.897      |
| C3-P3 | 1.881      | 1.873      | 1.878      | 1.855                  | 1.870      | 1.867                  | 1.873                  | 1.879      | 1.888      | 1.889      | 1.888      |
| P3-C1 | 1.688      | 1.694      | 1.693      | 1.695                  | 1.693      | 1.687                  | 1.699                  | 1.760      | 1.744      | 1.753      | 1.753      |
| C4-P4 | 1.846      | 1.868      | 1.884      | 1.907                  | 1.911      | 1.924                  | 1.914                  | 1.908      | 1.916      | 1.917      | 1.916      |
| P4-C5 | 1.847      | 1.867      | 1.859      | 1.844                  | 1.852      | 1.860                  | 1.856                  | 1.880      | 1.868      | 1.871      | 1.871      |
| C5-P5 | 1.797      | 1.818      | 1.805      | 1.819                  | 1.784      | 1.831                  | 1.778                  | 1.777      | 1.773      | 1.778      | 1.777      |
| P5-C4 | 1.805      | 1.789      | 1.793      | 1.844                  | 1.902      | 1.889                  | 1.908                  | 1.921      | 1.917      | 1.918      | 1.917      |
| C6-P6 | 1.612      | 1.608      | 1.608      | 1.609                  | 1.624      | 1.638                  | 1.621                  | 1.642      | 1.612      | 1.617      | 1.617      |
| P4-C3 | 1.974      | 1.921      | 1.912      | 1.928                  | 1.922      | 1.910                  | 1.921                  | 1.920      | 1.921      | 1.923      | 1.924      |
| C4-P2 | 3.335      | 3.127      | 3.170      | 2.340                  | 1.916      | 1.968                  | 1.906                  | 1.894      | 1.893      | 1.892      | 1.893      |

*Tabelle 11. Mit B3LYP\*/SHAsvp berechnete interatomare Abstände [Å].*

|       | <i>48s</i> | <i>48t</i> | <i>49t</i> | <i>50t</i> <sup>#</sup> | <i>51t</i> | <i>52s</i> <sup>#</sup> | <i>52t</i> <sup>#</sup> | <i>53s</i> | <i>53t</i> | <i>54t</i> | <i>55t</i> |
|-------|------------|------------|------------|-------------------------|------------|-------------------------|-------------------------|------------|------------|------------|------------|
| Fe-C1 | 3.381      | 3.530      | 3.505      | 3.512                   | 2.955      | 3.326                   |                         | 2.185      | 2.233      | 2.210      | 2.198      |
| Fe-P1 | 2.443      | 2.475      | 2.511      | 2.427                   | 2.402      | 2.410                   |                         | 2.348      | 2.410      | 2.389      | 2.405      |
| Fe-C2 | 2.076      | 2.134      | 2.137      | 2.031                   | 2.068      | 1.925                   |                         | 2.064      | 2.191      | 2.176      | 2.189      |
| Fe-P2 | 2.389      | 2.602      | 2.506      | 2.725                   | 3.310      | 2.955                   |                         | 3.294      | 3.245      | 3.252      | 3.242      |
| Fe-C3 | 2.749      | 3.090      | 3.020      | 3.457                   | 3.535      | 3.480                   |                         | 3.209      | 3.137      | 3.136      | 3.090      |
| Fe-P3 | 3.858      | 4.129      | 4.068      | 4.260                   | 3.704      | 4.076                   |                         | 2.395      | 2.560      | 2.511      | 2.478      |
| Fe-C4 | 2.034      | 2.143      | 2.121      | 2.430                   | 3.274      | 2.965                   |                         | 3.364      | 3.297      | 3.308      | 3.303      |
| Fe-P4 | 2.479      | 2.807      | 2.771      | 3.191                   | 3.484      | 3.309                   |                         | 3.598      | 3.497      | 3.520      | 3.468      |
| Fe-C5 | 2.028      | 2.088      | 2.118      | 2.151                   | 2.140      | 1.995                   |                         | 2.267      | 2.221      | 2.251      | 2.217      |
| Fe-P5 | 2.391      | 2.377      | 2.402      | 2.300                   | 2.385      | 2.363                   |                         | 2.424      | 2.407      | 2.412      | 2.422      |
| Fe-C6 | 1.982      | 2.021      | 2.045      | 2.004                   | 1.980      | 1.865                   |                         | 1.890      | 1.999      | 1.981      | 1.983      |
| Fe-P6 | 2.455      | 2.457      | 2.425      | 2.426                   | 2.374      | 2.286                   |                         | 2.303      | 2.410      | 2.399      | 2.379      |
| C1-P1 | 1.845      | 1.823      | 1.829      | 1.810                   | 1.832      | 1.819                   |                         | 1.779      | 1.803      | 1.802      | 1.803      |
| P1-C2 | 1.774      | 1.801      | 1.790      | 1.802                   | 1.780      | 1.807                   |                         | 1.782      | 1.766      | 1.773      | 1.769      |
| C2-P2 | 1.768      | 1.745      | 1.755      | 1.782                   | 1.843      | 1.835                   |                         | 1.851      | 1.848      | 1.849      | 1.851      |
| P2-C3 | 1.885      | 1.901      | 1.909      | 1.889                   | 1.898      | 1.892                   |                         | 1.891      | 1.898      | 1.897      | 1.899      |
| C3-P3 | 1.881      | 1.871      | 1.878      | 1.854                   | 1.872      | 1.870                   |                         | 1.881      | 1.888      | 1.891      | 1.889      |
| P3-C1 | 1.691      | 1.696      | 1.695      | 1.697                   | 1.696      | 1.692                   |                         | 1.765      | 1.748      | 1.757      | 1.758      |
| C4-P4 | 1.846      | 1.868      | 1.885      | 1.911                   | 1.913      | 1.926                   |                         | 1.909      | 1.918      | 1.919      | 1.918      |
| P4-C5 | 1.848      | 1.869      | 1.862      | 1.846                   | 1.855      | 1.863                   |                         | 1.881      | 1.872      | 1.875      | 1.874      |
| C5-P5 | 1.803      | 1.822      | 1.808      | 1.825                   | 1.791      | 1.836                   |                         | 1.781      | 1.780      | 1.784      | 1.783      |
| P5-C4 | 1.809      | 1.796      | 1.799      | 1.853                   | 1.907      | 1.892                   |                         | 1.925      | 1.923      | 1.922      | 1.920      |
| C6-P6 | 1.619      | 1.615      | 1.615      | 1.616                   | 1.629      | 1.649                   |                         | 1.647      | 1.618      | 1.623      | 1.623      |
| P4-C3 | 1.979      | 1.927      | 1.914      | 1.933                   | 1.924      | 1.911                   |                         | 1.923      | 1.924      | 1.925      | 1.926      |
| C4-P2 | 3.321      | 3.079      | 3.130      | 2.304                   | 1.916      | 1.965                   |                         | 1.897      | 1.893      | 1.893      | 1.894      |

Als nächster Reaktionsschritt kommt nun die Addition eines weiteren Phosphaalkinmoleküls an **53t** in Betracht. Die beiden  $\pi$ -koordinierten Phosphaalkinmoleküle könnten dann analog zum entsprechenden Cyclopentadienylkobalt-Komplex **13** (Seite 76) durch sukzessive Bildung zweier P-C-Bindungen zum 1,3-Diphosphet cyclodimerisieren (Abbildung 91). Die mit B3LYP/SHAsvp berechneten Singulett- und Triplett-Strukturen sind in Abbildung 89 und



90 dargestellt. In Tabelle 35 und 36 sind die mit B3LYP/SHAsvp bzw. mit B3LYP\*/SHAsvp berechneten interatomaren Abstände der untersuchten Verbindungen aufgelistet.

Die durch Addition eines Phosphaalkinmoleküls an **53t** gebildeten Komplexe **56s** und **56t** besitzen nach den B3LYP Rechnungen eine relative Energie von -1.9 bzw. -5.7 kcal·mol<sup>-1</sup> im Vergleich zu **43s** + 2 **P≡CH**. Somit wäre **56t** um 3.8 kcal·mol<sup>-1</sup> stabiler als **56s** (Abbildung 94). Nach den B3LYP\*-Rechnungen ist dagegen mit relativen Energien von -4.8 bzw. -4.1 kcal·mol<sup>-1</sup> die Singulett-Struktur geringfügig, um 0.7 kcal·mol<sup>-1</sup>, begünstigt (Abbildung 95). Ähnlich verhalten sich die Übergangsstrukturen **57s<sup>#</sup>** und **57t<sup>#</sup>** und Zwischenstufen **58s** und **58t** der Cyclodimerisierung. So ist nach B3LYP **57t<sup>#</sup>** ( $E_{\text{rel}} = 1.4$  kcal·mol<sup>-1</sup>) um 4.7 kcal·mol<sup>-1</sup> stabiler als **57s<sup>#</sup>** ( $E_{\text{rel}} = 6.1$  kcal·mol<sup>-1</sup>) und **58t** ( $E_{\text{rel}} = -11.5$  kcal·mol<sup>-1</sup>) um 2.5 kcal·mol<sup>-1</sup> stabiler als **58s** ( $E_{\text{rel}} = -9.0$  kcal·mol<sup>-1</sup>). Nach den B3LYP\*-Rechnungen ist dagegen **57t<sup>#</sup>** ( $E_{\text{rel}} = 0.7$  kcal·mol<sup>-1</sup>) nur um 1.5 kcal·mol<sup>-1</sup> stabiler als **57s<sup>#</sup>** ( $E_{\text{rel}} = 2.2$  kcal·mol<sup>-1</sup>) und **58t** ( $E_{\text{rel}} = -12.0$  kcal·mol<sup>-1</sup>) ist sogar um 1.7 kcal·mol<sup>-1</sup> weniger stabil als **58s** ( $E_{\text{rel}} = -13.7$  kcal·mol<sup>-1</sup>). Somit kann nicht eindeutig beantwortet werden, ob der betreffende Reaktionsschritt als Singulett oder Triplett abläuft.

Beim nächsten Reaktionsschritt, der Bildung des 1,3-Diphosphetringes, sind die Verhältnisse dagegen eindeutiger. Hier sind in beiden Fällen die Singulett-Strukturen energetisch begünstigt. So ist nach B3LYP **59s<sup>#</sup>** ( $E_{\text{rel}} = -8.6$  kcal·mol<sup>-1</sup>) um 3.5 kcal·mol<sup>-1</sup> stabiler als **59t<sup>#</sup>** ( $E_{\text{rel}} = -5.1$  kcal·mol<sup>-1</sup>) und **60s** ( $E_{\text{rel}} = -47.5$  kcal·mol<sup>-1</sup>) um 2.8 kcal·mol<sup>-1</sup> stabiler als **60t** ( $E_{\text{rel}} = -44.7$  kcal·mol<sup>-1</sup>). Nach den B3LYP\*-Rechnungen ist **59s<sup>#</sup>** ( $E_{\text{rel}} = -13.2$  kcal·mol<sup>-1</sup>) um 6.6 kcal·mol<sup>-1</sup> stabiler als **59t<sup>#</sup>** ( $E_{\text{rel}} = -6.6$  kcal·mol<sup>-1</sup>) und **60s** ( $E_{\text{rel}} = -50.7$  kcal·mol<sup>-1</sup>) um 7.1 kcal·mol<sup>-1</sup> stabiler als **60t** ( $E_{\text{rel}} = -43.6$  kcal·mol<sup>-1</sup>). Die berechneten Aktivierungsenergien der untersuchten Reaktionen betragen 8.0 bzw. 0.4 kcal·mol<sup>-1</sup> (B3LYP\* 7.0 und 0.5 kcal·mol<sup>-1</sup>) für die Singulett-Reaktionen, **56s**  $\square$  **57s<sup>#</sup>**  $\square$  **58s** und **58s**  $\square$  **59s<sup>#</sup>**  $\square$  **60s**, und 7.1 bzw. 6.4 kcal·mol<sup>-1</sup> (B3LYP\* 4.8 und 5.4 kcal·mol<sup>-1</sup>) für die Triplett-Reaktionen, **56t**  $\square$  **57t<sup>#</sup>**  $\square$  **58t** und **58t**  $\square$  **59t<sup>#</sup>**  $\square$  **60t**.

Bei der Reaktion **56s**  $\square$  **57s<sup>#</sup>**  $\square$  **58s** sinkt der P6-C7-Abstand von 3.239 über 2.295 auf 1.784 Å, wohingegen die P6-C6-Bindungslänge von 1.613 auf 1.754 Å und die P7-C7-Bindungslänge von 1.596 auf 1.755 Å etwas länger werden. Die Fe-C6- und Fe-P7-Bindungen werden dabei von 2.021 auf 1.799 Å bzw. von 2.487 auf 2.150 Å deutlich kürzer, wohingegen die Fe-P6- und die Fe-C7-Bindungen von 2.470 auf 2.522 Å bzw. von 2.107 auf 2.212 Å etwas länger werden. Im nächsten Schritt, **58s**  $\square$  **59s<sup>#</sup>**  $\square$  **60s**, sinkt der P7-C6-Abstand von 2.846 über 2.624 auf 1.814 Å, wohingegen die anderen drei P-C-Bindungen im sich bildenden 1,3-Diphosphetring etwas länger werden. So steigt die P6-C6-Bindungslänge

von 1.754 auf 1.803 Å, die P7-C7-Bindungslänge von 1.755 auf 1.786 Å und die P6-C7-Bindungslänge von 1.784 auf 1.823 Å. Die Fe-C6- und Fe-P7-Bindungen verlängern sich dabei auf 2.130 bzw. 2.374 Å, wohingegen sich die Fe-P6- und die Fe-C7-Bindungen auf 2.318 bzw. 2.110 Å verkürzen.

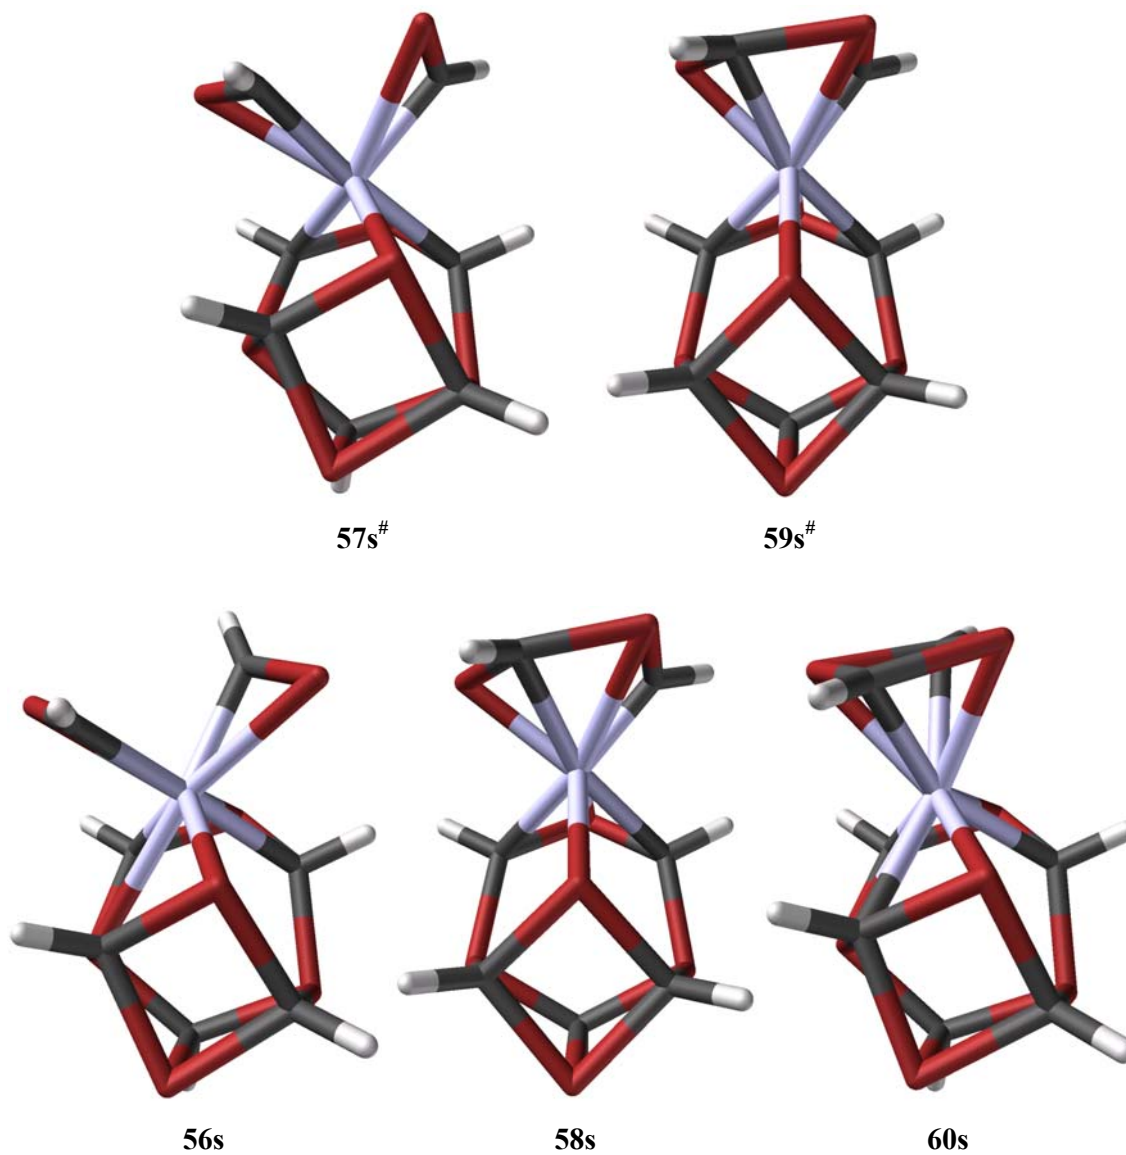

**Abbildung 31.** Berechnete Singulett-Strukturen der möglichen Zwischenstufen 56s, 58s und 60s und der Übergangsstrukturen 57s<sup>#</sup> und 59s<sup>#</sup>.

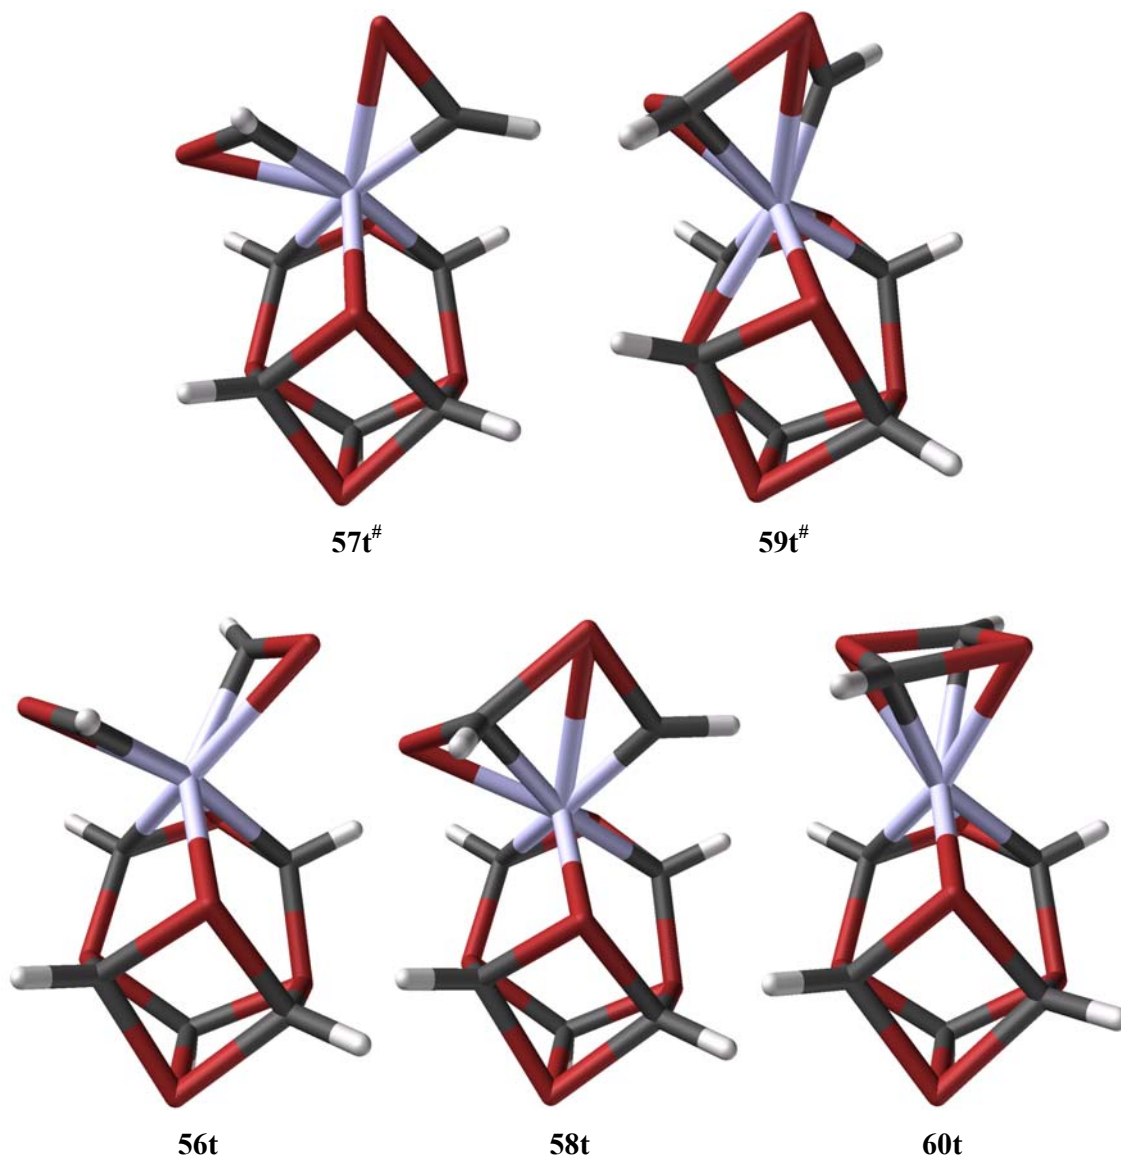

**Abbildung 32.** Berechnete Triplet-Strukturen der möglichen Zwischenstufen **56t**, **58t** und **60t** und der Übergangsstrukturen **57t<sup>#</sup>** und **59t<sup>#</sup>**.

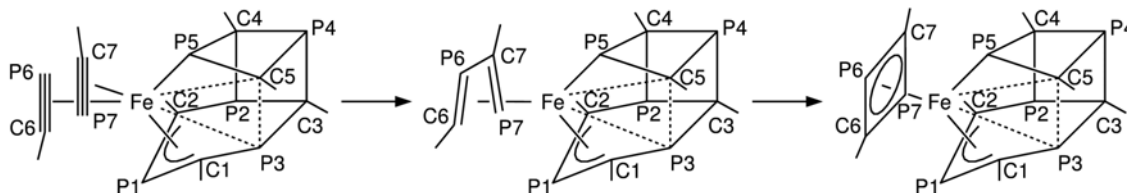

**Abbildung 33.** Schematische Darstellung der vermuteten Reaktionsschritte. Nach Addition eines weiteren Phosphaacetylenmoleküls an **53** unter Bildung von **56** (links) wird über die Zwischenstufe **58** (Mitte) ein 1,3-Diphosphetring **60** (rechts) gebildet.

**Tabelle 12.** Mit B3LYP/SHAsvp berechnete interatomare Abstände [ $\text{\AA}$ ].

|       | <i>44s</i> | <i>56t</i> | <i>45s<sup>#</sup></i> | <i>57t<sup>#</sup></i> | <i>46s</i> | <i>58t</i> | <i>47s<sup>#</sup></i> | <i>59t<sup>#</sup></i> | <i>48s</i> | <i>60t</i> |
|-------|------------|------------|------------------------|------------------------|------------|------------|------------------------|------------------------|------------|------------|
| Fe-C1 | 2.123      | 2.235      | 2.147                  | 2.332                  | 2.170      | 2.207      | 2.164                  | 2.220                  | 2.109      | 2.107      |
| Fe-P1 | 2.372      | 2.425      | 2.355                  | 2.355                  | 2.325      | 2.381      | 2.323                  | 2.387                  | 2.370      | 2.346      |
| Fe-C2 | 2.126      | 2.190      | 2.119                  | 2.154                  | 2.150      | 2.152      | 2.139                  | 2.100                  | 2.113      | 2.152      |
| Fe-P2 | 3.382      | 3.569      | 3.426                  | 3.463                  | 3.472      | 3.364      | 3.443                  | 3.371                  | 3.364      | 3.400      |
| Fe-C3 | 3.552      | 3.890      | 3.616                  | 3.883                  | 3.943      | 3.640      | 3.916                  | 3.522                  | 3.447      | 3.756      |
| Fe-P3 | 2.791      | 3.198      | 2.861                  | 3.316                  | 3.399      | 2.975      | 3.390                  | 2.772                  | 2.657      | 3.158      |
| Fe-C4 | 3.368      | 3.583      | 3.435                  | 3.456                  | 3.473      | 3.340      | 3.448                  | 3.398                  | 3.375      | 3.413      |
| Fe-P4 | 3.955      | 4.396      | 4.033                  | 4.386                  | 4.499      | 4.091      | 4.489                  | 3.929                  | 3.814      | 4.308      |
| Fe-C5 | 2.538      | 3.077      | 2.606                  | 3.165                  | 3.363      | 2.768      | 3.378                  | 2.491                  | 2.334      | 3.101      |
| Fe-P5 | 2.313      | 2.427      | 2.303                  | 2.436                  | 2.336      | 2.309      | 2.303                  | 2.311                  | 2.293      | 2.405      |
| Fe-C6 | 2.021      | 2.239      | 1.973                  | 1.950                  | 1.799      | 1.917      | 1.815                  | 1.902                  | 2.130      | 2.307      |
| Fe-P6 | 2.470      | 2.503      | 2.478                  | 2.490                  | 2.522      | 2.765      | 2.503                  | 2.795                  | 2.318      | 2.364      |
| Fe-C7 | 2.107      | 2.065      | 2.085                  | 2.013                  | 2.212      | 2.148      | 2.210                  | 2.217                  | 2.110      | 2.089      |
| Fe-P7 | 2.487      | 2.453      | 2.456                  | 2.545                  | 2.150      | 2.441      | 2.163                  | 2.317                  | 2.374      | 2.434      |
| C1-P1 | 1.771      | 1.769      | 1.763                  | 1.781                  | 1.791      | 1.766      | 1.789                  | 1.765                  | 1.776      | 1.793      |
| P1-C2 | 1.773      | 1.797      | 1.787                  | 1.780                  | 1.782      | 1.772      | 1.782                  | 1.780                  | 1.773      | 1.789      |
| C2-P2 | 1.837      | 1.856      | 1.850                  | 1.853                  | 1.857      | 1.843      | 1.856                  | 1.858                  | 1.856      | 1.853      |
| P2-C3 | 1.885      | 1.891      | 1.890                  | 1.884                  | 1.886      | 1.881      | 1.886                  | 1.890                  | 1.893      | 1.886      |
| C3-P3 | 1.878      | 1.876      | 1.874                  | 1.881                  | 1.883      | 1.881      | 1.884                  | 1.876                  | 1.874      | 1.881      |
| P3-C1 | 1.828      | 1.868      | 1.831                  | 1.851                  | 1.858      | 1.838      | 1.856                  | 1.809                  | 1.795      | 1.861      |
| C4-P4 | 1.916      | 1.920      | 1.915                  | 1.924                  | 1.926      | 1.922      | 1.926                  | 1.913                  | 1.908      | 1.926      |
| P4-C5 | 1.931      | 1.937      | 1.937                  | 1.935                  | 1.930      | 1.935      | 1.928                  | 1.931                  | 1.941      | 1.935      |
| C5-P5 | 1.873      | 1.902      | 1.874                  | 1.881                  | 1.895      | 1.877      | 1.892                  | 1.862                  | 1.867      | 1.907      |
| P5-C4 | 1.907      | 1.911      | 1.900                  | 1.890                  | 1.893      | 1.892      | 1.890                  | 1.904                  | 1.902      | 1.897      |
| C6-P6 | 1.613      | 1.592      | 1.625                  | 1.641                  | 1.754      | 1.685      | 1.761                  | 1.749                  | 1.803      | 1.797      |
| P6-C7 | 3.239      | 3.254      | 2.295                  | 2.270                  | 1.784      | 1.894      | 1.789                  | 1.829                  | 1.823      | 1.841      |
| C7-P7 | 1.596      | 1.609      | 1.635                  | 1.669                  | 1.755      | 1.723      | 1.754                  | 1.760                  | 1.786      | 1.804      |
| P7-C6 | 3.070      | 3.408      | 3.392                  | 4.066                  | 2.846      | 3.628      | 2.624                  | 2.483                  | 1.814      | 1.792      |
| P4-C3 | 1.928      | 1.939      | 1.929                  | 1.937                  | 1.939      | 1.932      | 1.938                  | 1.927                  | 1.922      | 1.938      |
| C4-P2 | 1.892      | 1.870      | 1.884                  | 1.880                  | 1.880      | 1.892      | 1.882                  | 1.884                  | 1.883      | 1.879      |
| C5-P3 | 1.993      | 1.917      | 1.978                  | 1.923                  | 1.885      | 1.964      | 1.886                  | 2.054                  | 2.051      | 1.906      |

**Tabelle 13.** Mit B3LYP\*/SHAsvp berechnete interatomare Abstände [ $\text{\AA}$ ].

|       | <b>56s</b> | <b>56t</b> | <b>57s<sup>#</sup></b> | <b>57t<sup>#</sup></b> | <b>58s</b> | <b>58t</b> | <b>59s<sup>#</sup></b> | <b>59t<sup>#</sup></b> | <b>60s</b> | <b>60t</b> |
|-------|------------|------------|------------------------|------------------------|------------|------------|------------------------|------------------------|------------|------------|
| Fe-C1 | 2.126      | 2.207      | 2.144                  | 2.305                  | 2.165      | 2.196      | 2.158                  | 2.195                  | 2.109      | 2.091      |
| Fe-P1 | 2.371      | 2.412      | 2.352                  | 2.343                  | 2.323      | 2.376      | 2.321                  | 2.380                  | 2.368      | 2.336      |
| Fe-C2 | 2.123      | 2.170      | 2.113                  | 2.139                  | 2.148      | 2.145      | 2.135                  | 2.098                  | 2.112      | 2.133      |
| Fe-P2 | 3.385      | 3.549      | 3.423                  | 3.459                  | 3.473      | 3.369      | 3.441                  | 3.378                  | 3.366      | 3.385      |
| Fe-C3 | 3.557      | 3.862      | 3.613                  | 3.868                  | 3.945      | 3.632      | 3.915                  | 3.531                  | 3.436      | 3.731      |
| Fe-P3 | 2.795      | 3.169      | 2.861                  | 3.292                  | 3.400      | 2.954      | 3.391                  | 2.777                  | 2.637      | 3.129      |
| Fe-C4 | 3.374      | 3.563      | 3.435                  | 3.454                  | 3.476      | 3.345      | 3.448                  | 3.408                  | 3.381      | 3.405      |
| Fe-P4 | 3.962      | 4.371      | 4.035                  | 4.371                  | 4.503      | 4.079      | 4.493                  | 3.945                  | 3.805      | 4.286      |
| Fe-C5 | 2.544      | 3.053      | 2.610                  | 3.142                  | 3.364      | 2.742      | 3.383                  | 2.504                  | 2.323      | 3.075      |
| Fe-P5 | 2.316      | 2.412      | 2.309                  | 2.419                  | 2.335      | 2.309      | 2.297                  | 2.314                  | 2.301      | 2.397      |
| Fe-C6 | 2.003      | 2.184      | 1.973                  | 1.929                  | 1.799      | 1.910      | 1.816                  | 1.899                  | 2.130      | 2.283      |
| Fe-P6 | 2.473      | 2.470      | 2.475                  | 2.467                  | 2.523      | 2.763      | 2.500                  | 2.788                  | 2.318      | 2.356      |
| Fe-C7 | 2.084      | 2.053      | 2.080                  | 2.002                  | 2.214      | 2.136      | 2.210                  | 2.195                  | 2.104      | 2.084      |
| Fe-P7 | 2.483      | 2.444      | 2.460                  | 2.554                  | 2.154      | 2.433      | 2.167                  | 2.302                  | 2.374      | 2.421      |
| C1-P1 | 1.775      | 1.774      | 1.768                  | 1.790                  | 1.795      | 1.770      | 1.794                  | 1.770                  | 1.782      | 1.798      |
| P1-C2 | 1.777      | 1.800      | 1.791                  | 1.785                  | 1.787      | 1.776      | 1.787                  | 1.784                  | 1.776      | 1.794      |
| C2-P2 | 1.838      | 1.854      | 1.850                  | 1.852                  | 1.856      | 1.844      | 1.856                  | 1.859                  | 1.858      | 1.853      |
| P2-C3 | 1.887      | 1.891      | 1.891                  | 1.886                  | 1.887      | 1.882      | 1.887                  | 1.891                  | 1.895      | 1.888      |
| C3-P3 | 1.879      | 1.877      | 1.876                  | 1.883                  | 1.884      | 1.883      | 1.885                  | 1.878                  | 1.875      | 1.882      |
| P3-C1 | 1.828      | 1.871      | 1.830                  | 1.858                  | 1.859      | 1.838      | 1.857                  | 1.813                  | 1.793      | 1.858      |
| C4-P4 | 1.918      | 1.922      | 1.918                  | 1.925                  | 1.928      | 1.924      | 1.929                  | 1.915                  | 1.909      | 1.927      |
| P4-C5 | 1.933      | 1.938      | 1.939                  | 1.936                  | 1.933      | 1.937      | 1.930                  | 1.935                  | 1.941      | 1.937      |
| C5-P5 | 1.873      | 1.905      | 1.873                  | 1.885                  | 1.897      | 1.877      | 1.893                  | 1.867                  | 1.864      | 1.906      |
| P5-C4 | 1.908      | 1.915      | 1.902                  | 1.894                  | 1.894      | 1.897      | 1.891                  | 1.906                  | 1.906      | 1.898      |
| C6-P6 | 1.619      | 1.601      | 1.627                  | 1.647                  | 1.757      | 1.688      | 1.765                  | 1.749                  | 1.808      | 1.801      |
| P6-C7 | 3.222      | 3.225      | 2.349                  | 2.278                  | 1.785      | 1.894      | 1.791                  | 1.832                  | 1.824      | 1.843      |
| C7-P7 | 1.603      | 1.614      | 1.634                  | 1.672                  | 1.759      | 1.728      | 1.757                  | 1.766                  | 1.792      | 1.806      |
| P7-C6 | 3.089      | 3.358      | 3.397                  | 4.070                  | 2.862      | 3.619      | 2.619                  | 2.482                  | 1.816      | 1.795      |
| P4-C3 | 1.930      | 1.942      | 1.931                  | 1.939                  | 1.941      | 1.934      | 1.941                  | 1.930                  | 1.923      | 1.939      |
| C4-P2 | 1.894      | 1.872      | 1.887                  | 1.883                  | 1.882      | 1.893      | 1.885                  | 1.885                  | 1.885      | 1.882      |
| C5-P3 | 1.996      | 1.920      | 1.983                  | 1.925                  | 1.887      | 1.970      | 1.888                  | 2.043                  | 2.071      | 1.913      |

Den letzten Reaktionsschritt sollte schließlich die Bindungsbildung zwischen C7 des neu gebildeten 1,3-Diphosphetringes und P5 darstellen (Abbildung 93). Die mit B3LYP/SHAsvp berechneten Singulett- und Triplett-Strukturen dieser Reaktion sind in Abbildung 92 dargestellt. In Tabelle 37 sind die mit B3LYP/SHAsvp bzw. mit B3LYP\*/SHAsvp berechneten interatomaren Abstände der untersuchten Verbindungen aufgelistet.

Nach den experimentellen Daten sollte das Produkt als paramagnetische Triplett-Verbindung vorliegen. Dies wird sowohl von den B3LYP als auch von den B3LYP\*-Rechnungen bestätigt. So ist nach den B3LYP-Rechnungen **41t** ( $E_{\text{rel}} = -50.7 \text{ kcal}\cdot\text{mol}^{-1}$ ) um  $11.2 \text{ kcal}\cdot\text{mol}^{-1}$  stabiler als **41s** ( $E_{\text{rel}} = -39.5 \text{ kcal}\cdot\text{mol}^{-1}$ ). Nach den B3LYP\*-Rechnungen ist **41t** ( $E_{\text{rel}} = -49.1 \text{ kcal}\cdot\text{mol}^{-1}$ ) um  $8.0 \text{ kcal}\cdot\text{mol}^{-1}$  stabiler als **41s** ( $E_{\text{rel}} = -41.1 \text{ kcal}\cdot\text{mol}^{-1}$ ). Dasselbe gilt auch für die Übergangsstruktur. So ist nach B3LYP **61t<sup>#</sup>** ( $E_{\text{rel}} = -35.6 \text{ kcal}\cdot\text{mol}^{-1}$ ) um  $15.7 \text{ kcal}\cdot\text{mol}^{-1}$  stabiler als **61s<sup>#</sup>** ( $E_{\text{rel}} = -19.9 \text{ kcal}\cdot\text{mol}^{-1}$ ). Nach den B3LYP\*-Rechnungen ist **61t<sup>#</sup>** ( $E_{\text{rel}} = -33.7 \text{ kcal}\cdot\text{mol}^{-1}$ ) um  $10.3 \text{ kcal}\cdot\text{mol}^{-1}$  stabiler als **61s<sup>#</sup>** ( $E_{\text{rel}} = -23.4 \text{ kcal}\cdot\text{mol}^{-1}$ ). Dagegen ist, wie weiter oben beschrieben, **60t** nach B3LYP um  $2.8 \text{ kcal}\cdot\text{mol}^{-1}$  bzw. nach B3LYP\* um  $7.1 \text{ kcal}\cdot\text{mol}^{-1}$  weniger stabil als die Singulett-Verbindung **60s**. Somit liegt der Schluss nahe, dass es während der Reaktion zu einem Singulett-Triplett-Übergang kommt, so dass die Aktivierungsenergie des letzten Reaktionsschrittes, **60s**  $\square$  **61t<sup>#</sup>**  $\square$  **41t**, nach B3LYP  $11.9 \text{ kcal}\cdot\text{mol}^{-1}$  und nach B3LYP\*  $17.0 \text{ kcal}\cdot\text{mol}^{-1}$  entspricht. Dabei fällt jedoch auf, dass die Zwischenstufe **60s** nach B3LYP\* um  $1.6 \text{ kcal}\cdot\text{mol}^{-1}$  stabiler ist als das Produkt **41t**, was nicht im Einklang mit den experimentellen Resultaten ist.

Bei der Reaktion **60s**  $\square$  **61t<sup>#</sup>**  $\square$  **41t** sinkt der P5-C7-Abstand von 2.843 über 1.882 auf  $1.823 \text{ \AA}$ . Die Bindungsbildung hat auch Auswirkungen auf die Bindungen im 1,3-Diphosphetring. So steigen die P6-C7- und P7-C7-Bindungslängen von  $1.823$  bzw.  $1.786 \text{ \AA}$  auf jeweils  $1.953 \text{ \AA}$  an, wohingegen die P6-C6- und P7-C6-Bindungslängen von  $1.803$  bzw.  $1.814 \text{ \AA}$  auf jeweils  $1.780 \text{ \AA}$  etwas kürzer werden. Zudem steigt der Fe-C7-Abstand von  $2.110$  auf  $2.863 \text{ \AA}$ . Beide Beobachtungen sind im Einklang mit einem als 1,2-Diphosphaallyl gebundenen System. Eine weitere strukturelle Konsequenz der Reaktion, die jedoch weniger mit der P5-C7-Bindungsbildung als vielmehr mit dem Singulett-Triplett-Übergang zusammenhängt, ist die Verlängerung der Fe-P3- und Fe-C5-Abstände von  $2.657$  bzw.  $2.334 \text{ \AA}$  in **60s** auf  $3.374$  bzw.  $3.448 \text{ \AA}$  in **41t** und die damit einhergehende Verkürzung der P3-C5-Bindung von  $2.051$  auf  $1.910 \text{ \AA}$ .

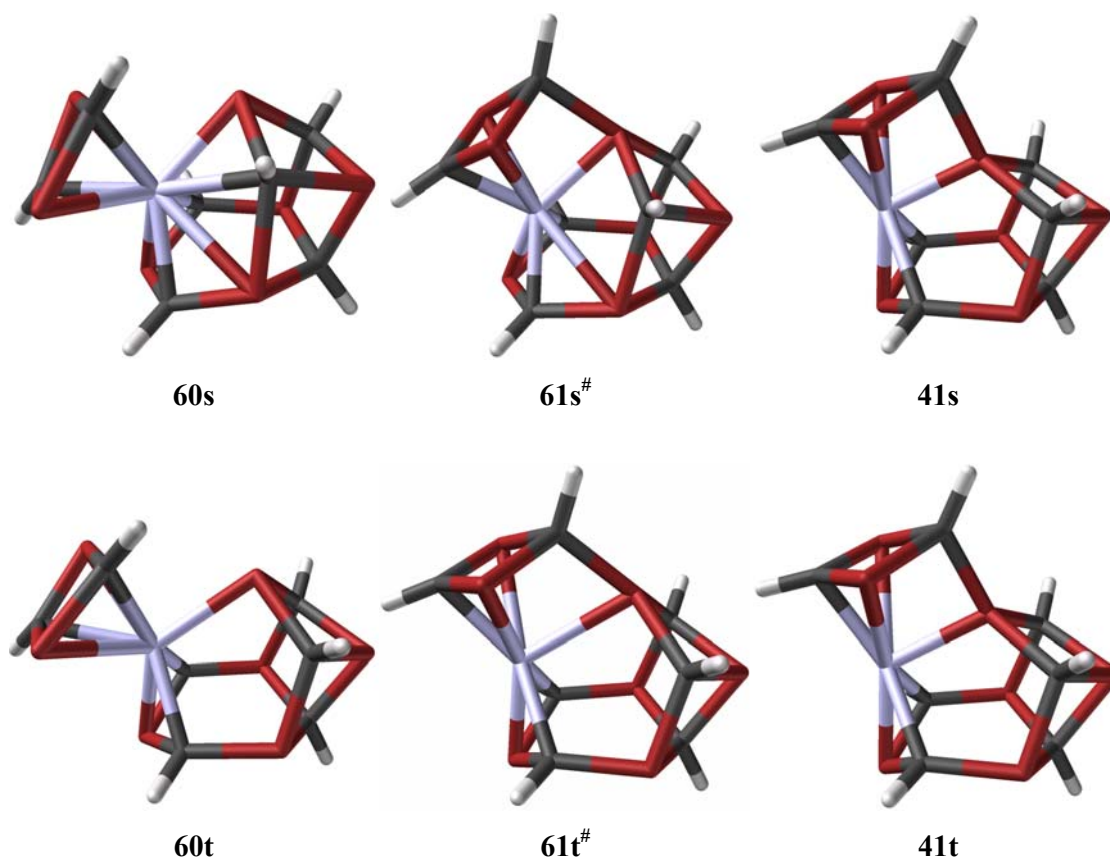

**Abbildung 34.** Berechnete Singulett- und Triplet-Strukturen der möglichen Zwischenstufe, **60s** und **60t**, des Produktes, **41s** und **41t**, und der Übergangsstruktur, **61s<sup>#</sup>** und **61t<sup>#</sup>**.

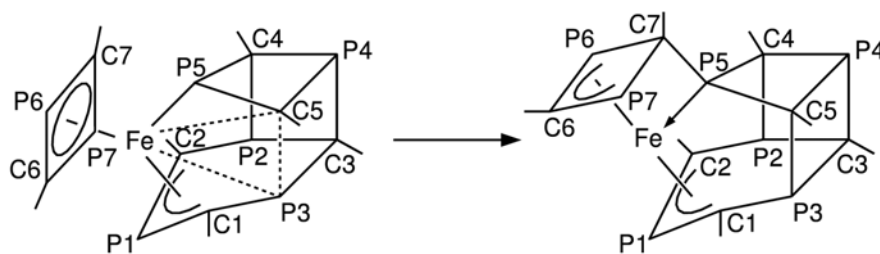

**Abbildung 35.** Schematische Darstellung des vermuteten letzten Reaktionsschrittes. Es wird schließlich eine P-C-Bindung zwischen C7 des neu entstandenen 1,3-Diphosphetringes und P5 gebildet, wodurch die P3-C5-Bindung gefestigt wird.

Tabelle 14. Berechnete interatomare Abstände [ $\text{\AA}$ ].

|       | $49s^{\#}$   |               | $61t^{\#}$   |               | $41s$        |               | $41t$        |               | $41t(tBu)^a$ |
|-------|--------------|---------------|--------------|---------------|--------------|---------------|--------------|---------------|--------------|
|       | <i>B3LYP</i> | <i>B3LYP*</i> | <i>B3LYP</i> | <i>B3LYP*</i> | <i>B3LYP</i> | <i>B3LYP*</i> | <i>B3LYP</i> | <i>B3LYP*</i> | <i>exp.</i>  |
| Fe-C1 | 2.026        | 2.031         | 2.075        | 2.066         | 2.111        | 2.094         | 2.074        | 2.064         | 2.112(5)     |
| Fe-P1 | 2.309        | 2.310         | 2.271        | 2.264         | 2.242        | 2.236         | 2.291        | 2.288         | 2.265(2)     |
| Fe-C2 | 2.039        | 2.033         | 2.074        | 2.066         | 2.112        | 2.094         | 2.074        | 2.065         | 1.131(6)     |
| Fe-P2 | 3.217        | 3.219         | 3.301        | 3.300         | 3.365        | 3.354         | 3.375        | 3.373         | -            |
| Fe-C3 | 3.324        | 3.316         | 3.752        | 3.749         | 3.812        | 3.798         | 3.848        | 3.845         | -            |
| Fe-P3 | 2.592        | 2.580         | 3.304        | 3.300         | 3.364        | 3.354         | 3.374        | 3.373         | -            |
| Fe-C4 | 3.262        | 3.273         | 3.374        | 3.375         | 3.369        | 3.364         | 3.448        | 3.446         | -            |
| Fe-P4 | 3.795        | 3.781         | 4.382        | 4.381         | 4.413        | 4.405         | 4.484        | 3.484         | -            |
| Fe-C5 | 2.478        | 2.452         | 3.380        | 3.375         | 3.369        | 3.364         | 3.448        | 3.446         | -            |
| Fe-P5 | 2.235        | 2.220         | 2.611        | 2.613         | 2.139        | 2.137         | 2.251        | 2.245         | 2.281(2)     |
| Fe-C6 | 2.051        | 2.042         | 2.150        | 2.129         | 2.032        | 2.017         | 2.172        | 2.145         | 2.121(5)     |
| Fe-P6 | 2.362        | 2.361         | 2.441        | 2.431         | 2.501        | 2.493         | 2.526        | 2.511         | 2.396(2)     |
| Fe-C7 | 2.603        | 2.621         | 2.626        | 2.609         | 2.804        | 2.801         | 2.863        | 2.853         | -            |
| Fe-P7 | 2.450        | 2.454         | 2.442        | 2.431         | 1.501        | 2.493         | 2.527        | 2.511         | 2.396(2)     |
| C1-P1 | 1.790        | 1.795         | 1.804        | 1.809         | 1.789        | 1.798         | 1.814        | 1.820         | 1.780(7)     |
| P1-C2 | 1.794        | 1.799         | 1.804        | 1.809         | 1.789        | 1.798         | 1.814        | 1.820         | 1.780(7)     |
| C2-P2 | 1.837        | 1.840         | 1.848        | 1.848         | 1.858        | 1.859         | 1.867        | 1.867         | 1.826(7)     |
| P2-C3 | 1.884        | 1.885         | 1.891        | 1.892         | 1.901        | 1.902         | 1.895        | 1.897         | -            |
| C3-P3 | 1.894        | 1.896         | 1.891        | 1.892         | 1.901        | 1.902         | 1.895        | 1.897         | -            |
| P3-C1 | 1.810        | 1.806         | 1.848        | 1.849         | 1.858        | 1.859         | 1.867        | 1.867         | 1.826(7)     |
| C4-P4 | 1.921        | 1.921         | 1.942        | 1.944         | 1.931        | 1.932         | 1.932        | 1.934         | -            |
| P4-C5 | 1.943        | 1.945         | 1.941        | 1.944         | 1.931        | 1.932         | 1.932        | 1.934         | -            |
| C5-P5 | 1.822        | 1.820         | 1.861        | 1.863         | 1.855        | 1.857         | 1.870        | 1.872         | -            |
| P5-C4 | 1.923        | 1.934         | 1.861        | 1.863         | 1.855        | 1.857         | 1.870        | 1.872         | -            |
| C6-P6 | 1.788        | 1.793         | 1.780        | 1.785         | 1.781        | 1.787         | 1.780        | 1.786         | 1.780(8)     |
| P6-C7 | 1.917        | 1.923         | 1.926        | 1.924         | 1.958        | 1.961         | 1.953        | 1.954         | 1.921(7)     |
| C7-P7 | 1.927        | 1.929         | 1.926        | 1.924         | 1.958        | 1.961         | 1.953        | 1.954         | 1.921(7)     |
| P7-C6 | 1.785        | 1.787         | 1.781        | 1.785         | 1.781        | 1.787         | 1.780        | 1.786         | 1.780(8)     |
| P4-C3 | 1.916        | 1.917         | 1.930        | 1.933         | 1.937        | 1.939         | 1.937        | 1.940         | -            |
| C4-P2 | 1.916        | 1.916         | 1.909        | 1.909         | 1.907        | 1.909         | 1.910        | 1.911         | -            |
| C5-P3 | 2.055        | 2.075         | 1.908        | 1.909         | 1.907        | 1.909         | 1.910        | 1.911         | -            |
| C7-P5 | 1.941        | 1.940         | 1.882        | 1.892         | 1.808        | 1.809         | 1.823        | 1.825         | -            |

<sup>a</sup> Experimentelle Bindungslängen der tert-Butyl-substituierten Struktur **41t(tBu)**.<sup>115</sup>



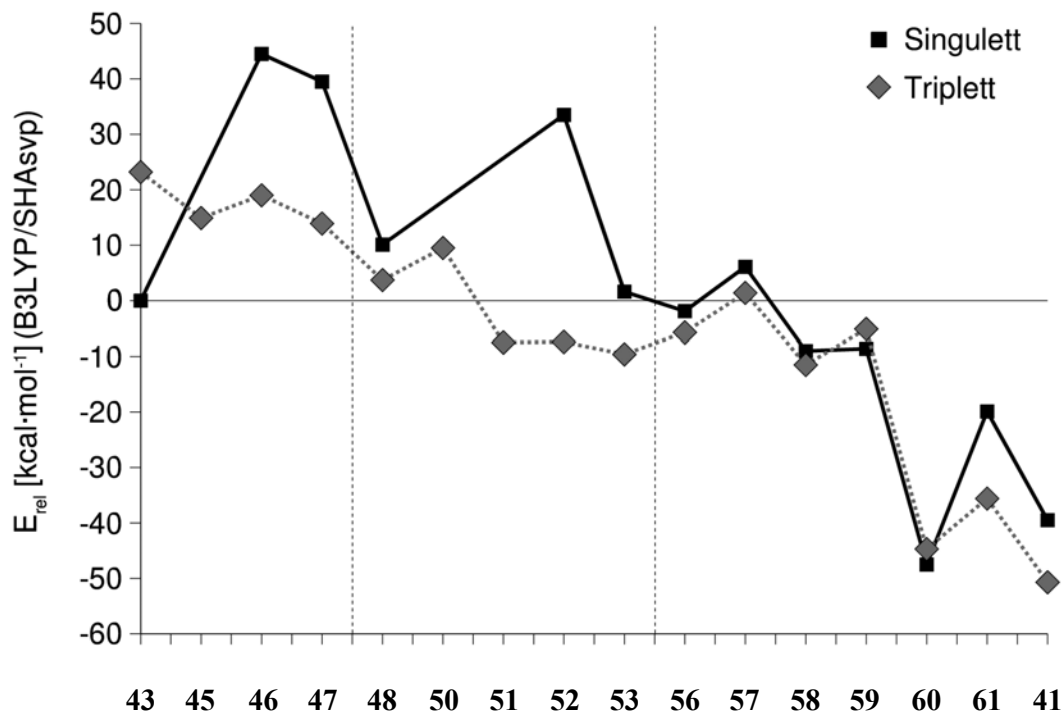

Abbildung 36. Mit B3LYP/SHAsvp berechnete relative Energien.

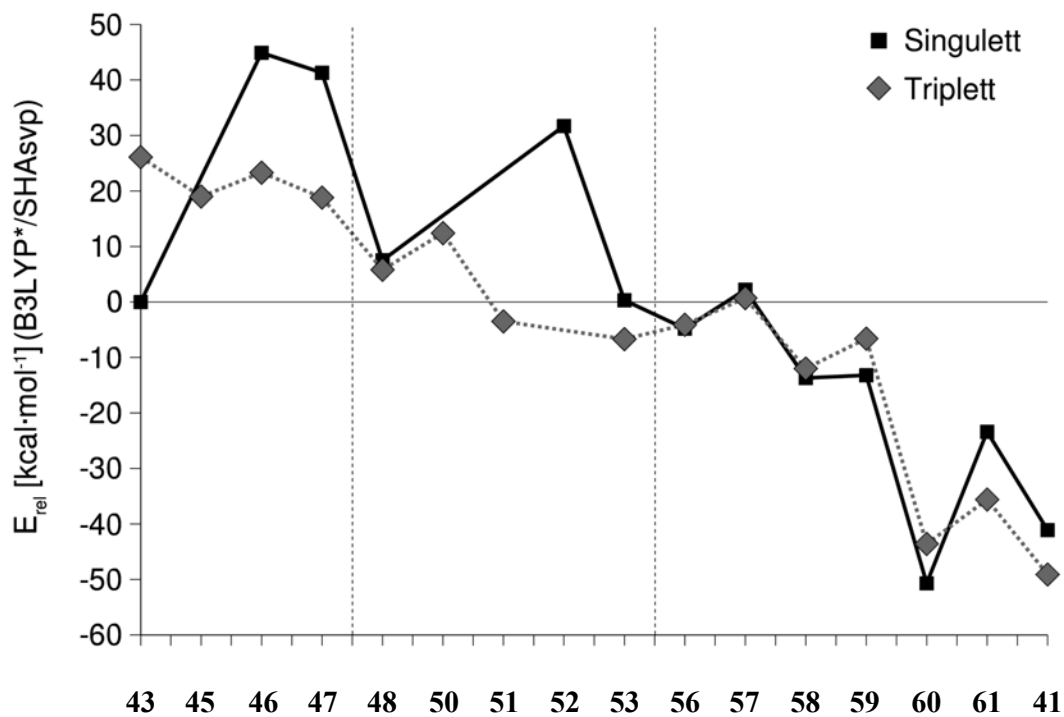

Abbildung 37. Mit B3LYP\*/SHAsvp berechnete relative Energien.

Als nächstes soll kurz auf die vorläufigen Ergebnisse zum Mechanismus der Umlagerung des vermuteten Primärproduktes **43** zum Pentaphosphaferrocen **38** eingegangen werden. Da es bei dieser Umlagerung zu einer Verschiebung einer CR-Gruppe oder eines Phosphoratoms vom 1,3,5-Triphosphininring an den 1,3-Diphosphetring kommt, muss eine Reaktion zwischen den beiden Ringen stattfinden. Als erster Schritt im Reaktionsmechanismus kommt wiederum der schon weiter oben beschriebene Angriff eines Phosphoratoms des Diphosphetringes an ein Kohlenstoffatom des Triphosphininringes unter Bildung der Triplett-Zwischenstufe **47t** in Betracht. Ausgehend von **47t** könnte es im nächsten Schritt zur Bildung einer P2-P3-Bindung kommen. Dadurch wird einer der beiden Fünfringe bereits gebildet (Abbildung 98). Nach diesen Überlegungen wäre es eine CR-Gruppe, die vom 1,3,5-Triphosphininring an den 1,3-Diphosphetring übertragen wird. Die berechneten Triplett-Strukturen dieses Reaktionsschrittes sind in Abbildung 96 dargestellt. In Tabelle 38 sind die berechneten interatomaren Abstände aufgelistet.

Die berechnete Aktivierungsenergie für die Reaktion **47t**  $\rightarrow$  **62t<sup>#</sup>**  $\rightarrow$  **63t** beträgt  $17.9 \text{ kcal}\cdot\text{mol}^{-1}$  (B3LYP\* 18.9). Dabei ist die berechnete Triplett-Zwischenstufe **63t** mit einer relativen Energie von  $11.0 \text{ kcal}\cdot\text{mol}^{-1}$  (B3LYP\* 15.5) wesentlich stabiler als die entsprechende Singulett-Struktur **63s** mit  $45.2 \text{ kcal}\cdot\text{mol}^{-1}$  (B3LYP\* 46.4). Bei der Reaktion sinkt der P2-P3-Abstand von 3.278 über 3.042 auf 2.269 Å. Dagegen steigen die P3-C3- und die P4-C3-Bindungslängen, die bereits beim Übergang von **43s** auf **47t** von jeweils 1.766 auf 1.878 bzw. 1.915 Å angestiegen sind, weiter auf jeweils 1.900 Å an. Bei der Reaktion werden die P3-C3- und die P4-C3-Bindungen somit sukzessive geschwächt. Außerdem kommt es zu einer Verschiebung des Eisenatoms, das in **63t** nun nicht mehr wie in **47t** über die 1,3-Diphosphaallylgruppe P1-C2-P2 koordiniert ist, sondern über die 2-Phosphaallylgruppe C1-P1-C2. Dies spiegelt sich im Fe-P2-Abstand, der von 2.411 auf 3.168 Å ansteigt, und im Fe-C1-Abstand wider, der von 3.321 auf 2.068 Å sinkt. Zugleich wird die P2-C2-Bindung von 1.768 auf 1.874 Å länger, während die P1-C1-Bindung von 1.832 auf 1.796 Å etwas kürzer wird. Am stärksten sind jedoch die Auswirkungen auf die P3-C1-Bindung, die von 1.690 Å in **47t** auf 1.874 Å in **63t** wesentlich länger wird.

Der weitere Reaktionsverlauf ist noch nicht vollständig geklärt. Es sollte jedoch zu einem Bruch der P3-C3- und der P4-C3-Bindungen kommen. Als mögliche Zwischenstufen wurden daher die beiden Carbenkomplexe **66s** und **66t** (Abbildung 97) in Betracht gezogen. Diese besitzen jedoch mit  $38.7 \text{ kcal}\cdot\text{mol}^{-1}$  (B3LYP\* 38.6) für **66s** und  $40.7 \text{ kcal}\cdot\text{mol}^{-1}$  (B3LYP\* 42.4) für **66t** vergleichsweise hohe relative Energien, so dass sie wahrscheinlich nicht als Zwischenstufen der untersuchten Umlagerung in Frage kommen. Dagegen besitzen die

Strukturen **64s** mit  $17.2 \text{ kcal}\cdot\text{mol}^{-1}$  und **64t** mit  $4.9 \text{ kcal}\cdot\text{mol}^{-1}$  (B3LYP\* 10.4) wesentlich günstigere relative Energien. Diese Strukturen kämen somit als mögliche Zwischenstufen in Betracht, die in einem letzten Schritt durch Bruch der P4-C5-Bindung zum Produkt **38s** abreagieren. Die mit B3LYP berechnete Aktivierungsenergie der betrachteten Reaktion ist im Singulett-Fall, **64s**  $\square$  **65s<sup>#</sup>**  $\square$  **38s**, mit  $0.1 \text{ kcal}\cdot\text{mol}^{-1}$  verschwindend gering, was erklären könnte, warum mit B3LYP\* keine entsprechende Struktur **64s** gefunden werden konnte. Die Aktivierungsbarriere der Triplett-Reaktion, **64t**  $\square$  **65t<sup>#</sup>**  $\square$  **38s**, ist mit  $13.8 \text{ kcal}\cdot\text{mol}^{-1}$  (B3LYP\* 13.3) deutlich größer, so dass die Reaktion wahrscheinlich über einen Triplett-Singulett-Übergang und eine nachfolgende Singulett-Übergangsstruktur verläuft. Bei dieser Reaktion steigt der P4-C5-Abstand von  $1.903 \text{ \AA}$  in **64t** auf  $2.751 \text{ \AA}$  in **38s** an, wohingegen die C3-C5-Bindungslänge von  $1.469$  auf  $1.411 \text{ \AA}$ , die P4-C3-Bindungslänge von  $1.976$  auf  $1.790 \text{ \AA}$ , die P4-C4-Bindungslänge von  $1.870$  auf  $1.780 \text{ \AA}$  und die P5-C5-Bindungslänge von  $1.918$  auf  $1.790 \text{ \AA}$  sinken.

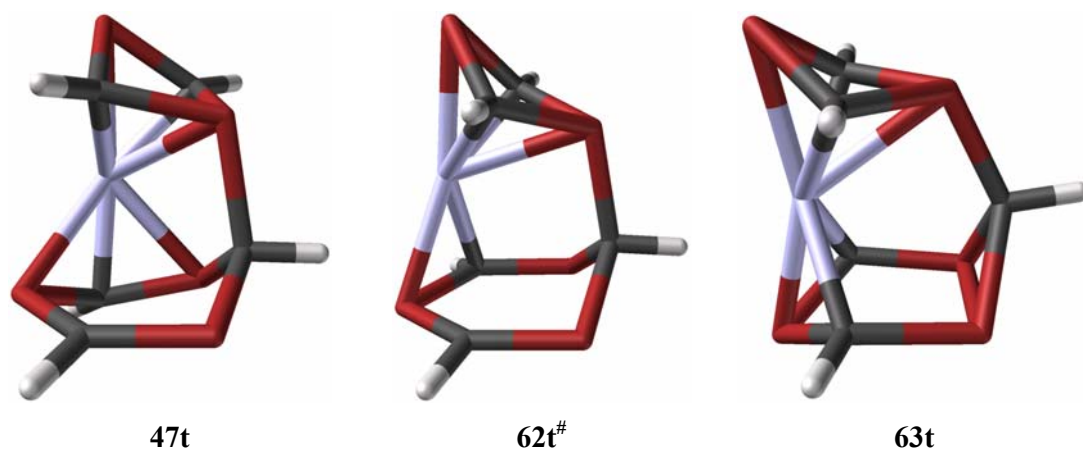

*Abbildung 38. Berechnete Triplett-Strukturen der möglichen Zwischenstufen, **47t** und **63t**, und der zugehörigen Übergangsstruktur **62t<sup>#</sup>**.*

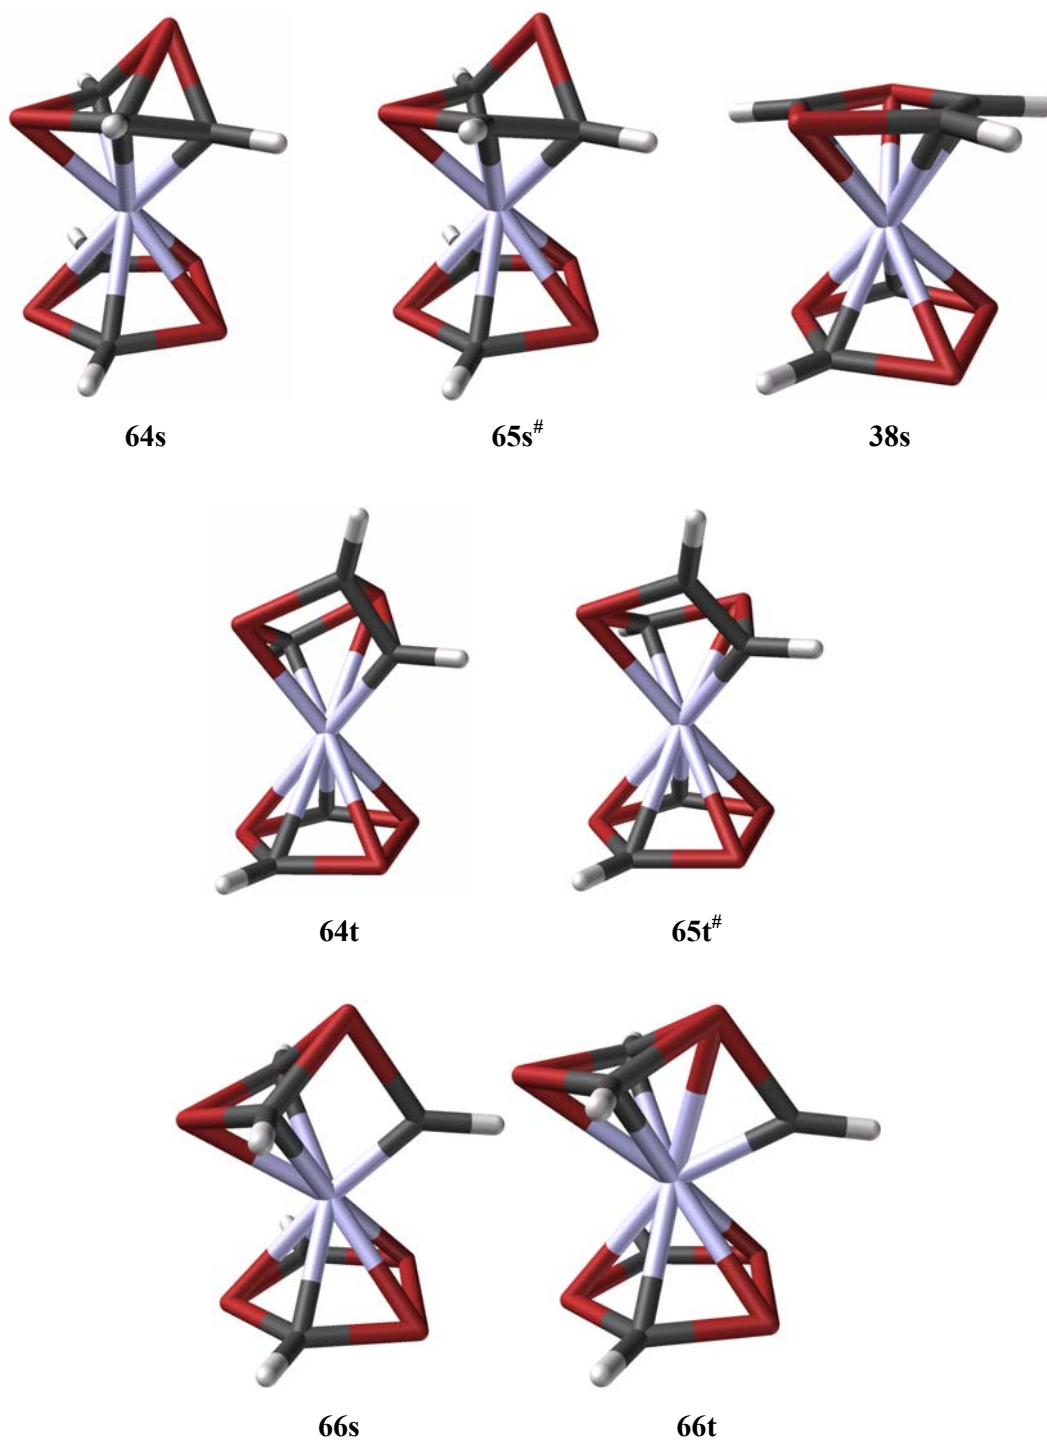

*Abbildung 39.* Berechnete Strukturen der möglichen Zwischenstufe 47, des Produktes 38s und der zugehörigen Übergangsstruktur 65<sup>#</sup>. Die als mögliche Zwischenstufen in Betracht gezogenen Strukturen 66s und 66t besitzen eine zu hohe Energie, um als mögliche Zwischenstufen in Frage zu kommen.

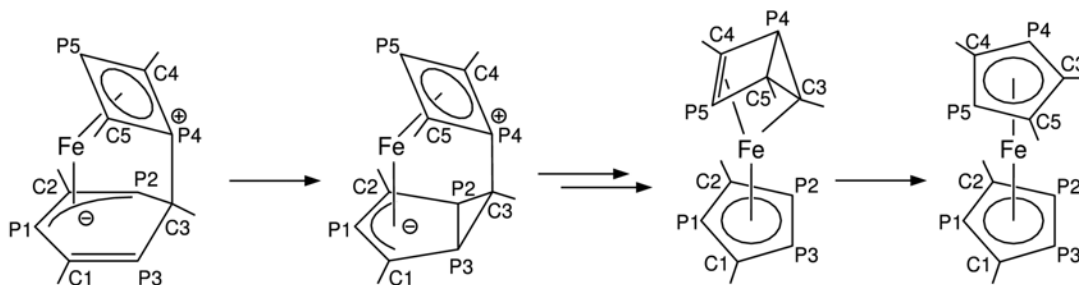

**Abbildung 40.** Mögliche Reaktionsschritte bei der Umlagerung der Zwischenstufe **47t** (links) über die beiden Zwischenstufen **63t** (Mitte links) und **64t** (Mitte rechts) zum Pentaphosphaferrocen **38s** (rechts).

**Tabelle 15.** Mit B3LYP/SHAsvp berechnete interatomare Abstände [ $\text{\AA}$ ].

|       | <b>50t<sup>#</sup></b> | <b>51s</b> | <b>63t</b> | <b>52s</b> | <b>64t</b> | <b>53s<sup>#</sup></b> | <b>65t<sup>#</sup></b> | <b>54s</b> | <b>66t</b> | <b>38s</b> | <b>38s(tBu)<br/>exp.<sup>a</sup></b> |
|-------|------------------------|------------|------------|------------|------------|------------------------|------------------------|------------|------------|------------|--------------------------------------|
| Fe-C1 | 2.759                  | 2.041      | 2.068      | 2.206      | 2.427      | 2.204                  | 2.418                  | 2.162      | 2.263      | 2.134      | 2.208(7)                             |
| Fe-P1 | 2.323                  | 2.244      | 2.262      | 2.423      | 2.598      | 2.415                  | 2.576                  | 1.486      | 2.509      | 2.365      | 2.330(3)                             |
| Fe-C2 | 2.282                  | 2.041      | 2.068      | 2.126      | 2.352      | 2.122                  | 2.324                  | 2.162      | 2.263      | 2.134      | 2.208(7)                             |
| Fe-P2 | 3.157                  | 3.287      | 3.168      | 2.375      | 2.501      | 2.375                  | 2.501                  | 2.408      | 2.445      | 2.402      | 2.360(2)                             |
| Fe-C3 | 2.909                  | 3.090      | 2.886      | 1.934      | 1.917      | 1.951                  | 1.963                  | 1.779      | 1.881      | 2.124      | 2.192(7)                             |
| Fe-P3 | 3.512                  | 3.287      | 3.168      | 2.412      | 2.503      | 2.410                  | 2.489                  | 2.408      | 2.445      | 2.402      | 2.360(2)                             |
| Fe-C4 | 2.010                  | 2.009      | 2.022      | 2.071      | 2.075      | 2.060                  | 2.098                  | 2.145      | 2.078      | 2.143      | 2.242(9)                             |
| Fe-P4 | 2.519                  | 2.709      | 2.540      | 2.898      | 2.748      | 2.896                  | 2.521                  | 2.707      | 2.355      | 2.362      | 2.316(2)                             |
| Fe-C5 | 1.979                  | 2.009      | 2.022      | 2.054      | 2.733      | 2.037                  | 2.664                  | 2.145      | 2.078      | 2.124      | 2.192(7)                             |
| Fe-P5 | 2.382                  | 2.310      | 2.412      | 2.233      | 2.401      | 2.236                  | 2.477                  | 2.396      | 2.514      | 2.362      | 2.316(2)                             |
| C1-P1 | 1.793                  | 1.803      | 1.796      | 1.775      | 1.758      | 1.775                  | 1.753                  | 1.777      | 1.771      | 1.775      |                                      |
| P1-C2 | 1.810                  | 1.803      | 1.796      | 1.776      | 1.775      | 1.776                  | 1.780                  | 1.777      | 1.771      | 1.775      |                                      |
| C2-P2 | 1.751                  | 1.872      | 1.874      | 1.777      | 1.762      | 1.778                  | 1.762                  | 1.773      | 1.764      | 1.777      |                                      |
| P2-C3 | 1.867                  | 1.898      | 1.900      | 3.468      | 3.535      | 3.503                  | 3.669                  | 3.075      | 2.807      | 3.379      |                                      |
| C3-P3 | 1.896                  | 1.898      | 1.900      | 3.149      | 3.416      | 3.155                  | 3.358                  | 3.075      | 2.807      | 3.807      |                                      |
| P3-C1 | 1.730                  | 1.872      | 1.874      | 1.766      | 1.766      | 1.767                  | 1.771                  | 1.773      | 1.764      | 1.777      |                                      |
| C4-P4 | 1.880                  | 1.867      | 1.879      | 1.857      | 1.870      | 1.845                  | 1.810                  | 1.883      | 1.874      | 1.780      |                                      |
| P4-C5 | 1.865                  | 1.867      | 1.879      | 2.077      | 1.903      | 2.127                  | 2.397                  | 1.883      | 1.874      | 2.751      |                                      |
| C5-P5 | 1.819                  | 1.816      | 1.805      | 1.906      | 1.918      | 1.902                  | 1.915                  | 1.788      | 1.784      | 1.790      |                                      |
| P5-C4 | 1.806                  | 1.816      | 1.805      | 1.786      | 1.775      | 1.794                  | 1.775                  | 1.788      | 1.784      | 1.780      |                                      |
| P4-C3 | 1.921                  | 1.850      | 1.864      | 1.793      | 1.976      | 1.794                  | 2.015                  | 1.839      | 1.789      | 1.790      |                                      |
| P2-P3 | 3.042                  | 2.252      | 2.269      | 2.197      | 2.209      | 2.196                  | 2.260                  | 2.194      | 2.234      | 2.180      |                                      |
| C3-C5 | 3.167                  | 3.031      | 3.096      | 1.499      | 1.469      | 1.484                  | 1.386                  | 2.440      | 2.739      | 1.411      |                                      |

<sup>a</sup> Experimentelle Werte der tert-Butyl-substituierten Verbindung.<sup>112</sup>

**Tabelle 16.** Mit B3LYP\*/SHAsvp berechnete interatomare Abstände [Å].

|       | <b>62t<sup>#</sup></b> | <b>63s</b> | <b>63t</b> | <b>64s</b> | <b>64t</b> | <b>65s<sup>#</sup></b> | <b>65t<sup>#</sup></b> | <b>66s</b> | <b>66t</b> | <b>38s</b> | <b>38s(tBu)<br/>exp.<sup>a</sup></b> |
|-------|------------------------|------------|------------|------------|------------|------------------------|------------------------|------------|------------|------------|--------------------------------------|
| Fe-C1 | 2.813                  | 2.036      | 2.060      | -          | 2.408      | -                      | 2.409                  | 2.149      | 2.241      | 2.127      | 2.208(7)                             |
| Fe-P1 | 2.316                  | 2.245      | 2.256      | -          | 2.575      | -                      | 2.555                  | 2.486      | 2.498      | 2.360      | 2.330(3)                             |
| Fe-C2 | 2.266                  | 2.036      | 2.060      | -          | 2.325      | -                      | 2.281                  | 2.149      | 2.241      | 2.127      | 2.208(7)                             |
| Fe-P2 | 3.159                  | 3.295      | 3.176      | -          | 2.486      | -                      | 2.489                  | 2.405      | 2.436      | 2.397      | 2.360(2)                             |
| Fe-C3 | 2.935                  | 3.102      | 2.899      | -          | 1.918      | -                      | 1.962                  | 1.781      | 1.889      | 2.118      | 2.192(7)                             |
| Fe-P3 | 3.563                  | 3.295      | 3.176      | -          | 2.491      | -                      | 2.480                  | 2.405      | 2.436      | 2.397      | 2.360(2)                             |
| Fe-C4 | 2.003                  | 2.001      | 2.012      | -          | 2.060      | -                      | 2.076                  | 2.135      | 2.072      | 2.136      | 2.242(9)                             |
| Fe-P4 | 2.517                  | 2.718      | 2.536      | -          | 2.742      | -                      | 2.525                  | 2.705      | 2.356      | 2.358      | 2.316(2)                             |
| Fe-C5 | 1.968                  | 2.001      | 2.012      | -          | 2.732      | -                      | 2.655                  | 2.135      | 2.072      | 2.118      | 2.192(7)                             |
| Fe-P5 | 2.369                  | 2.301      | 2.401      | -          | 2.385      | -                      | 2.452                  | 2.394      | 2.501      | 2.358      | 2.316(2)                             |
| C1-P1 | 1.796                  | 1.809      | 1.802      | -          | 1.761      | -                      | 1.755                  | 1.781      | 1.774      | 1.779      |                                      |
| P1-C2 | 1.815                  | 1.809      | 1.802      | -          | 1.778      | -                      | 1.785                  | 1.781      | 1.774      | 1.779      |                                      |
| C2-P2 | 1.751                  | 1.872      | 1.875      | -          | 1.766      | -                      | 1.767                  | 1.777      | 1.767      | 1.780      |                                      |
| P2-C3 | 1.866                  | 1.901      | 1.902      | -          | 3.503      | -                      | 3.646                  | 3.070      | 2.805      | 3.360      |                                      |
| C3-P3 | 1.899                  | 1.901      | 1.902      | -          | 3.388      | -                      | 3.319                  | 3.070      | 2.805      | 3.792      |                                      |
| P3-C1 | 1.728                  | 1.872      | 1.875      | -          | 1.768      | -                      | 1.775                  | 1.777      | 1.767      | 1.780      |                                      |
| C4-P4 | 1.881                  | 1.869      | 1.880      | -          | 1.872      | -                      | 1.817                  | 1.887      | 1.875      | 1.784      |                                      |
| P4-C5 | 1.864                  | 1.869      | 1.880      | -          | 1.908      | -                      | 2.395                  | 1.887      | 1.875      | 2.757      |                                      |
| C5-P5 | 1.827                  | 1.823      | 1.811      | -          | 1.922      | -                      | 1.917                  | 1.793      | 1.789      | 1.793      |                                      |
| P5-C4 | 1.812                  | 1.823      | 1.811      | -          | 1.782      | -                      | 1.780                  | 1.793      | 1.789      | 1.784      |                                      |
| P4-C3 | 1.923                  | 1.852      | 1.863      | -          | 1.979      | -                      | 2.004                  | 1.840      | 1.788      | 1.793      |                                      |
| P2-P3 | 3.055                  | 2.253      | 2.272      | -          | 2.214      | -                      | 2.210                  | 2.196      | 2.236      | 2.185      |                                      |
| C3-C5 | 3.176                  | 3.027      | 3.099      | -          | 1.468      | -                      | 1.390                  | 2.438      | 2.737      | 1.413      |                                      |

<sup>a</sup> Experimentelle Werte der tert-Butyl-substituierten Verbindung.<sup>112</sup>

*Tabelle 17. Mit B3LYP/SHAsvp und B3LYP\*/SHAsvp berechnete absolute Energien  $E$  [Hartree], Nullpunktsschwingungsenergien ZPE [kcal·mol<sup>-1</sup>], relative Energien  $E_{rel}$  [kcal·mol<sup>-1</sup>] und ZPE korrigierte relative Energien  $E_{rel,ZPE}$  [kcal·mol<sup>-1</sup>].*

| <i>Struktur</i>        | <i>B3LYP</i> |            |                        |                            | <i>B3LYP*</i> |                        |
|------------------------|--------------|------------|------------------------|----------------------------|---------------|------------------------|
|                        | <i>E</i>     | <i>ZPE</i> | <i>E<sub>rel</sub></i> | <i>E<sub>rel,ZPE</sub></i> | <i>E</i>      | <i>E<sub>rel</sub></i> |
| <b>43s</b>             | -3163.22428  | 55.7       | 0.0                    | 0.0                        | -3162.49927   | 0.0                    |
| <b>43t</b>             | -3163.18726  | 54.2       | 23.2                   | 21.7                       | -3162.45766   | 26.1                   |
| <b>44t</b>             | -3163.20728  | 54.6       | 10.7                   | 9.6                        | -3162.47500   | 15.2                   |
| <b>45t</b>             | -3163.20054  | 54.2       | 14.9                   | 13.4                       | -3162.46899   | 19.0                   |
| <b>46s<sup>#</sup></b> | -3163.15327  | 54.6       | 44.5                   | 43.4                       | -3162.42771   | 44.9                   |
| <b>46t<sup>#</sup></b> | -3163.19407  | 54.4       | 19.0                   | 17.7                       | -3162.46218   | 23.3                   |
| <b>47s</b>             | -3163.16137  | 55.2       | 39.5                   | 39.0                       | -3162.43353   | 41.3                   |
| <b>47t</b>             | -3163.20212  | 55.0       | 13.9                   | 13.2                       | -3162.46935   | 18.8                   |
| <b>PCH</b>             | -379.87044   | 8.8        | -                      | -                          | -379.75378    | -                      |
| <b>48s</b>             | -3543.08037  | 65.6       | 9.0                    | 10.1                       | -3542.24102   | 7.5                    |
| <b>48t</b>             | -3543.08887  | 64.6       | 3.7                    | 3.8                        | -3542.24387   | 5.8                    |
| <b>49t</b>             | -3543.08600  | 64.5       | 5.5                    | 5.5                        | -3542.24050   | 7.8                    |
| <b>50t<sup>#</sup></b> | -3543.07962  | 64.3       | 9.5                    | 9.3                        | -3542.23330   | 12.4                   |
| <b>51t</b>             | -3543.10665  | 65.2       | -7.5                   | -6.8                       | -3542.25858   | -3.5                   |
| <b>52s<sup>#</sup></b> | -3543.04125  | 64.8       | 33.5                   | 33.8                       | -3542.20254   | 31.7                   |
| <b>52t<sup>#</sup></b> | -3543.10650  | 65.2       | -7.4                   | -6.7                       |               |                        |
| <b>53s</b>             | -3543.09216  | 66.4       | 1.6                    | 3.5                        | -3542.25265   | 0.3                    |
| <b>53t</b>             | -3543.10998  | 65.3       | -9.6                   | -8.8                       | -3542.26375   | -6.7                   |
| <b>54t</b>             | -3543.11296  | 65.2       | -11.4                  | -10.7                      | -3542.26615   | -8.2                   |
| <b>55t</b>             | -3543.11401  | 65.2       | -12.1                  | -11.4                      | -3542.26732   | -9.0                   |
| <b>56s</b>             | -3922.96817  | 76.6       | -1.9                   | 1.4                        | -3922.01454   | -4.8                   |
| <b>56t</b>             | -3922.97430  | 75.5       | -5.7                   | -3.5                       | -3922.01344   | -4.1                   |
| <b>57s<sup>#</sup></b> | -3922.95541  | 76.6       | 6.1                    | 9.4                        | -3922.00331   | 2.2                    |
| <b>57t<sup>#</sup></b> | -3922.96299  | 75.7       | 1.4                    | 3.8                        | -3922.00572   | 0.7                    |
| <b>58s</b>             | -3922.97949  | 78.2       | -9.0                   | -4.1                       | -3922.02866   | -13.7                  |
| <b>58t</b>             | -3922.98354  | 77.1       | -11.5                  | -7.7                       | -3922.02599   | -12.0                  |
| <b>59s<sup>#</sup></b> | -3922.97887  | 77.8       | -8.6                   | -4.1                       | -3922.02788   | -13.2                  |
| <b>59t<sup>#</sup></b> | -3922.97331  | 76.8       | -5.1                   | -1.6                       | -3922.01734   | -6.6                   |
| <b>60s</b>             | -3923.04091  | 78.9       | -47.5                  | -41.9                      | -3922.08767   | -50.7                  |
| <b>60t</b>             | -3923.03639  | 77.8       | -44.7                  | -40.2                      | -3922.07626   | -43.6                  |
| <b>61s<sup>#</sup></b> | -3922.99680  | 77.9       | -19.9                  | -15.3                      | -3922.04419   | -23.4                  |

|                        | <i>B3LYP</i> |      |       | <i>B3LYP*</i> |             |       |
|------------------------|--------------|------|-------|---------------|-------------|-------|
| <b>61t<sup>#</sup></b> | -3923.02197  | 78.0 | -35.6 | -30.9         | -3922.06053 | -33.7 |
| <b>41s</b>             | -3923.02814  | 78.8 | -39.5 | -34.0         | -3922.07228 | -41.1 |
| <b>41t</b>             | -3923.04599  | 78.4 | -50.7 | -45.6         | -3922.08507 | -49.1 |
| <b>62t<sup>#</sup></b> | -3163.17360  | 54.4 | 31.8  | 30.5          | -3162.43918 | 37.7  |
| <b>63s</b>             | -3163.15216  | 55.4 | 45.2  | 44.9          | -3162.42536 | 46.4  |
| <b>63t</b>             | -3163.20683  | 55.2 | 11.0  | 10.5          | -3162.47457 | 15.5  |
| <b>64s</b>             | -3163.19681  | 54.9 | 17.2  | 16.4          | -           | -     |
| <b>64t</b>             | -3163.21637  | 54.6 | 4.9   | 3.8           | -3162.48264 | 10.4  |
| <b>65s<sup>#</sup></b> | -3163.19678  | 54.7 | 17.3  | 16.3          | -           | -     |
| <b>65t<sup>#</sup></b> | -3163.19449  | 53.9 | 18.7  | 16.9          | -3162.46149 | 23.7  |
| <b>38s</b>             | -3163.30720  | 56.8 | -52.0 | -50.9         | -3162.57928 | -50.2 |
| <b>66s</b>             | -3163.16264  | 54.3 | 38.7  | 37.3          | -3162.43769 | 38.6  |
| <b>66t</b>             | -3163.15937  | 52.8 | 40.7  | 37.8          | -3162.43171 | 42.4  |

#### 2.4.4 Zusammenfassung

Anhand der DFT-Rechnungen konnte ein plausibler Reaktionsmechanismus für die Bildung der polycyclischen Käfigverbindung **41** aufgestellt werden, der von (1,3-Diphosphet)(1,3,5-triphosphinin)eisen **43s**, dem vermutlichen Primärprodukt der Reaktion von Phosphaalkin mit reaktiven Eisenkomplexen, ausgeht. Dabei wird nach einem Singulett-Triplett-Übergang und nachfolgendem Angriff eines Phosphoratoms des Diphosphetringes an ein Kohlenstoffatom des Triphosphininringes die Zwischenstufe **47t** gebildet, die sich nach Addition eines Phosphaalkinmoleküls unter Bildung einer weiteren P-C-Bindung zwischen den Ringen zur Zwischenstufe **53t** umlagert. Nach Addition eines weiteren Moleküls Phosphaalkin kommt es unter schrittweiser Bildung zweier P-C-Bindungen zur Cyclodimerisierung der  $\pi$ -gebundenen Phosphaalkinmoleküle, bei der die Zwischenstufe **60s** gebildet wird. In dieser existiert bereits eine partielle dritte P-C-Bindung zwischen den Ringen. Die Zwischenstufe **60s** lagert sich nach einem Singulett-Triplett-Übergang schließlich unter Bildung einer P-C-Bindung zwischen einem Kohlenstoffatom des neu gebildeten Diphosphetringes und einem Phosphoratom des Phosphor-Kohlenstoff-Käfigs zum Produkt **41t** um, wobei die partielle P-C-Bindung im Käfig vervollständigt wird.



Die Bildung von Pentaphosphaferrocen **38s**, ausgehend von **43s**, konnte dagegen noch nicht vollständig aufgeklärt werden. Hier wurden jedoch einige potentielle Zwischenstufen identifiziert. So könnte analog zum oben genannten Reaktionsmechanismus nach einem Singulett-Triplett-Übergang und nachfolgendem Angriff eines Phosphoratoms des Diphosphetringes an ein Kohlenstoffatom des Triphosphininringes die Zwischenstufe **47t** gebildet werden. Die Bildung einer P-P-Bindung im Triphosphininring, unter Verschiebung des Eisenatoms und Bildung der Triplett-Struktur **63t**, könnte der nächste Schritt im Reaktionsmechanismus sein. Die damit assoziierte Aktivierungsbarriere ist jedoch mit 17.9 (B3LYP) bzw. 18.9 kcal·mol<sup>-1</sup> (B3LYP\*) relativ hoch, so dass noch gewisse Zweifel an diesem Reaktionsschritt bleiben. Nach einigen Reaktionsschritten, die noch nicht aufgeklärt werden konnten, könnte schließlich die Struktur **64t** gebildet werden, bei der ein bicyclisches Ringsystem mit einem Vier- und einem Dreiring  $\eta^2$  über eine P-C-Doppelbindung und  $\eta^1$  über ein Kohlenstoffatom ans Eisen gebunden ist. Aus diesem könnte schließlich unter Spaltung der P-C-Bindung im Bicyclus und einem Triplett-Singulett-Übergang das Produkt **38s** gebildet werden.

In zukünftigen Rechnungen sollte versucht werden, den Reaktionsmechanismus für die Bildung von **38s** vollständig aufzuklären. Zudem wäre der Einfluss der Reste am Phosphaalkin sowie der Einfluss des Zentralmetalls zu untersuchen. Außerdem könnte ein Vergleich zwischen der isolierbaren und robusten Verbindung (1,3-Diphosphinin)(1,3-diphosphet)eisen mit **43s** neues Licht auf die Konsequenzen des Ersatzes von CR-Fragmenten durch Phosphoratome werfen. Dieser dramatische Reaktivitätsunterschied bei einer derart kleinen Änderung im Sechsringliganden ist bislang nicht nachzuvollziehen.

## 2.5 Hexaphosphamanganocen

### 2.5.1 Einleitung

Einige der bekanntesten Beispiele metallorganischer Verbindungen sind  $\pi$ -Komplexe ungesättigter Carbacyclen. Seit der Entdeckung des Ferrocens 1951<sup>118</sup> wurde auf diesem Gebiet eine sehr große Zahl neuer Verbindungen synthetisiert, oft mit der Zielsetzung, neue oder bessere Katalysatoren für technische Zwecke zu entwickeln.

Eine Möglichkeit, die Eigenschaften solcher Verbindungen wesentlich zu verändern, ist der Austausch eines oder mehrerer  $sp^2$ -C-R-Fragmente gegen isolobale Phosphoratome. So unterscheidet sich der *low-spin*-Komplex [Bis $\{\eta^5$ -3,5-di(*tert*-butyl)-1,2,4-triphosphacyclopentadienyl $\}$ mangan] **55** in seinen spektroskopischen Eigenschaften stark von Manganocenderivaten mit rein carbacyclischen Liganden, wie z. B. Decamethylmanganocen.<sup>119</sup> Die ESR-Spektren von **67** sind sehr viel besser aufgelöst und zeigen Charakteristika axialsymmetrischer  $g$ - und  $a(^{55}\text{Mn})$ -Hyperfeintensoren, die auf einen nicht entarteten Grundzustand  $^2A$  mit einer geringen Spin-Bahn-Kopplung hindeuten. Obwohl eine exakte Axialsymmetrie für das SOMO von **67** aufgrund der Symmetrie der Verbindung auszuschließen ist, wird experimentell keine Aufspaltung der Tensorkomponenten  $g_{\square}$ - und  $A_{\square}(^{55}\text{Mn})$  beobachtet und es fehlt die denkbare Hyperfeinstruktur der Phosphor- und Wasserstoffkerne. Dies deutet auf eine metallzentrierte Spindichte mit einem geringen Ligandanteil hin.<sup>120</sup>

Um die elektronische Struktur von **67** näher zu charakterisieren, wurden im Folgenden die Struktur und Spindichteverteilung mittels Dichtefunktionaltheorie berechnet. Zusätzlich wurden die ESR-Hyperfeinkopplungskonstanten berechnet und mit den experimentellen Werten verglichen.

### 2.5.2 Rechenmethoden

Alle Berechnungen wurden mit dem in Gaussian98<sup>88</sup> implementierten B3LYP drei Parameter Hybrid-Dichtefunktional<sup>25,23</sup> durchgeführt. Für die Optimierungen und anschließenden Frequenzrechnungen wurde der Schäfer-Horn-Ahlrichs *split valence* Basissatz<sup>99</sup> (SHAsv) verwendet. Um eine genauere Beschreibung der elektronischen Struktur zur Berechnung der ESR-Kopplungskonstanten zu erhalten, wurden zudem *single point* Rechnungen mit dem Schäfer-Horn-Ahlrichs *triple zeta* Basissatz<sup>99</sup> (SHAtz) auf die optimierten Strukturen

durchgeführt. Beide Basissätze wurden um jeweils einen Satz  $d$ -Funktionen mit Exponenten von 0.6 und 0.34 auf C und P und  $p$ - und  $f$ -Funktionen mit Exponenten von 0.092 und 0.96 auf Mn erweitert (SHAsvp bzw. SHAtzp).<sup>100</sup>

### 2.5.3 Berechnung der Hyperfeinkopplungskonstanten

Die Formeln zur Berechnung der Hyperfeinkopplungskonstanten<sup>121</sup> werden aus dem Spin-Hamiltonian erhalten:

$$\hat{H}_{\text{spin}} = -g_e \mu_B \mathbf{B} \cdot \mathbf{S} - g_N \mu_N \mathbf{B} \cdot \mathbf{I}_N - \mathbf{S} \cdot \mathbf{T} \cdot \mathbf{I}_N \quad (1)$$

Die ersten beiden Terme beschreiben dabei die Wechselwirkung zwischen den ungepaarten Elektronen  $\mathbf{S}$  und einem magnetischen Feld  $\mathbf{B}$  bzw. zwischen den magnetischen Kernen  $\mathbf{I}_N$  und dem magnetischen Feld  $\mathbf{B}$  und werden als elektronische und Kern-Zeeman-Terme bezeichnet. Der letzte Term in Gleichung (32) ist vom äußeren Feld unabhängig und beschreibt die magnetische Hyperfein-Wechselwirkung zwischen den magnetischen Momenten der ungepaarten Elektronen  $\mathbf{S}$  und der Kerne  $\mathbf{I}_N$ .  $\mu_e$  und  $\mu_N$  sind dabei die Elektron- und Kern-Magnetone und  $g_e$  und  $g_N$  die magnetogyrischen Verhältnisse der Elektronen und Kerne.

Der  $3 \times 3$  Hyperfeinwechselwirkungstensor  $\mathbf{T}$  kann in seinen isotropen (sphärisch symmetrischen) und seine anisotropen (dipolaren) Anteile aufgespalten werden. Die isotrope Hyperfeinkopplungskonstante  $A_{\text{iso}}(N)$  ist dabei über Gleichung (33) mit der Spindichte am Kernort  $\mathbf{r}_N$  verknüpft.

$$A_{\text{iso}}(N) \equiv \frac{1}{3} \text{Tr}\{\mathbf{T}\} = \frac{8}{3} \frac{g_e}{g_0} g_N \mu_N \sum_{\alpha\beta} P_{\alpha\beta}^{a-b} \mu_{\alpha} \mu_{\beta} \mathbf{d}(\mathbf{r}_N) \quad (2)$$

Da dieser Wert nur von der Spindichte am Kernort abhängt, wird er häufig als Kontaktwechselwirkung oder Fermikontaktterm bezeichnet. Die anisotropen Komponenten des Hyperfeinwechselwirkungstensors  $\mathbf{T}$  leiten sich von der klassischen Formel interagierender Dipole ab:

$$T_{ij}(N) \equiv \frac{g_e}{g_0} g_N \mu_N \sum_{\alpha\beta} P_{\alpha\beta}^{a-b} \mu_{\alpha} \mu_{\beta} \left[ \frac{r_{\text{KN}i}^{-5} r_{\text{KN}j}^2}{r_{\text{KN}}^2} \delta_{ij} - 3 \frac{r_{\text{KN}i} r_{\text{KN}j}}{r_{\text{KN}}^3} \right] \quad (3)$$

wobei  $P_{\alpha\beta}^{a-b}$  ein Element der Spindichtematrix ist.

Die Komponenten des Hyperfeintensors  $\mathbf{A}$ , wie in ESR-Spektren beobachtet, erhält man durch Addition von  $A_{\text{iso}}$  zu den  $T_{xx}$ -,  $T_{yy}$ - und  $T_{zz}$ -Komponenten des dipolaren Tensors.

Für Moleküle mit einer wohldefinierten Axialsymmetrie ist es üblich, nur einen Wert des dipolaren Hyperfeintensors anzugeben, der sich von der höchsten dipolaren Komponente wie folgt ableitet:

$$A_{dip} = \frac{1}{2} T_{zz} \quad (4)$$

Es ist ebenfalls üblich, die Werte senkrecht und parallel zur Symmetrieachse zu berechnen:

$$\begin{aligned} A_{\square} &= A_{iso} \square T_{zz} \\ A_{\square} &= A_{iso} \square \frac{1}{2} \square T_{xx} \square T_{yy} \square \end{aligned} \quad (5)$$

### 2.5.4 Ergebnisse

Ausgehend von der Kristallstruktur von **67** wurden zwei C<sub>2</sub>-symmetrische Minima in unterschiedlichen elektronischen Zuständen erhalten: zum einen der aufgrund der ESR-Spektren erwartete Zustand <sup>2</sup>A (**67a**) und zum anderen ein um 0.6 kcal·mol<sup>-1</sup> weniger stabiler Zustand <sup>2</sup>B (**67b**). Mit Korrektur für die Nullpunktsenergie (*zero-point energy*, ZPE) ergibt sich eine Energiedifferenz von lediglich 0.3 kcal·mol<sup>-1</sup>. Aufgrund dieses geringen Energieunterschiedes ist die energetische Reihenfolge der berechneten Zustände nicht zweifelsfrei zuzuordnen. So haben Reiher, Salomon und Hess z. B. festgestellt, dass die *low spin/high spin* Energiedifferenzen in Fe(II)-Komplexen mit DFT unzureichend wiedergegeben werden.<sup>25</sup> Beide Wellenfunktionen erwiesen sich in entsprechenden Rechnungen<sup>122</sup> als stabil.

Ausgewählte experimentelle<sup>120</sup> und berechnete Bindungslängen von **67** sind in der Tabelle 41 angegeben. Für **67a** (<sup>2</sup>A) sind der Abstand zwischen Zentralmetall und Ringmitten (174 pm) und der Torsionswinkel zwischen den Ringen (81°) besser im Einklang mit den experimentellen Werten (171 pm und 76°) als für **67b** (<sup>2</sup>B; 184 pm und 86°). Dementsprechend ergibt sich bei der Überlagerung der berechneten Strukturen mit der Kristallstruktur mittels VMD 1.2<sup>123</sup> für **67a** eine kleinere Abweichung (*root-mean-square distance*,<sup>124</sup> RMSD) von 21 pm gegenüber 34 pm für **67b**.

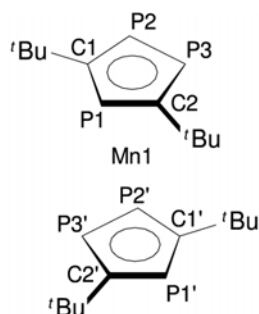

Abbildung 41. [Bis{3,5-di(tert-butyl)-1,2,4-triphenylphosphacyclopentadienyl}mangan] **67**.

Tabelle 18. Experimentelle und berechnete Bindungslängen von **67** in pm.

|       | <b>67 (exp.)</b> | <b>67a (<sup>2</sup>A)<sup>a</sup></b> | <b>67b (<sup>2</sup>B)<sup>a</sup></b> |
|-------|------------------|----------------------------------------|----------------------------------------|
| Mn-P1 | 236.3(2)         | 240.6                                  | 252.1                                  |
| Mn-P2 | 238.70(14)       | 242.8                                  | 244.1                                  |
| Mn-P3 | 239.06(14)       | 243.0                                  | 246.8                                  |
| Mn-C1 | 221.4(5)         | 222.9                                  | 230.1                                  |
| Mn-C2 | 221.9(5)         | 227.4                                  | 239.3                                  |
| P1-C1 | 176.9(5)         | 179.0                                  | 177.6                                  |
| P1-C2 | 176.2(6)         | 178.6                                  | 177.0                                  |
| P2-C1 | 177.9(5)         | 179.8                                  | 178.8                                  |
| P3-C2 | 177.4(5)         | 179.2                                  | 178.5                                  |
| P2-P3 | 213.1(2)         | 217.2                                  | 217.9                                  |

<sup>a</sup> UB3LYP/SHAsvp

Die berechneten Spindichteverteilungen für beide möglichen Grundzustände von **67** sind in Abbildung 100 dargestellt.<sup>91</sup> Beide sind eindeutig metallzentriert. Im Falle des Zustands <sup>2</sup>A (**67a**) entspricht die äußere Form der Spindichteverteilung im Wesentlichen einem d<sub>z<sup>2</sup></sub>-Orbital, im <sup>2</sup>B-Zustand (**67b**) dagegen einem d<sub>xy</sub>- oder d<sub>z<sup>2</sup>-y<sup>2</sup></sub>-Orbital.

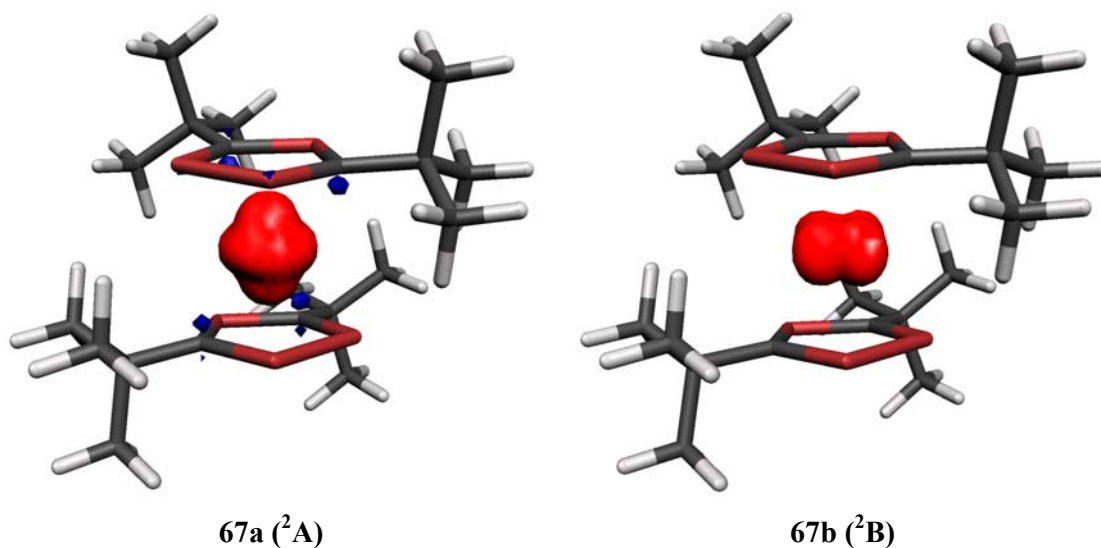

**Abbildung 42.** Berechnete Spindichteverteilung von **67a** (links) und **67b** (rechts). Isodichteflächen bei  $0.01 e^{-}\cdot\text{bohr}^{-3}$ .

**Tabelle 19.** Isotrope und anisotrope Hyperfeinkopplungskonstanten von **67** [G].

|                                     | <b>67 (exp.)</b> | <b>67a (<sup>2</sup>A)<sup>a</sup></b> | <b>67b (<sup>2</sup>B)<sup>a</sup></b> |
|-------------------------------------|------------------|----------------------------------------|----------------------------------------|
| $\langle a(^{55}\text{Mn}) \rangle$ | $78.9 \pm 3.6$   | -63.2                                  | -44.8                                  |
| $A_{zz}$                            | nicht aufgelöst  | 6.0                                    | -133.7                                 |
| $A_{xx}$                            | $115.7 \pm 5.1$  | -92.9                                  | -0.8                                   |
| $A_{yy}$                            | $115.7 \pm 5.1$  | -102.7                                 | 0.1                                    |

<sup>a</sup> UB3LYP/SHAtzp//UB3LYP/SHAsvp.

In Tabelle 42 sind die für **67a** und **67b** berechneten isotropen und anisotropen <sup>55</sup>Mn-Hyperfeinkopplungskonstanten<sup>121</sup> den experimentellen Werten<sup>120</sup> gegenübergestellt. Bei Würdigung der experimentellen Fehlergrenzen und der zu erwartenden Genauigkeit der theoretischen Werte ergibt sich eine gute Übereinstimmung zwischen den berechneten Kopplungskonstanten des Zustandes <sup>2</sup>A mit den experimentellen Werten, obwohl die Abweichungen von der Axialsymmetrie bei den berechneten Werten überbetont werden und größer sind, als es die maximalen Fehler der experimentellen Spektren zulassen. Der Zustand <sup>2</sup>B weist dagegen eine deutlich kleinere Kopplungskonstante  $\langle a(^{55}\text{Mn}) \rangle$  und ein im Vergleich zu den experimentellen Werten invertiertes Aufspaltungsmuster auf, wie es auch

experimentell für Decamethylmanganocen, das einen dem  ${}^2B$  entsprechenden Zustand  ${}^2E_{2g}$  aufweist, gefunden wurde (Abbildung 101).<sup>125</sup>

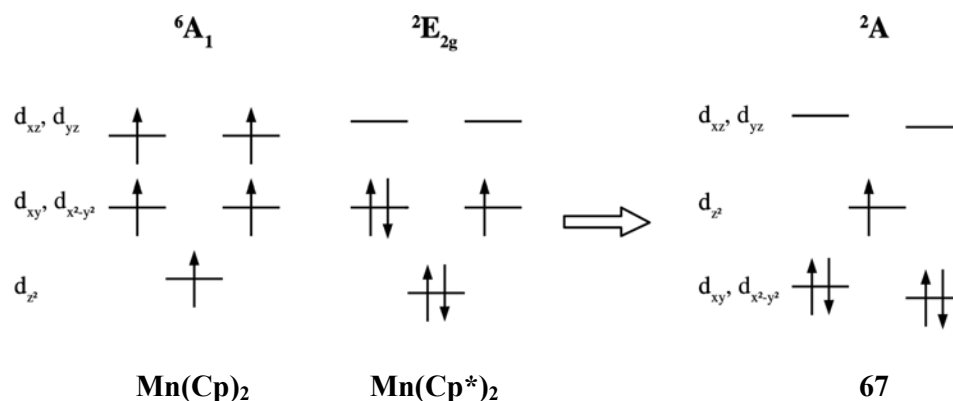

**Abbildung 43.** Schematische Darstellung der Grenzorbitale rein carbocyclischer Manganocene, high spin Manganocen (links) und low spin Decamethylmanganocen (Mitte), im Vergleich zum Hexaphosphamanganocen **67** (rechts).

### 2.5.5 Zusammenfassung

Die Einführung von sechs Phosphoratomen in das Manganocengerüst in der Form von [Bis{3,5-di(*tert*-butyl)-1,2,4-triphosphacyclopentadienyl}mangan] **67** führt zu einem bei Manganocenderivaten bislang noch nicht beobachteten elektronischen Grundzustand  ${}^2A$ . Der Einbau von jeweils drei Phosphoratomen in die Cyclopentadienylliganden bewirkt demnach bei Manganocenderivaten eine veränderte Reihenfolge der Grenzorbitale. Die Eigenschaften von Hexaphosphamanganocen **67** sind folglich nicht mehr aus einfachen P-C-Analogiebetrachtungen abzuleiten.

Um die hier beobachtete Umkehr der Reihenfolge der Grenzorbitale zu erklären, können mehrere mögliche Ursachen herangezogen werden. Cp- und Triphosphollyliganden unterscheiden sich prinzipiell durch die freien Elektronenpaare der Phosphoratome, die grundsätzlich mit dem Zentralmetall wechselwirken könnten. Rechnungen zu diesem Punkt brachten jedoch keine Hinweise auf eine signifikante Wechselwirkung mit den d-Orbitalen des Mangans. So ergab sich aus der *natural bond orbital* (NBO)<sup>126</sup> und der *natural localized molecular orbital* (NLMO)<sup>126</sup> Analyse keine signifikante Wechselwirkung zwischen den freien Elektronenpaaren der Phosphoratome und den *d*-Orbitalen des Manganzentrums.

Andererseits bewirkt schon alleine die Größe des Phosphors im Vergleich zum Kohlenstoff merkliche Veränderungen der Eigenschaften des Fünfringes. Neben der Ausdehnung der  $p$ -Orbitale des Phosphors ist hier vor allem die Vergrößerung des Ringdurchmessers zu nennen. Diese beiden Effekte sind in der Lage, die Wechselwirkung der  $d$ -Orbitale des Metalls und der Ligandorbitale merklich zu verändern, und so direkten Einfluss auf die Grenzorbitale zu nehmen.

Neuere Untersuchungen von Nixon *et al.*<sup>127</sup> weisen darauf hin, dass eine erhöhte Metall-Ring-Rückbindung, welche die  $e_2$ -artigen Orbitale am Metall stabilisiert, zu der beobachteten Umkehr der Grenzorbitalreihenfolge führt. Ein Hinweis auf die Ursachen dieser verstärkten Metall-Ring-Rückbindung ergibt sich aus der Arbeit von Frison, Mathey und Sevin,<sup>128</sup> die eine Reihe von Aza- und Phosphoferrocenen mittels *electron localization function* (ELF) auf DFT-Niveau untersucht haben. Sie kommen zu dem Schluss, dass die freien Elektronenpaare in den Aza- und Phosphoferrocenen mehr Elektronendichte aufnehmen können als C-C- oder C-H-Bindungen. In den Azaferrocenen führt dabei die höhere Elektronegativität des Stickstoffs dazu, dass die Elektronendichte näher am Stickstoff konzentriert wird. In den Phosphoferrocenen bieten dagegen die  $3s$  und  $3p$  Orbitale am Phosphor aufgrund ihrer größeren Radien mehr Platz für zusätzliche Elektronen. Der Phosphor zieht somit trotz seiner geringen Elektronegativität Elektronendichte in Raumbereiche ab, die formal mit dem freien Elektronenpaar assoziiert werden. Die Substitution von CH-Gruppen durch N und P führt somit zu einer Abnahme der Donatoreigenschaften der Heterocyclopentadienylringe und zu einer verstärkten Metall-Ring-Rückbindung.



### 3. Literaturverzeichnis

1. A. Szabo, N. S. Ostlund, *Modern Quantum Chemistry*, McGraw Hill Publishing Company, New York, **1989**.
2. a) F. Jensen, *Introduction to Computational Chemistry*, Wiley, Chichester, **1999**; b) T. Clark, *A Handbook of Computational Chemistry*, Wiley, New York, **1985**; c) M. Hartmann, *Computational Approach in the Description of Some Typical Water Exchange Reactions and Related Enzyme Catalysis*, Dissertation, Universität Erlangen-Nürnberg **1998**.
3. A. R. Leach, *Molecular Modelling, Principles and Applications*, Addison Wesley Longman Limited, Essex, **1996**.
4. E. Schrödinger, *Ann. Phys.* **1926**, *79*, 361-376; 489-527.
5. M. Born, J. R. Oppenheimer, *Ann. Phys.* **1927**, *84*, 457-484.
6. W. Pauli, *Z. Physik* **1925**, *31*, 765-783.
7. V. Fock, *Z. Physik* **1930**, *61*, 126-148.
8. a) J. C. Slater, *Phys. Rev.* **1930**, *36*, 57-64; b) S. F. Boys, *Proc. Roy. Soc., London* **1950**, *A200*, 542-554.
9. C. Møller, M. S. Plesset, *Phys. Rev.* **1934**, *46*, 618-622.
10. a) J. Cizek, *Adv. Chem. Phys.* **1969**, *14*, 35-89; b) G. D. Purvis, R. J. Bartlett, *J. Chem. Phys.* **1982**, *76*, 1910-1918.
11. J. A. Pople, M. Head-Gordon, K. Raghavachari, *J. Chem. Phys.* **1987**, *87*, 5968-5975.
12. R. H. Eade, M. A. Robb, *Chem. Phys. Lett.* **1981**, *83*, 362-368.
13. B. O. Roos, P. R. Taylor, P. E. M. Siegbahn, *Chem. Phys.* **1980**, *48*, 157-173.
14. W. Koch, M. C. Holthausen, *A Chemist's Guide to Density Functional Theory*, Wiley-VCH, Weinheim, 2. Auflage, **2000**.
15. P. Hohenberg, W. Kohn, *Phys. Rev. B* **1964**, *136*, 864-871.
16. W. Kohn, L. J. Sham, *Phys. Rev. A* **1965**, *140*, 1133-1138.
17. P. A. M. Dirac, *Proc. Cambridge Phil. Soc.* **1930**, *26*, 376-385.
18. D. M. Ceperley, B. J. Alder, *Phys. Rev. Lett.* **1980**, *45*, 566-569.
19. S. H. Vosko, L. Wilk, M. Nusair, *Can. J. Phys.* **1980**, *58*, 1200-1211.
20. a) U. von Barth, L. Hedin, *J. Phys. C* **1972**, *5*, 1629-1642; b) A. K. Rajagopal, J. Callaway, *Phys. Rev. B* **1973**, *7*, 1912-1919.
21. A. D. Becke, *Phys. Rev. A* **1988**, *38*, 3098-3100.

22. C. Lee, W. Yang, R. G. Parr, *Phys. Rev. B* **1988**, *37*, 785-789.
23. J. P. Perdew, Y. Wang, *Phys. Rev. B* **1992**, *45*, 13244-13249.
24. a) A. D. Becke, *J. Chem. Phys.* **1993**, *98*, 1372-1377, 5648-5652; b) P. J. Stephens, F. J. Devlin, C. F. Chabalowski, M. J. Frisch, *J. Phys. Chem.* **1994**, *98*, 11623-11627.
25. a) M. Reiher, O. Salomon, B. A. Hess, *Theor. Chem. Acc.* **2001**, *107*, 48-55; b) O. Salomon, M. Reiher, B. A. Hess, *J. Chem. Phys.* **2002**, *117*, 4729-4737.
26. a) J. A. Pople, G. A. Segal, *J. Chem. Phys.* **1965**, *43*, 136-149; b) J. A. Pople, G. A. Segal, *J. Chem. Phys.* **1966**, *44*, 3289-3296.
27. J. A. Pople, D. L. Beveridge, P. A. Dobosh, *J. Chem. Phys.* **1967**, *47*, 2026-2033.
28. M. J. S. Dewar, W. Thiel, *J. Am. Chem. Soc.* **1977**, *99*, 4899-4907; 4907-4917.
29. M. J. S. Dewar, E. G. Zoebisch, E. F. Healy, J. J. P. Stewart, *J. Am. Chem. Soc.* **1985**, *107*, 3902-3909.
30. J. J. P. Stewart, *J. Comput. Chem.* **1989**, *10*, 209-220; 221-264.
31. a) W. Thiel, A. A. Voityuk, *J. Phys. Chem.* **1996**, *100*, 616-626; b) W. Thiel, *Adv. Chem. Phys.* **1996**, *93*, 703-757.
32. M. J. S. Dewar, C. Jie, J. Yu, *Tetrahedron*, **1993**, *49*, 5003-5038; 7393.
33. P. v. R. Schleyer, *Chem. Rev.* **2001**, *101*, 1115-1117.
34. M. Faraday, *Phil. Trans. Roy. Soc. London* **1825**, 440-466.
35. a) F. A. Kekulé, *Bull. Soc. Chim. Paris*, **1865**, *3*, 98-111; b) F. A. Kekulé, *Ann.* **1866**, *137*, 129-196.
36. F. A. Kekulé, *Ann.* **1872**, *162*, 77-124.
37. E. Erlenmeyer, *Ann.* **1866**, *137*, 327-359.
38. H. E. Armstrong, *J. Chem. Soc.* **1887**, *51*, 258-268.
39. A. v. Baeyer, *Ann.* **1888**, *245*, 106-185.
40. a) E. Bamberger, *Ann.* **1890**, *257*, 1-55; b) E. Bamberger, *Ber.* **1891**, *24*, 1758-1764; c) E. Bamberger, *Ber.* **1893**, *26*, 1946-1947.
41. J. W. Armit, R. Robinson, *J. Chem. Soc.* **1925**, *127*, 1604-1618.
42. a) E. Hückel, *Z. Phys.* **1931**, *70*, 204-286; b) E. Hückel, *Z. Phys.* **1931**, *72*, 310-337.
43. a) R. Breslow, *Chem. Eng. News.* **1965**, *43*, 90-99; b) R. Breslow, J. Brown, J. J. Gajewski, *J. Am. Chem. Soc.* **1967**, *89*, 4383-4390; c) R. Breslow, *Angew. Chem., Int. Ed. Engl.* **1968**, *7*, 565-570; d) R. Breslow, *Acc. Chem. Res.* **1973**, *6*, 393-398.
44. M. J. S. Dewar, G. J. Gleicher, *J. Am. Chem. Soc.* **1965**, *87*, 685-692.
45. a) B. A. Hess Jr., L. J. Schaad, *J. Am. Chem. Soc.* **1971**, *93*, 305-310. b) L. J. Schaad, B. A. Hess Jr., *J. Am. Chem. Soc.* **1972**, *94*, 3068-3074.

46. a) W. C. Herndon, *J. Am. Chem. Soc.* **1973**, *95*, 2404-2406; b) W. C. Herndon, M. L. Ellzey Jr., *J. Am. Chem. Soc.* **1974**, *96*, 6631-6642.
47. J-i Aihara, *J. Am. Chem. Soc.* **1976**, *98*, 2750-2758.
48. W. J. Hehre, R. Ditchfield, L. Radom, J. A. Pople, *J. Am. Chem. Soc.* **1970**, *92*, 4796-4801.
49. a) P. George, M. Trachtman, C. W. Bock, A. M. Brett, *Tetrahedron* **1976**, *32*, 317-323; b) P. George, M. Trachtman, C. W. Bock, A. M. Brett, *J. Chem. Soc., Perkin Trans. 2* **1976**, 1222-1227; c) P. George, M. Trachtman, C. W. Bock, A. M. Brett, *J. Chem. Soc., Perkin Trans. 2* **1977**, 1036-1047.
50. Haijun Jiao, *Geometric, Energetic and Magnetic Properties of Aromatic and Antiaromatic Systems - A Theoretical Study*, Dissertation Universität Erlangen-Nürnberg 1995.
51. a) S. S. Shaik, P. C. Hiberty, J.-M. Lefour, G. Ohanessian, *J. Am. Chem. Soc.* **1987**, *109*, 363-374; b) P. C. Hiberty, D. Danovich, A. Shurki, S. Shaik, *J. Am. Chem. Soc.* **1995**, *117*, 7760-7768.
52. P. J. Garratt, *Aromaticity*, Wiley Inc., NewYork, **1994**.
53. A. Julg, P. François, *Theor. Chim. Acta* **1967**, *7*, 249-259.
54. a) C. W. Bird, *Tetrahedron* **1985**, *41*, 1409-1414; b) C. W. Bird, *Tetrahedron* **1990**, *46*, 5697-5702; c) C. W. Bird, *Tetrahedron* **1992**, *48*, 335-340; d) C. W. Bird, *Tetrahedron* **1992**, *48*, 1675-1682; e) C. W. Bird, *Tetrahedron* **1993**, *49*, 8441-8448.
55. L. Pauling, G. W. Wheland, *J. Chem. Phys.* **1936**, *4*, 673-677.
56. F. Sondheimer, *Acc. Chem. Res.* **1972**, *5*, 81-91.
57. J. A. Pople, *J. Chem. Phys.* **1956**, *24*, 1111.
58. a) R. C. Benson, W. H. Flygare, *J. Am. Chem. Soc.* **1970**, *92*, 7523-7529; b) T. G. Schmalz, C. L. Norris, W. H. Flygare, *J. Am. Chem. Soc.* **1973**, *95*, 7961-7967; c) J. R. Davidson, A. K. Burnham, B. Siegel, P. Beak, W. H. Flygare, *J. Am. Chem. Soc.* **1974**, *96*, 7394-7396.
59. M. P. Pascal, *Ann. Chim. Phys.* **1910**, *19*, 5-69.
60. H. J. Dauben Jr., J. D. Wilson, J. L. Laity, *J. Am. Chem. Soc.* **1969**, *91*, 1991-1998.
61. a) P. v. R. Schleyer, C. Maerker, A. Dransfeld, H. Jiao, N. J. R. van Eikema Hommes, *J. Am. Chem. Soc.* **1996**, *118*, 6317-6318; b) P. v. R. Schleyer, H. Jiao, N. J. R. van Eikema Hommes, V. G. Malkin, O. L. Malkina, *J. Am. Chem. Soc.* **1997**, *119*, 12669-12670; c) P. v. R. Schleyer, M. Manoharan, Z.-X. Wang, B. Kiran, H. Jiao, R. Puchta, N. J. R. van Eikema Hommes, *Org. Lett.* **2001**, *3*, 2465-2468; d) P. v. R. Schleyer, B.

- Kiran, D. V. Simion, T. S. Sorensen, *J. Am. Chem. Soc.* **2000**, *112*, 510-513.
62. a) K. B. Wiberg, *Chem. Rev.* **2001**, *101*, 1317-1331; b) A. D. Allen, T. T. Tidwell, *Chem. Rev.* **2001**, *101*, 1333-1348.
63. A. R. Katritzky, K. Jug, D. C. Oniciu, *Chem. Rev.* **2001**, *101*, 1421-1449.
64. R. V. Williams, *Chem. Rev.* **2001**, *101*, 1185-1204.
65. a) J. L. von Rosenberg Jr., J. E. Mahler, R. Pettit, *J. Am. Chem. Soc.* **1962**, *84*, 2842-2843; b) R. F. Childs, *Acc. Chem. Res.* **1984**, *17*, 347-352.
66. a) J. Chandrasekhar, E. D. Jemmis, P. v. R. Schleyer, *Tetrahedron Lett.* **1979**, *20*, 3707-3710; b) A. B. McEwen, P. v. R. Schleyer, *J. Org. Chem.* **1986**, *51*, 4357-4368; c) P. v. R. Schleyer, H. Jiao, M. N. Glukhovtsev, J. Chandrasekhar, E. Kraka, *J. Am. Chem. Soc.* **1994**, *116*, 10129-10134.
67. R. B. King, *Chem. Rev.* **2001**, *101*, 1119-1152.
68. J.-i. Aihara, *J. Am. Chem. Soc.* **1978**, *110*, 3339-3342.
69. E. D. Jemmis, P. v. R. Schleyer, *J. Am. Chem. Soc.* **1982**, *104*, 4781-4788.
70. M. Bühl, A. Hirsch, *Chem. Rev.* **2001**, *101*, 1153-1183.
71. D. Cremer, *Tetrahedron* **1988**, *44*, 7427-7454.
72. a) A. Göller, H. Heydt, T. Clark, *J. Org. Chem.* **1996**, *61*, 5840-5846; b) H. Heydt, M. Ehle, S. Haber, J. Hoffmann, O. Wagner, A. Göller, T. Clark, M. Regitz, *Chem. Ber.* **1997**, *130*, 711-723; c) H. Heydt, J. Hoffmann, A. Göller, T. Clark, M. Regitz, *Synthesis* **1998**, 175-180; d) A. Göller, T. Clark, *J. Mol. Model.* **2000**, *6*, 133-149.
73. A. Göller, *Problemangepaßte quantenchemische Berechnungen zu Cytochrom P 450 - Metabolismus und  $\sigma^*$ -Aromatizität*, Dissertation, Universität Erlangen-Nürnberg **1997**.
74. J. Schamberger, *Quantenmechanische Studien zur  $\sigma^*$ -Aromatizität und der Bildung von Metallkomplexen der quartären Guanin-DNA*, Dissertation, Universität Erlangen-Nürnberg **1999**.
75. S. Winstein, *J. Am. Chem. Soc.* **1959**, *81*, 6524-6525.
76. S. Winstein, J. Sonnenberg, L. deVries, *J. Am. Chem. Soc.* **1959**, *81*, 6523-6524.
77. D. E. Applequist, J. D. Roberts, *J. Am. Chem. Soc.* **1956**, *78*, 4012-4022.
78. W. v. E. Doering, G. Laber, R. Vonderwahl, N. F. Chamberlain, R. B. Williams, *J. Am. Chem. Soc.* **1956**, *78*, 5448.
79. W. G. Woods, R. A. Carboni, J. D. Roberts, *J. Am. Chem. Soc.* **1956**, *78*, 5653-5657.
80. a) J. B. Grutzner, W. L. Jorgensen, *J. Am. Chem. Soc.* **1981**, *103*, 1372-1375; b) E. Kaufmann, H. Mayr, J. Chandrasekhar, P. v. R. Schleyer, *J. Am. Chem. Soc.* **1981**, *103*, 1375-1380.

81. T. Nishinaga, Y. Izukawa, K. Komatsu, *J. Phys. Org. Chem.* **1998**, *11*, 475-477.
82. a) J. B. Conn, G. B. Kistiakowski, E. A. Smith, *J. Am. Chem. Soc.* **1939**, *61*, 1868-1876; b) R. B. Turner, W. R. Meador, W. v. E. Doering, L. H. Knox, J. R. Mayer, D. W. Wiley, *J. Am. Chem. Soc.* **1957**, *79*, 4127-4133.
83. a) H. J. Dauben Jr., J. D. Wilson, J. L. Laity, *J. Am. Chem. Soc.* **1968**, *90*, 811-813; b) H. J. Dauben Jr., J. D. Wilson, J. L. Laity, *J. Am. Chem. Soc.* **1969**, *91*, 1991-1998.
84. a) M. J. S. Dewar, *Bull. Soc. Chim. Belg.* **1979**, *88*, 957-967; b) M. J. S. Dewar, M. L. McKee, *Pure Appl. Chem.* **1980**, *52*, 1431-1441; c) M. J. S. Dewar, *J. Am. Chem. Soc.* **1984**, *106*, 669-682.
85. M. J. S. Dewar, R. Pettit, *J. Chem. Soc.* **1954**, 1625-1634.
86. D. Cremer, J. Gauss, *J. Am. Chem. Soc.* **1986**, *108*, 7467-7477.
87. a) D. Cremer, E. Kraka, *J. Am. Chem. Soc.* **1985**, *107*, 3800-3810; b) R. F. W. Bader, T. S. Slee, D. Cremer, E. Kraka, *J. Am. Chem. Soc.* **1983**, *105*, 5061-5068.
88. *Gaussian 98, Revision A.7*, M. J. Frisch, G. W. Trucks, H. B. Schlegel, G. E. Scuseria, M. A. Robb, J. R. Cheeseman, V. G. Zakrzewski, J. A. Montgomery, Jr., R. E. Stratmann, J. C. Burant, S. Dapprich, J. M. Millam, A. D. Daniels, K. N. Kudin, M. C. Strain, O. Farkas, J. Tomasi, V. Barone, M. Cossi, R. Cammi, B. Mennucci, C. Pomelli, C. Adamo, S. Clifford, J. Ochterski, G. A. Petersson, P. Y. Ayala, Q. Cui, K. Morokuma, D. K. Malick, A. D. Rabuck, K. Raghavachari, J. B. Foresman, J. Cioslowski, J. V. Ortiz, A. G. Baboul, B. B. Stefanov, G. Liu, A. Liashenko, P. Piskorz, I. Komaromi, R. Gomperts, R. L. Martin, D. J. Fox, T. Keith, M. A. Al-Laham, C. Y. Peng, A. Nanayakkara, C. Gonzalez, M. Challacombe, P. M. W. Gill, B. Johnson, W. Chen, M. W. Wong, J. L. Andres, C. Gonzalez, M. Head-Gordon, E. S. Replogle, and J. A. Pople, Gaussian, Inc., Pittsburgh PA, 1998.
89. a) A. D. McLean, G. S. Chandler, *J. Chem. Phys.* **1980**, *72*, 5639-5648; b) R. Krishnan, J. S. Binkley, R. Seeger, J. A. Pople, *J. Chem. Phys.* **1980**, *72*, 650-654.
90. M. Hennemann, B. Martin, J. Schamberger, A. Göller, P. v. R. Schleyer, T. Clark, *Manuskript in Vorbereitung*.
91. Die Visualisierung wurde mit *MOLEKEL 4.3* durchgeführt: a) *MOLEKEL 4.3*, P. Flükiger, H. P. Lüthi, S. Portmann, J. Weber, Swiss Center for Scientific Computing: Manno, Switzerland, **2002**; b) P. F. Flükiger, *Development of the molecular graphics package MOLEKEL and its application to selected problems in organic and organometallic chemistry*, Thèse No 2561, Département de chimie physique, Université de Genève, Genève, **1992**; c) S. Portmann, H. P. Lüthi., *CHIMIA* **2000**, *54*, 766-770.

92. F. Mathey, *Angew. Chem.* **2003**, *115*, 1616-1643.
93. J. Waluk, H.-P. Klein, A. J. Ashe III, J. Michl, *Organometallics* **1989**, *8*, 2804-2808.
94. W. W. Schoeller, *J. Chem. Soc. Chem. Commun.* **1985**, 334-335.
95. a) P. B. Hitchcock, M. J. Maah, J. F. Nixon, J. A. Zora, G. J. Leigh, M. A. Bakar, *Angew. Chem.* **1987**, *99*, 497-498; b) R. B. Bedford, A. F. Hill, J. D. E. T. Wilton-Ely, M. D. Francis, C. Jones, *Inorg. Chem.* **1997**, *36*, 5142-5144.
96. a) P. B. Hitchcock, M. J. Maah, J. F. Nixon, *J. Chem. Soc. Chem. Commun.* **1986**, 737-738; b) P. Binger, R. Milczarek, R. Mynott, M. Regitz, W. Rösch, *Angew. Chem.* **1986**, *98*, 645-646.
97. P. Binger, G. Glaser, S. Albus, C. Krüger, *Chem. Ber.* **1995**, *128*, 1261-1265.
98. S. Creve, M. T. Nguyen, L. G. Vanquickenborne, *Eur. J. Inorg. Chem.* **1999**, 1281-1289.
99. A. Schäfer, H. Horn, R. Ahlrichs, *J. Chem. Phys.* **1992**, *97*, 2571-2577.
100. a) S. Huzinaga, *Gaussian Basis Sets for Molecular Calculations*, Elsevier, Amsterdam, **1984**. b) K. Raghavachari, G. W. Trucks, *J. Chem. Phys.* **1989**, *91*, 1062-1065.
101. P. Binger, R. Milczarek, R. Mynott, C. Krüger, Y.-H. Tsay, E. Raabe, M. Regitz, *Chem. Ber.* **1987**, *121*, 637.
102. F. G. N. Cloke, K. R. Flower, P. B. Hitchcock, J. F. Nixon, *J. Chem. Soc. Chem. Commun.* **1994**, 489-490.
103. C. Topf, T. Clark, F. W. Heinemann, M. Hennemann, S. Kummer, H. Pritzkow, U. Zenneck, *Angew. Chem.* **2002**, *114*, 4221-4226; *Angew. Chem. Int. Ed.* **2002**, *41*, 4047-4052.
104. T. H. Dunning Jr., P. J. Hay, *Modern Theoretical Chemistry*, Vol. 3 (Ed.: H. F. Schaefer, III), Plenum, New York, **1976**.
105. a) P. J. Hay, W. R. Wadt, *J. Chem. Phys.* **1985**, *82*, 270-283; b) W. R. Wadt and P. J. Hay, *J. Chem. Phys.* **1985**, *82*, 284-298; c) P. J. Hay, W. R. Wadt, *J. Chem. Phys.* **1985**, *82*, 299-310.
106. a) K. Wolinski, J. F. Hilton, P. Pulay, *J. Am. Chem. Soc.* **1990**, *112*, 8251-8260; b) R. Ditchfield, *Mol. Phys.* **1974**, *27*, 789-807; c) R. McWeeny, *Phys. Rev.* **1962**, *126*, 1028-1034; d) F. London, *J. Phys. Radium, Paris* **1937**, *8*, 397-409.
107. K. B. Wiberg, *Tetrahedron* **1968**, *24*, 1083-1096.
108. A. Dransfeld, *Anwendung von ab initio Methoden zur Untersuchung der Bindungsverhältnisse und der NMR-chemischen Verschiebungen in Molekülen mit drei Substituenten am Phosphor*, Dissertation, Erlangen **1998**.

109. A. E. Reed, R. B. Weinstock, F. Weinhold, *J. Chem. Phys.* **1985**, *83*, 735-746.
110. U. Zenneck, *Angew. Chem.* **1990**, *102*, 171-182.
111. M. Drieß, D. Hu, H. Pritzkow, H. Schäufele, U. Zenneck, *J. Organomet. Chem.* **1987**, *334*, C35-C38.
112. R. Bartsch, P. B. Hitchcock, J. F. Nixon, *J. Chem. Soc. Chem. Commun.* **1987**, 1146-1148.
113. a) A. G. Avent, F. G. N. Cloke, K. R. Flower, P. B. Hitchcock, J. F. Nixon, D. M. Vickers, *Angew. Chem.* **1994**, *106*, 2406-2408; b) F. G. N. Cloke, K. R. Flower, P. B. Hitchcock, J. F. Nixon, *J. Chem. Soc. Chem. Commun.* **1995**, 1659-1660.
114. P. Binger, G. Glaser, *J. Organomet. Chem.* **1994**, *479*, C28-C29.
115. D. Hu, H. Schäufele, H. Pritzkow, U. Zenneck, *Angew. Chem.* **1989**, *101*, 929-931.
116. D. Böhm, F. Knoch, S. Kummer, U. Schmidt, U. Zenneck, *Angew. Chem.* **1995**, *107*, 251-254.
117. P. Binger, S. Leininger, J. Stannek, B. Gabor, R. Mynott, J. Bruckmann, C. Krüger, *Angew. Chem.* **1995**, 2411-2414.
118. a) T. J. Kealy, P. L. Pauson, *Nature* **1951**, *168*, 1039-1040; b) S. A. Miller, J. A. Tebboth, J. F. Tremaine, *J. Chem. Soc.* **1952**, 632-635.
119. a) J. L. Robbins, N. M. Edelstein, S. R. Cooper, J. C. Smart, *J. Am. Chem. Soc.* **1979**, *101*, 3853-3857; b) D. P. Freyberg, J. L. Robbins, K. N. Raymond, J. C. Smart, *J. Am. Chem. Soc.* **1979**, *101*, 892-897; c) L. Fernholt, A. Haaland, R. Seip, J. L. Robbins, J. C. Smart, *J. Organomet. Chem.* **1980**, *194*, 351-355.
120. T. Clark, A. Elvers, F. W. Heinemann, M. Hennemann, M. Zeller, U. Zenneck, *Angew. Chem.* **2000**, *112*, 2174-2178; *Angew. Chem., Int. Ed. Engl.* **2000**, *39*, 2087-2091.
121. a) V. Barone, *J. Phys. Chem.* **1995**, *99*, 11659-11666; b) N. Rega, M. Cossi, V. Barone, *J. Chem. Phys.* **1996**, *105*, 11060-11067; c) V. Barone, *Chem. Phys. Lett.* **1996**, *262*, 201-206.
122. a) R. Seeger, J. A. Pople, *J. Chem. Phys.* **1977**, *66*, 3045-3050; b) R. Bauernschmitt, R. Ahlrichs, *J. Chem. Phys.* **1996**, *104*, 9047-9052.
123. a) A. Dalke, W. Humphrey, S. Izrail, J. Stone, J. Ulrich, VMD für IRIX5, Version 1.2, **1998**; b) W. Humphrey, A. Dalke, K. Schulten, *J. Mol. Graphics* **1996**, *14*, 33-38.
124. A. R. Leach, *Molecular Modelling*, Addison Wesley Longman Ltd., Essex, **1996**, S. 445.
125. a) J. L. Robbins, N. M. Edelstein, S. R. Cooper, J. C. Smart, *J. Am. Chem. Soc.* **1979**, *101*, 3853-3857; b) J. H. Ammeter, *J. Magn. Reson.* **1978**, *30*, 299-325.

126. a) J. E. Carpenter, F. Weinhold, *J. Mol. Strukt. (Theochem)* **1988**, *169*, 41-62; b) J. P. Foster, F. Weinhold, *J. Am. Chem. Soc.* **1980**, *102*, 7211-7218; c) A. E. Reed, F. Weinhold, *J. Chem. Phys.* **1983**, *78*, 4066-4073; d) A. E. Reed, F. Weinhold, *J. Chem. Phys.* **1985**, *83*, 1736-1740; e) A. E. Reed, R. B. Weinstock, F. Weinhold, *J. Chem. Phys.* **1985**, *83*, 735-746; f) A. E. Reed, L. A. Curtiss, F. Weinhold, *Chem. Rev.* **1988**, *88*, 899-926.
127. M. Al-Ktaifani, J. C. Green, P. B. Hitchcock, J. F. Nixon, *J. Chem. Soc., Dalton Trans.* **2001**, 1726 -1731.
128. G. Frison, F. Mathey, A. Sevin, *J. Phys. Chem. A* **2002**, *106*, 5653-5659.
129. a) G. Golub, H. Cohen, P. Paoletti, A. Bencini, L. Messori, I. Bertini, D. Meyerstein, *J. Am. Chem. Soc.* **1995**, *117*, 8353-8361; b) N. Navon, H. Cohen, P. Paoletti, B. Valtancoli, A. Bencini, D. Meyerstein, *Ind. Eng. Chem. Res.* **2000**, *39*, 3536-3540; c) N. Jubran, H. Cohen, Y. Koresh, D. Meyerstein, *J. Chem. Soc. Chem. Comm.* **1984**, 1683-1684.
130. a) F. Wagner, E. K. Barefield, *Inorg. Chem.* **1976**, *15*, 408-417; b) N. Jubran, G. Ginzburg, H. Cohen, Y. Koresh, D. Meyerstein, *Inorg. Chem.* **1985**, *24*, 251-258; c) I. Zilbermann, M. Winnik, D. Sagiv, A. Rotman, H. Cohan, D. Meyerstein, *Inorg. Chim. Acta* **1995**, *240*, 503-514.
131. G. Reid, M. Schroeder, *Chem. Soc. Rev.* **1990**, *19*, 239-269.
132. D. Guldi, F. Wasgestian, D. Meyerstein, *Inorg. Chim. Acta* **1992**, *194*, 15-22.
133. I. Bertini, L. Messori, G. Golub, H. Cohen, D. Meyerstein, *Inorg. Chim. Acta* **1995**, *235*, 5-8.
134. C. M. Che, K. Y. Wong, C. K. Poon, *Inorg. Chem.* **1986**, *25*, 1809-1813.
135. a) G. Golub, I. Zilbermann, H. Cohen, D. Meyerstein, *Supramolecular Chem.* **1996**, *6*, 275-279; b) D. Meyerstein, *Coord. Chem. Rev.* **1999**, *185-186*, 141-147.
136. H. Deng, P. Kebarle, *J. Am. Chem. Soc.* **1998**, *120*, 2925-2931.
137. S. Miertus, E. Scrocco, J. Tomasi, *Chem. Phys.* **1981**, *55*, 117-129.
138. a) A. K. Rappé, C. J. Casewit, K. S. Colwell, W. A. Goddard III, W. M. Skiff, *J. Am. Chem. Soc.* **1992**, *114*, 10024-10035; b) A. K. Rappé, W. A. Goddard III, *J. Phys. Chem.* **1991**, *95*, 3358-3363.
139. J. B. Foresman, T. A. Keith, K. B. Wiberg, J. Snoonian, M. J. Frisch, *J. Phys. Chem.* **1996**, *100*, 16098-16104.
140. P. Bultinck, C. Van Alsenoy, A. Goeminne, D. Van de Vondel, *J. Phys. Chem. A* **2000**, *104*, 11801-11809.



141. M. S. Ram, C. G. Riordan, R. Ostrander, A. L. Rheingold, *Inorg. Chem.* **1995**, *34*, 5884-5892.
142. L. Prasad, S. C. Nyburg, A. McAuley, *Acta Cryst. C. (Cr. Str. Comm.)* **1987**, *43*, 1038-1042.
143. E. K. Barefield, G. M. Freeman, D. G. Van Derveer, *Inorg. Chem.* **1986**, *25*, 552-558.
144. R. A. Palmer, B. S. Potter, S. Tanriverdi, J. L. Lisgarten, C. D. Flint, D. M. Gazi, *Acta Cryst. C. (Cr. Str. Comm.)* **1996**, *52*, 1177-1180.
145. C. Laurence, M. Berthelot, *Perspectives in Drug Discovery and Design* **2000**, *18*, 39-60.
146. M. S. Gordon, J. H. Jensen, *Accts. Chem. Res.* **1996**, *29*, 536-543.
147. P. Kollman, J. McKelvey, A. Johansson, S. Rothenberg, *J. Am. Chem. Soc.* **1975**, *97*, 955-965.
148. P. A. Kollman, L. C. Allen, *J. Am. Chem. Soc.* **1971**, *93*, 4991-5000.
149. a) J. S. Murray, P. Politzer, *J. Org. Chem.* **1991**, *56*, 3734-3737; b) J. S. Murray, P. Politzer, *J. Org. Chem.* **1991**, *56*, 6715-6717.
150. H. Hagelin, J. S. Murray, T. Brinck, M. Berthelot, P. Politzer, *Can. J. Chem.* **1995**, *73*, 483-488.
151. P. W. Kenny, *J. Chem. Soc., Perkin Trans. 2* **1994**, 199-202.
152. J. Y. Le Questel, M. Berthelot, C. Laurence, *J. Chem. Soc., Perkin Trans. 2* **1997**, 2711-2717.
153. J. Graton, C. Laurence, M. Berthelot, J. Y. Le Questel, F. Besseau, E. W. Raczynska, *J. Chem. Soc., Perkin Trans. 2* **1999**, 997-1001.
154. M. Berthelot, C. Laurence, M. Safar, F. Besseau, *J. Chem. Soc., Perkin Trans. 2* **1998**, 283-290.
155. *VAMP 7.5, Build 18*, T. Clark, A. Alex, B. Beck, J. Chandrasekhar, P. Gedeck, A. Horn, M. Hutter, B. Martin, G. Rauhut, W. Sauer, T. Schindler, and T. Steinke, Erlangen 2001.
156. a) M. J. S. Dewar, E. G. Zoebisch, E. F. Healy, J. J. P. Stewart, *J. Am. Chem. Soc.* **1985**, *107*, 3902-3909; b) A. J. Holder, AM1, In: P. v. R. Schleyer, N. L. Allinger, T. Clark, J. Gasteiger, P. A. Kollman, H. F. Schaefer III, P. R. Schreiner (Ed.) *Encyclopedia of Computational Chemistry*, 1st edn., vol. 1, Wiley, Chichester, S8-11.
157. C. A. Coulson, H. C. Longuet-Higgins, *Proc. Roy. Soc. (London)* **1947**, *A191*, 39-60.
158. P. G. Perkins, J. J. P. Stewart, *J. Chem. Soc., Faraday Trans. 2* **1982**, *78*, 285-296.
159. G. Rauhut, T. Clark, *J. Comput. Chem.* **1993**, *14*, 503-509.

- 
160. B. Beck, G. Rauhut, T. Clark, *J. Comput. Chem.* **1994**, *15*, 1064-1073.
  161. A. Bondi, *J. Phys. Chem.* **1964**, *68*, 441-451.
  162. *TSAR 3.2*, Oxford Molecular, The Medaware Centre, Oxford Science Park, Sandford-on-Thames, Oxford OX4 4GA, United Kingdom, **1998**.
  163. F. Cruège, G. Girault, S. Coustal, J. Lascombe, P. Rumpf, *Bull. Soc. Chim. Fr.* **1970**, *11*, 3889-3894.
  164. B. Beck, T. Clark, R. C. Glen, *J. Mol. Model.* **1995**, *1*, 178-187.
  165. B. Martin, P. Gedeck, T. Clark, *Int. J. Quant. Chem.* **2000**, *77*, 473-497.
  166. H. J. Böhm, *J. Comput.-Aided Mol. Des.* **1994**, *8*, 243-256.

## Publikationsliste

### Veröffentlichungen

- T. Clark, A. Elvers, F. W. Heinemann, M. Hennemann, M. Zeller, U. Zenneck, P6-Manganocen und P3-Cymantren: Konsequenzen des Einbaus von Phosphoratomen in Mn-koordinierte Cyclopentadienyl-Liganden, *Angew. Chem.* **2000**, *112*, 2174-2178; *Angew. Chem. Int. Ed.* **2000**, *39*, 2087-2091.
- M. Hennemann, T. Clark, A QSPR-Approach to the Estimation of the  $pK_{HB}$  of Six-Membered Nitrogen-Heterocycles using Quantum Mechanically Derived Descriptors, *J. Mol. Model.* **2002**, *8*, 95-101.
- P. Binger, T. Clark, F. W. Heinemann, M. Hennemann, H. Pritzkow, C. Topf, U. Zenneck, Intramolecular Reaktivität von  $\pi$ -Koordinierten P-Heterocyclen: How to form Five-Membered Rings out of Phosphaalkynen? *Phosphorus, Sulfur, Silicon, Relat. Elem.* **2002**, *177*, 1523-1527.
- T. Clark, M. Hennemann, R. van Eldik, D. Meyerstein, Solvation Largely Accounts for the Effect of N-Alkylation on the Properties of Nickel(II/I) and Chromium(III/II) Cyclam Complexes, *Inorg. Chem.* **2002**, *41*, 2927-2935.
- C. Topf, T. Clark, F. W. Heinemann, M. Hennemann, S. Kummer, H. Pritzkow, U. Zenneck, Ambiphilie, ein charakteristisches Reaktivitätsprinzip  $\pi$ -gebundener Phosphorheterocyclen, *Angew. Chem.* **2002**, *114*, 4421-4426; *Angew. Chem. Int. Ed.* **2002**, *41*, 4047-4052.

## Vorträge

- M. Hennemann, J. Schamberger, B. Martin, P. v. R. Schleyer, T. Clark,  $\sigma^*$ -Aromaticity of 7-membered unsaturated Phosphorus Heterocycles, V<sup>th</sup> Regional Seminar of PhD-Students on Organometallic and Organophosphorous Chemistry, Seč, Czech Republic, **1999**.
- M. Hennemann, T. Schindler, T. Clark, HOB0: an Alignment Free 3D-QSAR Method, MGMS Young Modellers' Forum, London **1999**.
- M. Hennemann, C. Topf, K. Eggers, U. Zenneck, T. Clark, Dichtefunktionaltheoretische Untersuchungen an Metallkomplexen mit Phosphor- $\pi$ -Liganden, Workshop des Graduiertenkollegs „Phosphorchemie als Bindeglied verschiedener chemischer Disziplinen“ Kaiserslautern, Veilbronn bei Heiligenstadt **2000**.

## Poster

- H. Lanig, M. Hennemann, T. Clark, Local Dipole Interactions for Molecular Alignment, Model(l)ing 97, 16<sup>th</sup> International Meeting of the Molecular Graphics and Modelling Society in cooperation with WATOC, Erlangen **1997**.
- H. Lanig, M. Hennemann, T. Clark, Local Dipole Interactions for Molecular Alignment, 12. Darmstädter Molecular-Modelling Workshop, Darmstadt **1998**.
- A.-M. Kelterer, M. Sacher, M. Hennemann, D. Niethammer und G. Grampp, Comparison of *ab initio* and experimental isotropic hyperfine coupling constants of various semiquinone radical cations, International Conference on Quantum Chemical Calculations of NMR and EPR Parameters, Schloss Smolenice, Slowakai, **1998**.
- M. Hennemann, H. Lanig, T. Clark, 3D-QSAR of ETA-Antagonists based on Full Conformational Searches and Quantum-Mechanically Derived Descriptors, 217<sup>th</sup> American Chemical Society National Meeting, Anaheim **1999**.

- M. Hennemann, T. Clark, Quantum Mechanical Estimation of  $pK_{HB}$ , 217<sup>th</sup> American Chemical Society National Meeting, Anaheim **1999**.
- T. Clark, A. Elvers, F. W. Heinemann, M. Hennemann, M. Zeller, U. Zenneck, Synthesis and Properties of the first Oligophospha-Manganocene - A Manganocene with a not degenerated Ground State of "a1g"-Symmetry, 3<sup>rd</sup> International Symposium of the Volkswagen-Stiftung „*Intra and Intermolecular Electron Transfer*“, Konstanz **1999**.
- M. Hennemann, M. Zeller, U. Zenneck, T. Clark, DFT-Studies of Hexaphosphamanganocene - a potential new Acceptor Molecule, 3<sup>rd</sup> International Symposium of the Volkswagen-Stiftung „*Intra and Intermolecular Electron Transfer*“, Konstanz **1999**.
- M. Hennemann, T. Clark, HOB0: an Alignment Free 3D-QSAR Method, 14. Darmstädter Molecular-Modelling Workshop, Darmstadt **2000**.
- P. Binger, T. Clark, K. Eggers, M. Hennemann, G. Marconi, H. Meth, U. Zenneck, Electrochemistry, EPR-Spectroscopy and Density Functional Theory: a combi tool applied to oligophosphabenzene derivatives, VW-Schwerpunktstagung "*Intra and Intermolecular Electron Transfer*", Wildbad Kreuth **2000**.
- M. Hennemann, T. Clark, Quantum Mechanical Estimation of  $pK_{HB}$  of Six-Membered Aromatic N-Heterocycles, Model(l)ing 2001, The Annual International Meeting of the Molecular Graphics and Modelling Society, Erlangen **2001**.
- C. Topf, T. Clark, F. W. Heinemann, M. Hennemann, H. Pritzkow, U. Zenneck, Pendulum and Harpoon as Molecular Tools in Organometallic Chemistry, SFB-Symposium on Redoxactive Metal Complexes – Control of Reactivity *via* Molecular Architecture, Erlangen **2003**.
